# Supplementary material for: Genome-Wide Identification, Classification and Expression Analysis of the MYB Transcription Factor Family in Petunia
Source: MDPI journal article supplement (doi:10.3390/ijms22094838), 2021-05-03
Supplement: s1 [file s1]

**Supplementary Table S1. The sequences of all identified PaMYB genes.**

Part I. The nucleotide sequences of PaMYB gene family.

Part II. The protein sequences of PaMYB gene family.

Part I. The nucleotide sequences of PaMYB gene family.

>Peaxi162Scf00001g00231.1

ATGGGAAGAGCACCTTGTTGCGAGAAAGTGGGTCTCAAGAGAGGTAGATGGACT  
GCAGAGGAAGATGAAACCCTCACCAACTATATTTTGACTAACGGCGAAGGTTCTT  
GGAGGTCATTACCCAAAAATGCTGGCTTACTCAGATGTGGGAAAAGTTGCCGACT  
GAGATGGATTAATTACTTGAGATCTGATTTGAAGAGAGGTAACATAACTTCTGAAG  
AGGAAAACATAATCATCAAGTTGCATGCAACTTTGGGTAACAGATGGTCTCTAATA  
GCCGGACATTTGCCAGGTAGAACAGACAATGAGATTAAAACTACTGGA ACTCTC  
ATCTAAGTAGGAAAGTTGAAAGCTTAAGGATTCCAAGTGATGAAAAGCTGCCTCA  
AGCTGTAGTAGATTTGGCTAGAAAGGGAGCATTAAAGCAAATCAAACGTAAAGTT  
GGCCGAACAAGCCGATCTACCATGATGAGAAACAGGAAGTCAAAAAATTCCGCTG  
TTTCAAGTTTGTCAATGCCAAAGCAACTTAAAGAAAGTAGTGAACCTTTAAATGCA  
ACAGTCCCTATCATGCCGTCAACCCCAA ACTTGGAGAAAGAGGCCTTATCTAGGAC  
TAGCACCATTAGCTCATGGCTAGATGGTAATAATGCCATGGATTCCATGCAAAAAGA  
GGTAGCAAACATAGCGGCGCCAAATCCTTTGATGGAGTCTAGAGAGGCTCATAGC  
AGCCTTAGTTCAGATGGGATGGAGTGGCTTGAAGAGATTATGCCACTGGTCATTGA  
TGATCAAGATATGGACCCAAATTT CATATTTACTTGTTTAGAGAATGGGCAGGGAG  
AAAGCGCAGTAAAAGTCACCGAGGAGGCAGATAATAACTTCTTGAACACAAGTAA  
AATTAATGAACGTGACAACAATAACAGAGAATCAAGTGAGGCAGCTGTATCAATA  
AATATTCATGATGAACAAGTACACGAGAAAAGCAACGAAACGAGTTCTTTAATGA  
AGGATGAAGGTACATTTGATCAATGGGATTGGAAAGAGATAACTCATGATGGAGGA  
AAAGGCTGGCCATGGGATGACAACAATTCGCTGCAGCTATGGGATACGACTACTG  
ATGACACCGGGTTTTTTTCAAAACTGTATAAATGAAGCAACGGTGGAAATGGATTCC  
GTGCACTTTGAAAACCAAAGCATAGTGCTCTTGTCGCTTGGCTTTTGTCTTAG

>Peaxi162Scf00001g00599.1

ATGGAAGGAAGAAGACCATCATCTTCATATCATCATTATCGTTATCATTTTCATCATG  
AAGATGAACTTGGAGAAATAAAGAAAGGACCATGGAAAGCAGAAGAAGGTGAAG  
TGTTATTAAATCATGTGAAGAAATATGGTCCAAGAGATTGGAGCTCCATTCGATCCA  
AAGGTTTACTGCAACGTACTGGAAAATCTTGTCGTCTTTATTGGGTTAATAAACTTC  
GACCCAACTTGAAGAATGGAGTGAAGTTCTCAGCAGAGGAGGAAAGGACAGTGA

TTGAACTTCAGGCACAATTTGGGAACAAATGGGCAAGAATTGCTACACATTTGCAT  
GGAAGGACTGACAATGATGCACCTAAATTCAGTTCATCAGCAGATCAAGAAGAGT  
TTTTATCCAAGTCTCAATCTTGTTTCATCATCCTATATTGATAACTCTAACATGATCTAC  
CTGGTTCCATTGAATCCAAATTCAACTGATTTTGAAGCAAACCTTGCTTCAACTTGAT  
TTCCTGCTAATGAGAAAAAACTCAAAATAGATTCACATATTCAGCTCCCTTTTACT  
AAGCTTCAAAATGACTTTGCTCTGCCGTTACAACTCATGAATCCCTATGCCCAA  
CTTTATAGATGTTTTTCGGTCAGCAGCTCAATGGTTCTGAATTAGATAATGTGCAAGT  
CCCATTTGTATCGACGTGCTCGGGACCAGATAGATCATGTTTTTGAGAATCCTTCAAG  
TCCAGATAGCTTCATTGATGATTTTCCTTTGGATATGTTTGATCACATTGAACCTCTG  
CCTAGCCAATCCGAA

>Peaxi162Scf00002g00037.1

ATGGGAAGACAACCTTGTTGTGACAACTTGGAGTGAAGAAAGGTCCATGGACA  
GCTGAAGAAGACAAGAACTCATAAGTTTTATTCTTACAAATGGCCAATGTTGTTG  
GCGTGCTGTTCTAACTTGCTGGTCTTAGACGTTGTGGTAAGAGTTGTCTGACTGA  
GATGGACTAATTATCTTCGACCTGATTTGAAAAGAGGCCTTCTTAGTGATGCTGAG  
GAGAACTGGTTATTGATCTCCATTCTCGTCTTGGAACAGGTGGTCCAAGATTGC  
TGCAAGATTACCAGGAAGGACGGATAATGAGATTAAAAATCATTGGAACACACATA  
TTAAGAAAAAGCTTCTCAAAATGGGGATTGATCCTGTTACACATGAACCACTCAAG  
AAAGAAGCAAATCTAAGTGACCAGCCTAATACAGAATCTGATCAAAATAAAGAAA  
ATGGTCATCAGCAGGTACAAGTTGTACCACAGAGTACAAATGTCACAGCGGCAGC  
AGCCACCTCCACAGAATTTGATAATAACTCTTCCTTCTCTTCTTCAGCTTCTTCGTC  
CGAAAACCTCTTCATGCACCACTAATGAATCCAAGCTTATCTTTGATAACCTTAGTGA  
AAATGATCCACTACTAAGCTGCCTACTGGAAGCTGATACTCCTCTTATCGATTGCGC  
ATGGGAATTTCCAATGTCTTCTACTACTGCTGAAGAACCACAAAAGTTTCGATA  
GCATTATTAGTAACATGACATCCTGGGAAGACACTTTCAATTGGCTTTCGGGTTGTG  
AAGAATTTGGTATCAATGACTTTGGTTTTGATAATTGCTTCAACCATGTCTGAATTGG  
ACATCTTCAAAACCATAGATAACGTAGAGAACAGGCACGGATAA

>Peaxi162Scf00004g02328.1

ATGAGAAAGCCTGAGTTCTCCTCCTCCGGCAAGAATGGAACCAACAGTAACAACA  
ACATCAATAACGCGAACATGAAGTTAAGAAAAGGCTTGTGGTCGCCGGAGGAAGA

TGAGAAGCTCATGCATTATATGTTGACAAATGGACAAGGTTGTTGGAGTGATGTGG  
CAAGAAATGCTGGGTTACAAAGGTGTGGGAAGAGTTGTAGACTAAGGTGGATTAA  
TTATTTAAGGCCTGACCTTAAAAGAGGTGCATTTTCACCTCAAGAAGAAGAGCTTA  
TTATCCATTTACATTCCCTTCTTGGTAACAGGTGGTCTCAAATAGCTGCACGTATGC  
CTGGACGTACTGATAATGAAATCAAGAATTTTTGGAATTCAACATTGAAAAAGAGG  
CTAAAGAACTCATCATCTTGCTCTACACCATCACCAAATGCAAGTGACTCATCCTC  
AGAACCCTGCAAAGATAATCTCAACATGGGAATCAATCAAGGATTGATCATGTCAA  
TGCAAAATCATAACCTAATGTCCATGTTTCATGGACTCAACCTCGTCTTCTTCCTCGT  
CTATGGCCCTAAATACCATTATTGAACCTTTGCCCATGCTCGAGCAAACCCTAATAA  
ACATGCCTAATGGATTGAGTGCACCTCCATACTTGACTACACAACCATGCATGACA  
CAAGGAAGGAGTATTGTGACCAATGGAAGTCTTTTTTATGGGAATAATCATGGCAT  
ATTTGGAGGAAATCTTGGTATGGAAGGAGAGCTCTATATTCCACCTTTGGAGAGTG  
TAAGCATTTCATGAATATCAAATGTTGAAAATGGGAATCTAGTTGAAAGGAGCAGT  
CAGAACAATAATAACCCTACTAACAGTATGACCAACTTGACTAGCCATTTCAATAGT  
AGTAGTAATAATATCAAAGTAGAAAATTTTGGAGGGGTGGGGAATTATTGGGAAGG  
AGATGAGCTAAAAGTTGGAGAATGGGACTTGGAAGAATTGATGAAGGATGTTTCA  
CCTTTCCCTTTTCTTGATTCCAAGTTGAATAA

>Peaxi162Scf00006g00098.1

ATGGCAAGGACACGTTGCTATGACAAAAGTGGCTTGAAGAAAGGTACTTGGACTC  
CTGAAGAAGATAGGAAATTAGCTGCTTATGTTACTAGATATGGTTGCTGGAAGTGG  
CGTCAACTTCCCAAATTTGCTGGATTAGCAAGGTGCGGGAAGAGCTGCAGACTGA  
GATGGCTGAACTATCTCCAGCCTAATATCAAAGAGGAAATTACACCAAAGAAGA  
AGACCAGATCATTATGATGCTTCATGCAGAAATTGGGAATAAATGGTCAGCCATTG  
CTGCTCACTTACCTGGAAGATCAGACAGTGAAATTAAGAATCACTGGCACACTTCC  
CTCAAAAAGCGATCAACTCAAGAAGAATCAACTTCAAGTACTAACTCAAAGAAGA  
GATCACCTATTAACAGTAAATACATCTCCAGCAGTCGAAAAAAGAGAAGTGGAAG  
TGGAATCAAATAAGTGTGAAGTCTAATGTTCTCAATTGTCACCAAAGCAATCAT  
GTAGTGAGGTTTCCTCTTGCTTCAATACATGTGGAAAGTATGCATGTAGAATCAG  
AGGGTTATCAAGAAGAATATTTATTTGAGGAATCAAGTGGAATAAGCTTTTGGACT  
GAACCATTTTTAGTAGATAATTCTAGTACCACAAATGATTTTTTTGTGCCTTCAGAA

CTTGACCATGGGCTTGTATCTCCATTTTCTCCTGTTATCAGTTTTGATGAATTTATAT  
GCTCCTATGATTAA

>Peaxi162Scf00007g00207.1

ATGGTGAGAACACCTTGCTGCGACGAAAATGGACGGAAGAAGGGGACATGGACT  
CCTGAAGAAGACAGGAAGTTAGCAGCATATGTTACTAAATATGGTTGCTGGAAGT  
GCGCCAACTTCCCAAGTATGCTGGTGAGAATTTCTGCACAATTTACACCAATATTG  
CTCCTCGTGAAGGTCTAGCAAGATGTGGAAAGAGCTGCAGACTTCGATGGATGAA  
TTACCTAAGACCCAATGTTAAAAGAGGTAACCTACACCAAAGAAGAAGACGAGATC  
ATCTTGAAGTTGCATGCTGAACTTGGAATAGGTGGTCAGCTATTGCTGCTCAGTT  
GCCAGGAAGATCAGACAATGAGATAAAGAATCATTGGCACACCTCCCTTAAGAAG  
CGTGCTAACTATGGGCCAAACTCAAGTGAATCAAGCAAGAAATGCAATAAGAATA  
GTGAAAGTAAGAGAAAGAGAGTGGAAAATCAAAATGCAAGTCATGAAACAATAC  
TGGAAGTTCCCATATGTCACCAAAGCAGTCAATAGGTGAAGAACTCTGCTCTAAC  
ACCACAGATTATAAACAACAGGATGTCGCGAGCGTCATTAGAGAAGAGGAATTATA  
TTACGAAGAAGCTTTGGCAGAAATTAGTGGAACTTTTGGACAGAACCATTCTAC  
TGGATAGTTTCAGCAATAGATTTGATTTTCGAGCTCCTTCAATTGATTGTGGACTTG  
TGTGTCCACCTTCTCCTTTTATAGGCCATGAACTTCTTTCTTCGTTTGACTTTGATGA  
TTCTAATTGGTGA

>Peaxi162Scf00007g00823.1

ATGGCCCCAGATGATAGAGGAATGAAGAATGGTGGGGCATCAACAGGAAGATCAA  
ATGGAGCTGGATCAAGTAGACAAGTATTAAAGAAAGGGCCATGGACAGCAGCAGA  
AGACTCGATTTTAATGGAGTACGTGAAAAAACATGGAGAAGGGAATTGGAATGCT  
GTTCAAAGGAATTCTGGATTAATGAGATGTGGAAAAAGTTGTAGATTAAGATGGGC  
TAATCATTTGAGACCAAATCTTAAGAAAGGTGCTTTTACTGTTGAAGAAGAGAGA  
ATTATTATTGAACTTCATGCTAAACTTGGTAACAAATGGGCTCGCATGGCTGCTCAG  
TTGCCTGGAAGAACAGACAATGAAATCAAAAATTACTGGAACACAAGGCTAAAGC  
GAAGACAAAGAGCTGGTTTGCCCATATACCCTCAAGAATTACAACAACAAAATCA  
ACATGAAAATAATAATCAACCCACAGTCTTCTTTCTTCATCATATGATCCTCAAAA  
TTCGACTAATTACAATTCTCCTTCTCTTTCCCTTTTGGATATCTTCAATCCTTCCACC  
ATGAAACCTTCAATTACACAACAATCCCTATTAATACTCCTTCTCTATGTCTGCCA

AGTACCAATAATAACAATATTTTTCGCAACACTCCCAAAGGTCTTTCCTTAACATTG  
CCATCATCTATGAGAAATTCACAGTTTTCTTCATTGCCTAATAACAATTTTACCCAA  
GGCCTATCATCCAATTCAATACAAGTTCGCGCGTTTCAACATAACTATCCAAATTTT  
AACATAAATAGGCCATTTACGGGGATTTCTTCGAATCCAAATGGATTAATCTGCGGT  
ATGGGCATTAATACTATTAATTATCCATCAGGGCAATCATCCATGCCTGTAACAGCAT  
CATCTTCTGAGAATACAGGCAGCGATTTTGGTTCAAGTGATAATGCTAATAATTATG  
CAAATACTAATGGATTATCGCGGGGAAATAGTGGATTATTAGAAGATTTATTGGAGG  
AGTCACAACTTTGAACCGGCCTGGTATGAAAATAGAAGACAATTTTCTTGATTTA  
AAAGAGGATCAAGAAGCTGATTATAAAGGAAAATCAATGTTGTGGGAAGATTATG  
GATTAGTGGAAGATGCTGAAGAAGCAATTTTAACTGAAGAATCAGCTTATAGCTTT  
GCTCATGGTGTGATCATGTGCGACAAAATAAAAAATTCTGAAAGCTCTAGCCCTCA  
TAGCCCTCCTAATTCATCTTCAGGGATATTCATGAAAAAGGAAGATTCATTTTCATGG  
AACTAATCAAGCAGACGACGATATAATGTGCCTTCTTGATAATTTTCCATTAGCTGT  
ACCAGTTCCTGAATGGTATGAAGATGAGGATGACAAAAATAATTGTAATGGGCAAT  
CGTCAAACGTGACCAATTGTGATCACATTGCTGAAAATCAGGCTGAAGATTCCAA  
GTCACCAGCTTTGACATTAAATTCAGGGACTAGGAACCATGATTGGGAATTTGGAG  
GATGTTGCTGGAATAATATGCCTTCATTTTGCTAG

>Peaxi162Scf00007g02122.1

ATGGTGAGAACACCTTGCCGCGACGAATATGGAAGGAAGAAGGGGACTTGGA CTC  
CCGAAGAAGACAGGAAATTAGCAGCATATGTTACTAAAAATGGCTGTTTGA ACTG  
GCGCCAACTTCCCAAGCATGCTGGTCTAGCAAGGTGTGGAAAGAGTTGCAG ACTT  
CGATGGATGAATTACCTAAGACCCAATGTTAAAAGAGGGAACTACACCAATGA AG  
AAGACGGCATCATCTTGAAGCTGCATACTCAACTTGGAATAGGTGGTCGGCCATT  
GCTGCTCACTTACCTGGAAGATCAGACAATGATATAAAGAACCATTGGCACACTTC  
CCTTAAGAAGCGGGCTAATTATGAATCAAGCAAGAAATACAATAAAAATAGGGAA  
AGTACTAATACGAAGAATCAGGCCAGCAGTAGAAGAAAGAGTACTGTAGAAAACG  
AAAATGCAAGCTCTCTAAGCTGTAGTATGAGTACTCATGAACTATACTAGAAGGT  
TCACAATGGTCACTTAAGCAGTCATCAAGTGAAGAAATCTCCTCTTGCACCGCAGA  
TTATCAACAACTGGATATTGCGAGTGACATTAGAGAAGTTAAAGTTTTTGAAGAAG  
AAGCTTATGTGGCAGAAAGTTGTGGAAGCTTTTGGACAGAGCCATTTGTAGTAGAT

AGTTTCAGCAGTAGACTTCATGATTGTGTAGCGCCTTCAATTGATTTTGAACCTGTG  
TCTCCCCCTCTCCTTTCATAGGTCATGGATTATTTCTCGTTTAACTTAGATGATT  
ACCTCATGCTATCATCGCTGTTTGACTIONAG

>Peaxi162Scf00007g02125.1

ATGGTAAGAACACCTTCAATTGATAAAAATGGAATGAAGAGAGGTGCATGGAGTG  
AAGAAGAAGACAACAACTTAGAGCTTATGTTGAAAGATTGGCCATCCCAATTG  
GCGAAAATTGCCTAGATATGCTGGTCTAATGAGATGTGGGAAGAGCTGCAGATTGA  
GATGGATGAATAACTTGAGGCCAGGTTTGAAGAAAGGGAATTATAGTCATGAAGA  
AGAGCAACTCATTATTAATTACACAACCAACTTGGAACAGGTGGTCAACCATAG  
CAGCAAAATTACCAGGAAGATCAGACAACGATATCAAAAACCACTGGCATGCTCA  
TCTCAAGAAACGTACAAAGACAAACGCCAATTCATCAACAATGGAACAAATGAGT  
ACTGAGTCTTCACAATCTGGATGTCAAGCTGAGCAATCTAACTCTAACTTCCAGA  
ACTTGAGAACTACTGTGATCCTATTGACACTTCATCTCCTCCAGAGGTTTCATCAAG  
TGATTTATCAAAGTTATTTTCCAGTTGTTCCCTCTTAAATGGAATGGATTGGATTGA  
AGATGATCAGATCAGGTCAATGGAACAACCTATCAAATATTGATTCAGTGGAACCAC  
TTCTAGACTCCTTTAGTTGCTGGACAAAGCCATTGACAACCTTTCAGACAGAACAT  
TGCTTTGACAATGTTTGGTCCGAACACTTTGATAATTTCTGGACACAACCTTTCCTT  
TAA

>Peaxi162Scf00007g02128.1

ATGGTAAGAACTCCTTCTGTAGACAAAAATGGAGTGAAGAGAGGTGCATGGACTG  
AAGAAGAAGACAACAACTTAGAGCTTATGTTGAAAGATTGGCCATTGGAATTG  
GCGACAATTGCCTAAATATGCTGGACTAATGAGGTGCGGGAAGAGCTGCAGACTG  
AGATGGATGAATTATTTGAGGCCTGGTTTGAAGAAAGGAAATTATAGTAATGAAGA  
AGGGCAACTCATTATTAATTACATAACGAACTTGGAACAGATGGTCAGCAATTG  
CAGAAAAATTACCAGGAAGATCTGACAATGATATCAAAAATCAGTGGCATTCTCAT  
CTTAAGAAACGTGCCAAAACAAATTCCTATTCATCAACATTAATGGAACAAATGAG  
TACTGAATCTTCTCAATCAGGATCCCAAAGTGAGCAATCTTGTAACCTTTCAGAAC  
TTGAGGCTTGTGATAAGAAAGAAGTGACTTCTGCTGCTATAGATCGTCTAGATTCA  
GTACCACCAGTGTCATTAGAGGTTTCATCAAGTTCCTTTTAAATGGAATAATGGAC  
TACTGGATGGAAGAAGAAGATCGCATGTTTCAGGCCGTCAATGGAACCTACTTTCAT

AATGGTGAGAACTCCTTCCATTGACAAAAGTGGAATGAAGAGAGGTTTCATGGAGT  
GAAGAAGAAGACGACAACTTAGATCTTATGTAGAAAGATATGGCCATCCCAATTG  
GCGACAATTGCCTAGATATGCTGGACTAATGAGATGCGGGAAGAGCTGCAGATTGA  
GATGGATGAATTACTTGAGGCCAGGTTTGAAGAAAGGAAAGTATAGCCATGAAGA  
AGAGCAACTCATCATTAAAGTTACACAACCAACTTGGAACAGATGGTCAACAATT  
GCAGAAAACTACCAGGAAGATCAGACAATGATATCAAAAACCACTGGCATGCTC  
ATCTCAAGAAACGCTCCAAATCAAATACTAACTCATCAGCAATAATGATGAAGCAA  
CTTATTGAATGTTCTCAATCTGAATCTCAAGACGACGAACATTCTAATTCTAAATTT  
GCGGAACATGACAGCTTTTCTCCTATAGATTCAGTACAACCAGTGTCCTCAGATGT  
TTCATCGAGTTCCGTTTTAAATGGGATGGACTGCTGGTTCGAAGAAGATAATCACA  
TATTCAGTTCATGGAACCATTGCCAGACTTCTTTAACTTTAGCTGGACAAAACCC  
ATCTACAATTTTCAGACAGAACCCTTTGATCATTATTGGACAGAAGCCATGGATAAT  
TTTTGGACAGAACCATTCTTTTAA

>Peaxi162Scf00007g02414.1

ATGGGAAGATCACCATGTTGTGATAAAAATGGACTCAAGAAAGGTCCATGGACAC  
CTGAAGAAGATCTTAACTTATCCAATATATTCAAGTTCATGGTCCTGGAACTGGC  
GAACTCTCCCTAAGAATGCTGGACTTCAAAGGTGTGGAAAGAGTTGTCGTCTTCG  
TTGGACTAATTATTTGAGACCTGATATTAAGAGAGGAAGATTCTCTTTTGACGAAG  
AAGAAACAATTATCCAACCTTCATAGTGTTCTTGGCAACAAGTGGTCAGCTATAGCA  
GCTCGTTTGCCAGGAAGAACGGACAATGAAATCAAGAATTATTGGAACACTCATAT  
TAGAAAAAGGCTTCTAAGAAATGGTATTGATCCAGTGACACATAGTCCCCGTCTTG  
ATTTATTAGACTTATCATCTCTTCTAAATTCCACTCAGTTTAACTTATCGAGCTTACT  
TGGACTACAAGCACTTGTAACCCCTGAAGTCTTTAGACTTGCAACTACTCTTTTGG  
CATCACACAATAATGAAAATCCAGAGTTGTTACTTCAAAAACCTTCAAGAAAACCA  
ATTGTTGAACACTCAACTTCAACAAAATCAATTATTGAATACACAATTGGGAAATC  
ACCTTCAAGTTTTTTCAACCTAATAGTCAATTCCAAAATCAAATTCAAGAAATACCA  
ACTTTCACCCCATCAAATGTTCTTGTTCATCTTCACAGCCCATGCAGCTAGGACCC  
GTGGAATTATCCTATTTGATGAATGGCCAAATGCTACCTCCACAATATGGTTATTGTG  
CTTCTAATGTATCCGACAGTTCCAATTTGCAATCACTAAACAACAGCAACAATCAG  
AATAGCAGTAATTTGAGCTTGGATTGCGGTGTTGTCAACGCCTTTGTCTAGCACAGA



AGATGAGAAAGAAAGCTATTGCAGTAATTTAATGAAATTCGAAATCCCAGCCAGTT  
TAAATTTTGATGATTTTATGTAA

>Peaxi162Scf00008g02024.1

ATGGGAAGAGCACCATGTTGTGATAAGAAAGGTTTAAAGAAAGGACCATGGGCAC  
CTGAAGAAGATGAGAACTTATTGAATATATCAAGAATAATGGTCATAATGGTTGGC  
GTTCACTTCCAAAGTTAGCAGGTCTCCTTCGATGTGGTAAAAGTTGCCGTCTTCGA  
TGGACGAATTATCTGAGGCCAGACATCAAACGAGGTCCGTTTAGCGAGGAGGAAG  
AAAAGCTTATTATACAGTTACATGGCATTCTTGGCAACAGATGGGCTGCAATAGCA  
GCACAACCTCCTGGAAGGACGGACAATGAGATCAAGAACTTGTGGAATACTCACC  
TGAAGAAGCGCCTATTTTCCATGGGCATTGATCCTCATATTTATGAACCATCATCTG  
CGCCTAGTGGGCTGGTTAGGAGACCACCTGCGTCATCTTCAACACGTCACATGGC  
ACAATGGGAAAGTGCTAGGCTCCAAGCTGAAGCTCGTCTTTCTAAGGACTCACAT  
TTATCGATTCCCTCTTTAGTAGGAAAGTCTCAGAGCGATTACATTTTGCGCATCTGG  
AATTCTGAGATAGGAGAAGCATTTAGAAATTTCAAAGGAGTAGAAAAGACTACTT  
CTGAATCTTCATCTCCAAAATGTGGATCAACTTCAAGCATCACAACCGAAATGGAC  
ATTACTCTTACTGGTTCCTCAGTTGAAGGAACTAACCAACATAAAGATGCAGAGTG  
GAAGAATTGTAACTATATACTGGAAATATCTTGCGTGGATCAGACACATCTAGCTC  
CAACGATTTTGAGGAATCTTCTGAATCAGCACTGCAACTTCTTTTGGATGTCCCTA  
GTAAATATGACTTGAGCTTTCTAGGACAAAGTGATGCATACAGCATGTACCCTGCC  
TTTTTAAGTGAAAGCTGCTTGAAGTCTCTTCTACAGAACATGAAGTTTGCTATGT  
TTAA

>Peaxi162Scf00009g00022.1

ATGGAGTTTGATCATAGTAGTAATCAAAACCTCTCTCTTCAGCCATATAACAACAGC  
TTGATACGTGGAGAAATGGATGATGTTTTTTGCACAGTCTCTAAAGATTATCTTCAA  
GATTTTCATCACCTTGATCTTACCTTCAACAACCCTCATGATAATTTATTGATCGAAA  
CGAATGGTTATGACTCGTTATTTGATCCAATCTTGAATGAGGGTAATCTCTCATCAC  
TGGATCATCAAGATTTCAACTTGAATTATGAGTTCAAGCCATTTGAGCAAAATAGT  
GCAAGTGGTAGTACACTAGTCATGAAGAATTTTGAGAATTCAATGGATATGCACAC  
GTCGAATGATGAGAACCTTTTGTCAATTGTGTTCTGAAGATATGAAGCCTCTCAGCTT  
TGTTAATGTGCAGGATGAAAGTTCATGCATTACTGCTGATAATAACTATTATGATAAT

AAAATTTGTCTGAAGAAAGAAGAATAAAAAAGTTAGCAGCAAGGAGAATATTTTAT  
CTCCTTGTATGGGAAAAGTAGGAAAAGGTAAAAAGAAGTCTAAATCAGCCAAAGG  
GCAATGGACTACTGAAGAAGACAGGCTTTTGATCCATTTGGTAGAGAAGTTTGGA  
GTTAGAAAATGGTCTCAAATTGCTCAAATGCTTAAAGGGAGGATAGGCAAGCAAT  
GTCGAGAGAGATGGTACAATCATCTTAGACCTGATATCAAAAAGGATTTGTGGACA  
GAGGATGAAGACAGGATATTAATCGAAGCTCATGCAGAAGTAGGAAACAAATGGA  
CGGAAATCGCAAAGAGACTGCCTGGAAGAACTGAAAATTCCATTAAGAACCATTG  
GAATGCAACAAAAAGAAGGCAATTCTCAAGACGAAAATGTCTGAACCAAATGGGC  
AAGGCCAAGCTGTCTCCTCCAAAATTATATCAAAAAGTTTGAACTTCGAAAAGAGTA  
TTAGGAGCAGCCATGACACAACATTAATGCACCTAAACAAGAGCCTTTTGGCAAT  
ATTCCTGATTATGATTAACTAGTGAAGTCCCCGAATTTGCTTTTGATGATAAATTGT  
TTGATGAGAATATAAACATGGACGCTTTAATGGATCAAATTCACGACAGATGCTTG  
GATTTGGAGATTCTTATGATGAACTGCCCAAGCTGATGCAAGGTGATGCCAATAA  
GGAGCCTGACTCGATAGATTTGATTCAGAGATA

>Peaxi162Scf00009g00621.1

AGTCAGAAGGTCAGGTGGAGTAATCGTCTGAAACCCGATCTTAAGGAGGACAAC  
TCACACCCCAGGAAGAGGAATTGATCATCAAGCTTCATGCCACTATAGGAAGCAG  
GTGGTCCATAATAGCACAACAACCTACCTGGTAAACAGACAATGATGTGAAGAAC  
TTGTGGAACACTAAGTTGAAAAAGAAGCTCTCAGCAATGGGAATTGATCCTGTTA  
CCCACAAGCCTTTCTCCCAAATACTCACCGACTATGGAAACATTGGTGGCTTCCCA  
AAAGCCAGAACTCATTTTGTGTCACTTAACAGAGAACTAAAGGGCGCATTTATGTC  
TAGACCAGAACAATTTCAACATCCTCTAGAAATATTTTCAAATTTCAACAGCCATTG  
TTTGACAACAATTAAGTTACCAAAAGCTGAAGCTTCAGAAGATTGTTTCTTAAGCA  
ACACCAATGATTCTAGCAACAACCAGCCTCCTGTTGATCTACTTACCGAACTACAA  
GCCATAAAATTTGTGACAGACGCCTCTAATTACAGTTCCCCCAAGGCAATTTTCTC  
CCGTTCCAATCCCATAAATGACTACTCATCGTCTCCACTGTCATCCTCATCATCA  
TCTGCATCTCATTATTGAGCAAACTCAAGTGGAAGAGCATCCCCTGGCTTGAA  
CTGGTGTGACTATCTTCTTGACGATGCCTTTATTCCATCAAATTTCCAAGTTCAAGA  
AGACACATTAACCATAGAAGACAAGCTAGCGTCTGGGGCGGCTCAAGATGGACAA  
AGCAACATGCCATCAATGAAGGATTCTGAAACCTCATTATCTACAAGGGGTGCATC

CTCATCATCATCATCATTTGTTGAAGACATGCTTGAATGCGAAAATGAGATGTTCTT  
GAACTTCCCTGGACTCTCTGAGGATCCGTTTTACTAG

>Peaxi162Scf00013g00223.1

ATGGGAAGGCCACCTTGTTGTGATAAAATTGGTGTCAAGAAAGGACCATGGACAC  
CAGAAGAAGATATCATTTTAGTTTCATATATTCAAGAACATGGTCCTGGAAATTGGA  
GAGCTGTTCCAATACTGGTTTGCTAAGATGCAGCAAAAGTTGTAGGCTTCGA  
TGGACTAATTATCTTCGGCCAGGGATCAAACGTGGAAATTTCTCTGAACATGAAGA  
GAAGATGATTATCCACCTCCAAGCTCTTCTTGGCAATAGATGGGCAGCTATAGCATC  
ATACCTTCCACAAAGAACAGACAATGATATCAAGAATTATTGGAATACTCATTAAA  
AAAGAAGCTTAACAAGAAGATGGAAGGCCATGATCATGAGAATATTAATGAAGTG  
GGAAAATCATCATCATCATCTCAATCAAATGTCCCAAAGGACAATGGGAAAGGA  
GGCTTCAAACAGATATTCACATGGCTAAACAAGCACTTTGTGAAGCTTTATCACTT  
GACACACCTTCAAATGTTGATTCTCCAAATAATAACAATAATCCAACCTCCAAAATT  
CTTCCTGTTGATCAACAACCAGTCCAAACATCTACCACCTATGCATCTAGTGCTGA  
AAATATTGCTAAGTTGCTTGAAAATTGGATGAAAAATTCACCAAAGTCATCCGAAA  
GTCGATCTAGTTCAAAAACACTCAGATGTCATCCTTGAACAATTTATCAATTGGTG  
CAGTTTCAAGCTCTAGTCCTAGTGAAGGTACAAGAAATGTTTTGGACTCAGTTTTT  
AGCTTCAATTCATCCAATAATTCGGATGTGTCACAATCCATGTCTATCGATGAAGGT  
GGTAATTCACACCTGAGAATAACAATGCTACAATTTTCCAAGTTGAAAGCAAGCC  
AATTAATTTGCCTAATTTCAAGGAAGACAATGGAATTTTCAACAGGTGAGCAAGC  
CAAATTTGGAGACACAACAAGTGCCATTAACCTTTGCTAGAAAAGTGGTTACTTGAT  
GATGCAAATGCACAAGCTGCACAAGAAGAGTTTATGGGAATTGGAATGGGAATGA  
CTTTGGGTGAAACTGCTGATTTGTTTTGA

>Peaxi162Scf00013g01023.1

ATGGGTAGAACTCCATGCTGTGAGAACTAGGGTTGAATAGAGGTCCATGGAGTA  
AGAAAGAAGATGATATACTCATAAATTACATTGATAAACACGGCCACCCTAACTGG  
CGTCAACTTCCCAAACCTTGCAGGTCTATTGAGGTGTGGAAAGAGTTGTCTCTCCG  
ATGGACTAATTACTTGAGGCCTGAAATTAAACGAGGAACTTTACTCCTGAAGAGG  
AAGACACCATTATCAAGTTGCATCAAGTTCTTGGCAACAGGTGGTCTGTAATAGCA  
GCAAAATTACCAGGACGAACAGACAACGAAATAAAAAACATTTGGCATACTCGTC

TGAAGAAGAAAATGAATCAGTCTCAGATTCAAGAGAAAACACCAGACATACGAG  
AACAACCAAGTGAAACATCAAAATCCGAGGATTCAACAAATATACAAGAAAATAC  
TGAAATATCAAGTCCTAAACCAAATTTCCAATAATCAACACGAACCAAGTTCATCGT  
TACGTTTCATCGTCTTCAATAACATCATCAAGTGAAGGTTTCATGTTCAAACACAACC  
ACAACGAGTTCACATATTGACGAGTCTCGAGACCAAATGAACTTGGAGAATTTGCT  
TGAAGTTGACGACAATTTTTGGTCAGAAGTACTATGGGCAACACCTGCAGATGATT  
CTAAGGACAATAATCTTGATTTTTTCATTATCTTCAGTGGAGAAAAATTACGAGCTTG  
ACTCCAGCTTGAATGATAACTGGTTATGGGATGATCTCTTTTCAAGAGCCAACGAG  
TTTTTGCTAGAAATCCCTGAATTAGTATGA

>Peaxi162Scf00015g01036.1

ATGACATCCTTGTCTAAAAGTTCAAGTAGCTCTAGTGATGATGATATTGGGTTGAGG  
AGAGGTCCATGGACTGTTGAAGAAGATACTCTCCTTGTCCATTACATTTCCCATCAT  
GGCGAAGGCCGATGGAATATTCTTGCTAAACGTGCTGGACTAAAGAGAACAGGGA  
AGAGCTGCAGGTTGAGATGGCTGAATTACTTGAAACCGGACGTTAAACGAGGAAA  
TCTCACTCCACAGGAACAACCTCCTGATTCTTGAACCTTCATTCCAAGATTGGGAACA  
GATGGTCAAAAATAGCGCAATATCTCCAGGAAGAACCGATAATGAAATCAAGAA  
CTACTGGAGAACAAGGGTGCAGAAACAAGCCAGGCATTTGAAGATCGACTCTTCC  
ATTCAGAATGTTCCAATTTGATTCCACCTGGAGATTCCGGCTTAAATACATTTATC  
AAGGCTCATTTCCCATTTGGACGGCGAAAGTTATGATATGGATACATTTCAGTCCAGC  
AACTTGCAGTTTTAAAGATGTGCTATATTATGATCAGATGAGTGGAGAAAACAATG  
CGCCTGGTGATGTTTTAGCTGACAGCTTTTGGAGCATGGACGAATTTTAA

>Peaxi162Scf00015g03118.1

ATGGTAAGGGCTCCTTGTGTGAGAAGATGGGGTTGAAAAGGGGTCCATGGACTT  
CAGAAGAAGATCAAATTTTGATATCTTTTATTCAAAGATATGGTCATGAAAATTGGA  
GGGCACTTCCTAGACAAGCTGGTTTGTAAAGGTGTGGAAAAAGTTGCAGACTTAG  
GTGGATAAATTACTTAAGGCCAGATATTAAACGAGGAACTTTAGTGAGGAAGAA  
GAAGAAACCATCATTGAGATGCATCAAGTTCTTGGAACAGATGGTCTGCAATTGC  
ATCAAGACTTCCTGGACGAACAGATAATGAAATAAAGAATTTCTGGCACACTCACT  
TGAAGAAAAAATTAGAACACAATGATCTAAGAGCTACTACAACCTGCCAAGAGAAG  
CCCTCATGAAATGATACCTCGATGGAAAATAGAGCACCATATTTCTTCAAATTATCA

AGCTTCTCAAAATATTGCCAATCAATATCCAAC TTGTCATGATGAAGATCTTCAAGA  
AAATAACTCAACTTCTGACACTCAAGCAAACAAGGAGGAGAGCATGCAACCTACT  
AATACTCAAATTGGACATGACGGGGACGCTAGTATTAGCAATGATATG

>Peaxi162Scf00018g00228.1

ATGGGAAGAACACGTTGCTATGACAAAAGTGGCTTGAAGAAGGGGACTTGGA CTC  
CTGAAGAAGATAGGAAGTTAACAGCTTATGTTACTAGATATGGTAGCTGGAAC TGG  
CGTCAACTTCCCAAGTTTGCTGGATTATCAAGATGTGGGAAAAGCTGCAGACTGA  
GATGGCTGAACTATCTCCAGCCAAATATCAGAAGAGGAAATTACACCAAAGAAGA  
AGACGAGATGATTATGAAGCTTCACGCAGAAATTGGGAATAAATGGTCAGTCATTG  
CTGCTCACTTACCTGGAAGATCAGACAATGAAGTTAAGAATCACTGGCACACTTCT  
CTCAAAAAGCGATCAACACAAGAAGAATCAACCTCAAGTACTGGCTCAGAAAGG  
AGATCTAATAACAGTAAATACATCTCCAGCAGTCGAAACAAGAGAAGGGAAAATG  
GAACTCAAATAAGTGCAAACCTCTAATATTCCTCAATTGTCACCAAAGCAATCATGC  
AGTGAGCTTTCCTCTTGCGCTTCAGTTGATCAACATGTGGAAAATATGCACGCAGA  
ACGCGAGGTTTTTCAAGAAGAATATTTATTTGAGGAATCAAGTTTAATAAGCTTTTG  
GACAGAACCATTTATAGTGGATAATTTTAGTACCACAAGTGATTTTTTTTGTAAC TTC  
ACAAACTGACGGTGGACTTGTATCTCCATTTTCTCCTTTCACCCGTGTAATTTGGGT  
TATTTTTCAATTTTGTGCATATCACCCATGGCACCTGGATGGGACACCGGACAAAC  
GTGATATTTCCCTTGCTGCTCTTGTTGTGTCAAAATCAAATCTCTTGTAGAATCAT  
TTGACACAAAGCTGAAAGAGAACATGATGAATGATGAACCAAAAAAATTGATAAT  
AGAGCTTAGCGTGCTAAAGATGAAGAAATTGAGAAACCATTGTGCCCCATGTGCA  
AGGGCGGTTCGACCCAAGAGAGAGAAGTGAAAGAAATAATGGAGGAAGGCTTGAA  
AAAAGGAGAGCACCTGTCATGAATAGGCAGTCGAACAGGTGGCCGCCTCATGCAT  
AA

>Peaxi162Scf00020g02349.1

ATGGTTGGAATGATGGGATGGGGAGCTAATTCTGATCAACAAGAATGGAGGAAAG  
GACCTTGGA CTCTGAAGAGGATAAGTTGCTATCTGAGTATGTAACTTGCATGGT  
GAGGGAAGATGGAGTTCTGTATCTCGGTGTGCAGGATTGAATAGGACTGGGAAGA  
GTTGCAGGCTAAGGTGGGTGAACTACTTGAGGCCTGGACTAAAAAGAGGTCACAT  
AACACCTCAAGAGGAAGGAATTATTATTGAATTGCATGCCTTGTGGGGTAACAAAT

GGTCAACAATAGCCCGTTACTTACCTGGAAGAACAGATAATGAGATAAAAACTAC  
TGGAGGACACATTTCAAGAAGAAAGAAAAGGCTTCTTCAAAGCAAGACAAGAGA  
AAAACCTCTAAGGCAGAGAATTAATAACCAACCGCAACTACAACATGACACTAACT  
ACAAATTTTCCCCTCAACCAGAAGAAGTGATTATGCAGAATAGCGATGAAATTAAC  
GAGCACAACGACACGTTAACGTTCACTTATCATCCGAATATGGAGAATACGATCGT  
GGATTTGCCACCAGTGAGGACTTCTTCAGACATTTTCATATATATGGACTGACAATTT  
TGTGATGGATGGACTATGGGGAGGATTGTGGAACCTAGATGTGGATGATCATTAC  
AGCCAGCTAGTGACAAGTGCAAAGTGGCTATCCAAAATCAACCAACTGATTATCA  
A

>Peaxi162Scf00029g00131.1

ATGGTCCTTGGAGATGAGAAAGAGGGTATGCTCCGGAAGCAGGAGAAGAAATCCA  
AGAAAAGCAATAAGAAAGCTGCCATCAATGGTCTAGCATTGACAACAGCTGATGT  
TAAAGCTATAAAGGGTGATTTTAGTTTCGATGAAGAGAAGCTAACTGTTGTGGAGA  
CGCTGATACAAAGGGATAAGGAAGAGATGGAACTAAAGCAGCAGGAGAAATTG  
ATCAATGTGGCGTTAAGAGAAAGAAAAAGAGAGGTGGAAATCATCTTCGCAAGTC  
CAACAAGGACAGTGATGAAGATGCTGCGGAAGGTGTTGAAGAGAAGAAACATAA  
GCTGAAGAAAAGCTGCAAGGATGAGCAGCAGACAATGCAGTATGCTCCTTTAGAC  
ACTGAAAAGAGTGCTCCTGCAAGTGCGAGTGAAACATGGGACAATGACAAGGTG  
GTTGAGACCTTCGGCGTGGTCTCCAGTGGAATGCTGTGGATGAGATTAGGAGGA  
AGAATAAATCCAAGAAAAGCATTAAAGACTTCTGCCACCAGTGGTGAAGTGACAAA  
CACTGAAGTTAATCAAGGTGCTGTTTTTCCAAGTATAGAAGAGAGAGAAGAAGGA  
AGCAGAACAGAAAATGGTAATATCAGAAAGAGGAAAAATGTAAAATTAGGACAGA  
GACCTGAAGATCCTATACATGAAAATAGCGAGAAGAGAGTGAGATTCTCTGGTCAT  
GTTCAGGTTTTCCCTTCACCCAATGATCCAAGTGACGAGAAGCATGAAATCGAGG  
AAGAACTTTATTGCGCGGCAAACGATTCTCAAAATTAGAAGATGAAATTATCAAA  
AATGCTGTTTATAAATACATAGAGATACATAACATGGGTGAAGAAGGGCTCCAAA  
GATTTTGAACCTCTAGATCTCATCCTGAAATAAAGGGCTGCTGGAAAGAAATAGGGA  
GCGCTATACCTTACAGGCCTTATATTTTCGGTTTATTATCGTGACAGGTCCTGTTTCG  
AAGGTGTGAGACCCGTAAATGGACTGAAGAAGAATATGAGATGGTACGAAAATTC  
CACCGAGAACACGGGCCCAAGTGAAGGTCTTGGCTGATGAACTTGGAACAT

CGGTTTCATGTGAAGGATACATGGCGAAGATTAAAATTGTCCAATCAGAAGAAAG  
GTCAATGGACTCAGGAGGAGTACCAGACTTTGTTTGATTAGTAAACACTGATCTG  
AGACTGAAGCTTTCTGAAGACAAGAAATCTAAGTATGGGATGCTACGGGATAATAT  
TCCCTGGAGTGCAATAAGTGACAAATTGTCCACGAGAACAGCTCCATCTTGTTGCT  
TGAAATGGTATGATCAATTAACGTCTCCCATGGTAGCCAAAGGTGAATGGGCAGAT  
GCTGATGACTATCACCTAATTGATGCACTTTTTGTGCTGGATGCTAGCTGCGTAGAG  
GATGTAGACTGGGACAATCTTCTTGACCACAGGCCTGGAGAAATATGTCGAAAGA  
GATGGAACCAAATGGTTCTTCACATAGATCAATGTGGAAACAGGTCATTTGCTGAA  
CAAATAGAAGTTCTAGCTAAGAGATACCGTCCGGATCTGGCTGAAGTAAGGGAGA  
CTTGGGATAGTAAACCTATCGTTCCATGA

>Peaxi162Scf00033g00251.1

ATGGCTCAAAGAAAAGAATCATTGGATCGGATTAAGGGTCCGTGGAGTCCAGAAG  
AAGATGAGTTATTACAAAGGCTAGTTGATCAACATGGTCCAAGAACTGGTCATTG  
ATAAGCAAATCGGTTCCCGGTTCGATCCGGTAAATCATGTAGGTTACGTTGGTGTA  
CCAACTTTCACCACAAGTTGAACATCGGGCTTTTACGCCTGAAGAAGATGAAACC  
ATCATTCGGGCCCATGCTAAGTTTGGTAATAAATGGGCTACTATAGCCCGTTTATTAT  
CGGGCCGAAGTGAATGCTATTAAGAACCACTGGAAGTCTACTTTGAAACGTAAG  
TGTTGTTCTGTTTCTGAAGATTTAAGCTTTGAAACCCCTGAACAACCTCCTTTAAA  
AAGATCTTCTAGTGTTGGGCCCCGGGCCCCGGCCCGAGTAGCCCGTCTGGATCCGACT  
TGAGTGATTCGGGCCTTTCTTGTTTTCCTCAGCCACCGCTTGTTTATAGACCCGTTG  
CTCGGCCCCGGCCCGATTTTCCCACCACCCCCACCAGTTCAAATACCCAACCCACAA  
AAGCCCGACCCTAAACCCGACCCGGTTGTTCAACCCGACCCGCCTACTTCTCTTTG  
CCTTTCTTTACCCGGATCCGAAAACCAGGCTGTACAATCACCAACAACAGCACAG  
CTGCCACCTGTTGCACCACTGCCAGCTCAGCAAGGTTATGAATATGGTGGTGCCAC  
TTCAGCAACAGAGAAGCAGTTTTTTTACACCAGAGTTTTTTGGGAGTGTTGCAAGAA  
ATGATAAGAAAAGAAGTGAGGAATTACATGTCAGCAGGGTTTGTTGAGAAAAATG  
GGATGTGCATGATGCAAACCTGATGCAATAAGGAATGCAGTTGTGAAGCGTATGGGA  
ATTAGCAAGATTGAGTAG

>Peaxi162Scf00036g00710.1

ATGGGCCATCACTGCTGCAGCAAACAGAAAGTAAAGAGAGGTCTTTGGTCTCCAG

AAGAAGATGAGAACTCATTAGATACATCAGCAACCATGGCCACAATTGCTGGAG  
TTCTGTTCCCTAAACTAACCGGATTACAAAGGTGTGGTAAAAGTTGTAGGCTCAGGT  
GGATAAATTACTTGCGGCCAGATGTGAAGAGGGGTTCATTTAGTGAGGCTGAAGA  
AAGAACCATAATTGATGTTCATAGAATATTGGGAAACAGATGGGCACAGATTGCAA  
AACATTTACCTGGTCGCACTGATAATGAAGTCAAGAATTTCTGGAATTCTTGCATCA  
AGAAAAAACCTATTTCTCAAGGCTTAGATCCAAATACCCACAATCTCCTATCTCGC  
AATAGTACTCAAAACAATAAGAATAATGCAAGCTGCAAAGTCAAGTCTACCTCAGT  
TTTCACTCTTGAAACAATGCCATCAAGCAATAAAGAAGTTCCCATGGACATGATCA  
AATCAAGTCTTGCAGCTTTTCTACCTCTCCCTCATAATAGTAAAACTATTTCTACCG  
CTGCTTACAACGATAATATGAATTCCATTAATGTTCCCAGGACCACAACAAATATAG  
ATTTTCCGAGAAGTTCTTTGATGGAGAGCACTTCAAATAATTATTTATCATCTTTAAC  
TCCACCAGGGTATGGAATTATTAATTATGAGAATTATTGCATGTGGGCTGTTTCTGG  
CGTTGAACGACATGACTTTGGTCCCTCCATTAATGGACATGAAGAAATGCGCATAG  
TAGAGCAAGAAGGAGGACAAGTAGTGCAGCTTCAGGAAAAAGTGTTTCAGGCTG  
AGGAAGTCTACAAGATTAATCATGATCAGTTCAACATTAATGGACAAAAACATAT  
GTCGACGATGCTAACTTTAGTTTTGAGTCTGTGATTCTGCATTGATGATGCCTTAC  
GGAATTTACACTAGCGTAAAGTCTATAGATCACTTTGCATGGAATTAG

>Peaxi162Scf00038g01640.1

ATGGGACATCATTCATGCTGCAACAAACAAAAAGTGAAGAGAGGGCTATGGTCTC  
CTGAAGAAGATGAGAACTCATTAAGTACATTACTACTTATGGTCATGGTTGTTGG  
AGTTCTGTTCCCTAAGCTTGCAGGTCTTCAAAGATGTGGAAAAAGCTGCAGGTAA  
GGTGGATTAATTACTTGAGACCAGATTTGAAACGTGGGAGTTTCTCCCATCAAGAA  
GCTGCACTTATCATTGAACTCCACAGTATTCTAGGCAACAGGTGGGCTCAAATAGC  
TAAACATCTTCCTGGAAGAACAGATAATGAAGTCAAAAACCTTTTGGAACCTTAGC  
ATCAAGAAAAAGCTCCTTTCTCATGGAACCCTTTCTGATCATCTCTCCATGTTTACA  
AATTTCACTAATCCAAACCCTAGTCCCTCTTTTGATAATTTCTACACTCTGATCAATC  
CCAATAATCCTGTTAATTTATTGCCAGCCATAAACTCTCCCCTTATTCTACAAGTTGA  
CCAAATGAATAATGTTAATGAGGATTTGAATGCAAATTCATGGCACCCCTCCCTAAT  
CCCTTTCTCATTTGACTCAATCCCAAATGATCCTTCATGGTTTTTTAACTATCCTCAT  
TCTCAACATGATCTTGATTATAAACAAGACAACCTCCAATTCCATTGTCAGCTCGAAC



ATTCTTTGAATTACACTGATGCTGCTGGGGGGATTTTAATGGATTCAAGAAATGAT  
CCTATAAAAAGTAGTACTCATCAAGATTTATTGGTGGTGCCTAATTGCTACCTAGG  
CTTTCACCTCCTGCTCCATTGCAACAGAATTTTGA CTCAATGGTGGTTAATACTTCC  
ACAAAT

>Peaxi162Scf00038g01818.1

GCACACGTAATGATGGATGATATACTAATAAAGAAAGGGCCATGGAAAGAGGAAG  
AAGATGCAGTGTTGATAAAGCATGTGAAGAAATATGGGCCAAGAGACTGGAGCTC  
CATTCGATCCAAAGGCCTTTTACACCGTACTGGCAAGTCTTGTCGTCCTTCGTTGGG  
TTAATAAACTTCGCCCCAACTTGAAAAATGGAGTGAAGTTTTCTGCAGAGGAGGA  
GACAACTGTGATTGAACTTCAGGCACAGTTTGGGAACAAATGGGCTAGAATTGCT  
ACATATTTGCCTGGAAGAACTGATAATGATGTCAAGAATTTTTGGAGTAGCCGCCA  
GAAAAGATTAGCTAAGATTCTGCGGAACTCAGCATCGCAGCCTAGTACGCCACAA  
AAGAATAACAACAAGGAAGCCCTTGCTCTTCAAAAAGTTCCCTCAGTAGAGGAAC  
CAAAATTGAGTTCACCAGCAGAGGAAAGGTCTTTGACCATGTCCCAGTGTTGCTC  
GTCATCCTATATGAATAACTCTGACACAATCAACATGGTCCCATTGCCAGAGCTAGA  
GAATTCAACTTCACTTCCTTTTGAGCCAAACCTGCTGCAATTTGAGTTCACCTCCTA  
ATGACAAGAATTACCAGTACATTGAGACACAGATGTCACTCTCCTTTCTCAGATT  
CCACTCCAAACTGATCTTGGTCATCCATTGGGAAGTCAAGAATTACCAATGAAACT  
TGAGGAGACTGACTTGTTAGATTTTTTCGGGCAACTCAGTACTGCTTCTGACATAG  
GAAATGTGCAAGTCCCGCTTGTAACGTTGTGTTTCAGGACCAGACAAAAGCTCTGA  
AATTGTTGTGAAGAGAGAAATGGACAGCCCCCTTACACAAGATAGCTTCATCGATG  
ACCTCCCCATGGATATGTTTGATCTTATTGATCCACTGCCGAGCCCATCCGATTGGT  
GGAATAGTGATTTGTCTATTTCAGAAAGGAAAAAGGGAAATTGTA ACTAG

>Peaxi162Scf00041g01811.1

ATGGGCAGGTCTCCTTGTTGTGATGAAAATGGCCTCAAAAAGGACCATGGACTC  
CTGAAGAAGATAAGAACTTGTTGATTATATTGACAAACATGGCCATGGAAGTTGG  
AGAGCCCTTCCTAAACTTGCAGGTCTTAATAGATGTGGCAAGAGCTGCAGGTTAAG  
ATGGACTAATTATTTGAGGCCTGATATCAAGAGAGGCCAAATTCTCTGAAGAAGAAG  
AACAAACAATTCTTCATCTCCATTCCATCCTTGGAACAAATGGTCCGCGATCGCG  
ACACATTTACCAGGAAGAACAGACAATGAGATCAAGAATTTTTGGAACACACATT

TAAAGAAGAAGCTGATTCAAATGGGATATGATCCAATGACTCATAGGCCAAGAAGCT  
GATTTATTTGCAAGCTTGCCTAATATAATAGCTTTGGCAAGTTTACTTCAGCATCATC  
CACTAGAAGATCATGCTGTAAGATTACAAGCAGAAGCTGCCCAAGTAGCTAAACTT  
CAATATTTACAATGGTTATTCCAATCTTCATCATCTAGTTCAAACAATTACCCAATAG  
CTACAAGCTTAAACACTACTCAGTACAGTAATCTTGAAGATTTTGGACCATTTAATT  
TGTCAAATTCTACAAAGGAAAGTACCCCTTCTATAAACTTATCCCTACTTGAAAATC  
AAGCACTATTTTCCAATGAAAACCTCTGGCTCTCAACTGCTCCACAATCCAGATACT  
TCTCTCCCTTTGACAGACACACAAGAAGTCCCTTTCAATTTCCAAGCACATTTAAA  
TAATAATAATAATAGTAATAATACAAGTGGTGATAATGGTCAAGACTTTAATTTTGAA  
ATTTGCTCTCCAAGTTCCCCATTACATAATATTATTCCTTCTCCACCTTCTTCAAGTC  
GTTTGCCACCATTAAGTAACTGAAATTTCCATAAGCAATAATCAAGGAGATGCTAGCAGC  
ACTAATTCCAGCAATGCAGCTGAAGGGACTTCCTCATATTGGCCTGAGCTATTTTTT  
GAAGACCATTTCATGCATGAGATTGCTTGA

>Peaxi162Scf00042g02519.1

ATGGGAAGGTCACCTTGTTGTGAGAAGGCTCATACAAATAAAGGAGCATGGACTA  
AAGAAGAAGATGAAAGACTTGTAGCTTACATTAGAGCACATGGTGAAGGTTGTTG  
GAGATCACTTCCTAAAGCTGCTGGACTTCTCCGATGTGGAAAAAGTTGCCGTCTCC  
GATGGATTAATTACTTGAGACCTGATCTTAAACGTGGTAACCTTTACTGAAGAAGAA  
GATGAACTCATTATCAAACCTCCATAGCCTCCTTGGAACAAGTGGTCACTTATAGCT  
GGAAGATTACCAGGGAGAACAGATAATGAGATAAAGAATTATTGGAATACTCATAT  
AAGAAGGAAGCTTTTGAGTAGGGGTATTGATCCAACAACACATCGGCCTATCAAC  
GAGCAGCCTACAATAAGTACACAAAAAGTGACAACCATTTCTTTTGCTGCTGACA  
ATAATAAAGATGATCAAGATCAGAAGATTATTAATATCAAATCCGAATTCGAGACAA  
CGAGCAAATTACAAGATGAAATTCAAGAAAGGTGTCCTGATTAAATCTTGAGTTA  
AGAATCAGTCCTCCTCATGATCATCAACAATTTAATGATCAGAGTATTGATGAGTTA  
GGAAGAAGAACTCTTTATGTTTTGCATGCAGTTTGGGCATACAAAATAGTAAAGA  
TTGTAGTTGTAATACTAATGGAAATGGGTGTAGTAGCAATGTAAGTATGAACATTGC  
AAGTTATGACTTTTTAGGGTTGAAGACTAATGGTCTTTTGGACTATAGAAGTTTGGA  
ATCT

>Peaxi162Scf00045g00138.1

ATGGGAAGATCTCCATGTTGCACCAATAACAACCTTGAACAAAGGTGCATGGACAA  
AAGAAGAAGATGAAATACTTGGGAATTATGTGAAAATTCATGGTGCAGCAAAGTG  
GAATATTTTGTGTAAGAAAGCAGGGCTTAATAGGTGTGGGAAAAGTTGCAGATTAA  
GGTGGACTAATTACTTAAGGCCTGATATTAAGCGTGGAAATTTCTCTGAAGAAGAA  
GATAGTCTCATTATCAATCTCCATTCATCTCTTGGAAATAAGTGGTCCAAAATAGCT  
TCCCAACTTCCAGGAAGGACTGATAATGAGATCAAGAATCATTGGAACACTAAGCT  
AAGGAAGAACTTAACAAATTAGGAATTGAACCGCAGACACATAAACAGATTCCT  
AATTTCAACCTCTTTAACTCTCTTCAAATGCCTCCTCTATTTTCACAGCAAGATGTT  
ACTCAATTAGCAAAATTACAGCTCTTGCATTTTCAAACCTTTATTGCAGACCATCAAT  
GCTATTACTACTACATTTCCAAGTAACCCCTTTGATGCCAAATATTAATTATCCTATGC  
AAGATGATGTGAATGGGATCTTGAATTTTTCCATGCCCAACTTTGAAGAGGATGAT  
GATAATCTAAAGAAGGGGCCATGGACAGAAGATGAAGATGAGAACTGATTGATT  
ATATAAAGCAAAATGGCCATACAAATTGGCAATCACTCGCAAGAAAAGCAGGTTTA  
AACAGATGTGGAAAGAGTTGCAGATTAAAGGTGGAATAATTATCTTAGGCCTGATAT  
CAAGAGAGGCAGATTCTCACCTGAAGAAGAAGAGATCATTATCAATCTCCACTCTG  
ATCTTGGAAATAAGTGGTCAAAAATTGCTGCACATCTTCCAGGAAGAACTGATAAT  
GAAATCAAGAACTTTTACAACACTCATTTAAGGAAAAAGCTTCTGAGATTGGGAAT  
TGACCCCAAGACACACAAACCAATATCAAACTCAATTCTCTTGTGAATCTTTCTC  
ATCATCTTACCTCTAACTCAAACCTATTTTTTATCTTTAGCATCTGTTCTTAGTTTGCA  
AGCACAATTTTCATTACTAGCCAAAATCCAACAAGTCATACAAAGCCCCCTTCCAA  
CTATAAATACCATTAATCTATTGTCATCCATTCAAGGCAATATTTTAAGCAATTCAAG  
TCCACAACCTCGAGAGCCTTAGAAATGAGACTGAAATGTCCAAATTCTTGGATTCTCT  
CTCTAGCAAACACTACAACAACACCATGTTTGGATAATACTAATTTA

>Peaxi162Scf00047g01824.1

ATGGCACCAAATGGTGGAGGAGTGAAGACATCATTAGCAAGAAATATTAGTCATGG  
AGGGACAAGGCATGTATTAAAGAAAGGCCCATGGACAGCAGCAGAAGATGCAATA  
TTAATGGAGTATGTGAAGAAGCATGGAGAAGGGAATTGGAATGCTGTTCAAAGAA  
ACTCTGGTTTAATGAGATGTGGTAAAAGTTGTAGGTAAAGATGGGCTAATCACTTG  
AGGCCTAATCTTAAGAAAGGTGCTTTTTCTTTAGAAGAAGAAAGGCTTATTGTGGA  
ACTTCATGCTAAGCTTGGAAATAAATGGGCTCACAATGAAATCAAGAATTACTGGA

ACACAAGGCTAAAGAGAAGACAAAGAGCTGGTTTGCCTATATACCCTCAAGATATT  
CAACCACAAAACCAACATGAACATAACATCTCTTCACTATTTGATCATCCTCAAAAT  
TCCAATTTTCATCAATCCCCCTCTTTCACCTCTAGATATCTTCAATCCATCAACCATGA  
AACCTAGTGTTAATTCACAACAATATCAATTCAATAACCCTTCTCCATTTCTCACAA  
ACACCAATAATAATAACAATCACTTCAAGCTTTTTTACGACCCTCGAGTTAGCCTTT  
CTTTAACATTAGCTTCATCAATAAGGAATTCACAACCTTCTTCATTAGTCGCACCCG  
TGCCTAAAACCTTTTAGTCAAGGCTTAACCACTTCAATGCAAGTGCCACCACTTCAA  
CATAATTATCCAAGTTTTAGCACCAATACAAGACCTTATACAGCAATTTCTACGAAT  
CCAAATGGTTTAATCTTAGGCATGGGCATAGAGACTACAACATGTTCAAGAAGTAC  
AGGAAATGATTACATGAAGGCAACATCATCAAGTGATGCTGATAATTATAATGTTGT  
TGATCCTGGATTATCACGAGGAAATAGTGGACTATTAGAAGATTTATTAGAAGAGTC  
TCAAACCTTTAACAAGAGCTGAGAAAATAGAAGAGAATTGTCTTGTTGATGAAAAT  
GAGGCAAGTCAAGGGAAATTAGTATGGGAAGAATATGGATTAACCTGAAGAATCAA  
CATATAGTTTTGCTCATGGTGGTGATGATACAACCCCAAATTCATCCTCAGGAATAA  
CAACAAAGGATGCTTCATTAGAGCTGGCCAATCAAGTGGATGACGATATTATGAGA  
TTTCTTGATAATTTTCCAGTAGCAGTACCAGCTCCTGATTGGTGTGATGATGAAAAT  
GAGCAGAATAATACGTGTAATGGCCATTATTTTGAACCTCGTGACCAAATGGATTAA

>Peaxi162Scf00050g00512.1

ATGAACCCTAGAGGAGAAGACTTTTTTGGTTTTTCAAAGCATCACATCACCCACTC  
TTTCTACCTATATAAACAAGTCTTCTCTTCCAACATTTTTTCAACCAACAATTAATCAC  
AAGTTCAAGAAAATACCTTTTGGGAAGCAAATTAGTAGAAGGGAAAAAAATATTAA  
AGATGGGTAGAGCTCCATGTTGTGACAAAGCAAGTGTGAAGAAGGGTCCATGGTC  
ACCAGAAGAAGATGCAAGACTTAAGGCTTATATTGAAGAACATGGCACTGGTAAC  
AACTGGATTGCCCTTCCCCAGAAAATAGGGCTTAAGAGATGTGGAAAAAGCTGCA  
GGCTTAGATGGCTCAATTACTTAAGACCTAATATTAAACATGGTGGATTTACTGAAG  
AAGAAGACAACATCATCTGCAGCCTCTATATTAGTATTGGTAGCAGGTGGTCTATTA  
TTGCTGCACAACCTTCCTGGAAGAACAGACAATGATATCAAAAACCTACTGGAACAC  
TAGATTGAAGAAGAAGTTGCTTGGAAGAGAGAAAACAATCTCAAATGAACAGATTA  
TTGCTTGCTGGAGGTCAAGATCTTAAGGAAACAAATGGATTAGAAGAAAATTCCTT  
ACTTCAAACCTAAGCAACTCGGCTCTCGAAAGGCTCCAACCTTCATATGCAACTCC

AAAGCCTTCAAAACCCTCTTTCTTTCTATAATAATCCAGCACTTTGGCCTAAGTTAA  
CCCCTCTTCAACAAAAAATGATCCAAACCCTACAAGCTACTGGCTTAAGTATTGAG  
AATCAATCATCTCTTCTCGCACAGATATCTCCTAGTGCAAACCAAGTTGATCAACTA  
GGTCAAAAAGTTGGGATCAATGAATTTGCTAATACCATGAGTACTAGATTCAAGGT  
GAATAATGAAGTTGAAAAAAGCACCGTGAATAATGGAATATCATCTTCAGATAGTC  
CAATTGACTTTAGCAATCAAAAAGATGTTCTTGACACAAACATAGGGCAAGAAAA  
CACGGGAGAAATCCAGGGTATTCAAGGGTTTACTCAAGCCGAGATCGATGATCTTA  
TTCTCATAAACAACAAGGGATTAATAGCTGATCAATTTGATTGTTTCAAAGAGATG  
GATGGATCCTCTAGCAGGGACAACCTTGGCATGGTGGTCTAATGACTTTGATACGAA  
TACAACTTCCTCAAATTCTTGGGGTTCCTCTTCCAATAATATTGTTGAGCAGACTGA  
AGGGATGTATCAAGATTATGCACTAGGTTATAATTTGCAATGA

>Peaxi162Scf00056g00026.1

ATGGGGAGAAGACCATGTTGTGAGAAGAAAGGTTTGAAGAAAGGACCATGGACA  
CCTGATGAAGATGACAAGCTTATTGAGTATATCAACAAGAATGGTCATGGTAGCTG  
GCGTTCTCTTCCTAAACTTGCAGGTCTTCTTCGGTGTGGGAAAAGTTGTCGTCTTA  
GATGGACGAATTATCTAAGGCCGGACATTAAACGAGGTCCCTTTAGCCATGAAGAA  
GAGAAGCTTGTCATACAGTTGCATGGCATTCTTGGAACAGATGGGCTGCAATTGC  
TGCACAGCTACCTGGAAGGACAGACAATGAAATAAAGAATTTGTGGAACACTCAC  
CTGAAAAAGCGCTTGCTTTCCATGGGCATTGATCCTCAGACTCATGAACCCGCCTC  
TGCACCTAACGGACTGCTGAGAAGACCACCTGCATCACTTTCAGCCCGTCACATG  
GCACAATGGGAAAGTGCTAGGCTCGAAGCTGAGGCTCGTCTTTCCAGAGAATCTC  
AACTCTTGGTTCATCGCCGGTAGGAAGGTCTGAGACTGACTATTTTTTGCGCATAT  
GGAACTCAGAGATAGGAGATGCATTTAGAAAATTCAAGAAAGGTGCAAAGACTGC  
TTGTCATAGTTCAGCCTCTCAAGCATCTTCGTGTACTAAGTGTGGCTCAGCTTCAG  
GAATCAAGACTGAGGTTGAGCTCCGTGTTGCTGCTGGTTCCCTGTTACGGGAAG  
CAACCAAACCTGAATTTGCAGAGTGAGGAATGAACAACCACATACTGAAGATATC  
TTGCAAGGATCAGACACCTCTAGCTCCGATGCAATTGAGGATTCATCTGAATCAGC  
ATTGCAGCTTCTTTTGGATTTCCCCAGTAATAATGACATGAGCTTTCTAGGACAAAG  
TGATTCCTATAGCATGTACCCCTTTTTGACTGCAAGCTCATTGATCTGCCCTTAA

>Peaxi162Scf00058g00238.1

ATGGAGGAGGTGAAAGCTACACAGGTAACATACAGTAGCGGTATGCCAGTTACAG  
TGAAGCTCGCGGAGGACAACATAGAGATGAGGAAAGGCCCTGGACTTTGGATGA  
AGACTCCATACTCATCCATTACATCTCCCTTCTAGGTCAGGGACGCTGGGATTCGCT  
TGCTCAATTTGCCGGGTTGAAGCGTAGCGGTAAGAGCTGCAGGTTGAGATGGTTG  
AACTATTTACGCCCTAATTTACGAGGAGGAAAATTTACTCCTCAAGAGCAGCTTCT  
TATTTTATTGCTTCATTTTCGCTTTGGAAATCGTAACGACTACTACCTTTGTTTTAGA  
TGGGCAAAGATAGCAGAACATTTGCCTGGAAGAACTGATAATGAGGTAAAGAATT  
ACTGGAGAACAAAAGTGCAAAAGCATGCAAACCAGCTGCATTGCAATGTCAACA  
GCCAAGAATTTGAGACGTCCTCCGCTACCAGTGGCTGCCCTCTCTGGCTGAACA  
AATACGTGTTACACCATCGTCGTCTCTGCACGAATATCTTATGGCTTCTTCTTCTACC  
GCTCACAATAAACTACTGAAGTCAAGGAGAATATTTCTCCTTTTCTTGAACTGG  
GATTGGGTCCACTAGCATCACATCTCCGAATGTTGTCTCATCAACTAATCCTCCGA  
AGCTGAACTTCCACCACTGATGGACAATAGTCTCTGGAGCTTCTCTAGCAGTAACT  
GGTGCTCTAGCTTTGAAGATGGATACTATCTTTATTCATCTCAGGATCAGTGTCA  
GTTGGGCAAGTGTGGCAGGATCAGAACTAGTACCAGCTAATGAAACGCTAGTTTC  
GATGGGTAAAGATCTTGATCACATGGCAACATCAGTTCCGAGGACACAAAGACT  
TCTTATGATGAAGAAGTCAGAAGACAATGCATCCGGCCA

>Peaxi162Scf00065g00016.1

ATGAACAATCTTAAGCCAATTCTTGAAATTAGAGGCAACTTTGCTGAGGATGAAGA  
TGATCTCATTATTAGGCTTCATGCCCTTCTTGGCAACAGGTGGTCACTTATAGCGGG  
GAGATTGCCATGGCGCACTGGTGATGAAGTGAAGAACTATTGGAGCTCTCATTGGA  
AACAAAACTTAGGAACATGGGAATTGATCCAATGACTTATCGGATATCTGACTAT  
GTTTGTAGGAAAAGCCACCTTGACTTGTGGCATGAAAGTAGAGAGACAGAAACA  
AATGAAAAACCCTGTGATGCCAGAAGCTCTTGGGGACAAGATGACCATGAACCAA  
GTTCTTGCCCCATCTCAAGTCTTAG

>Peaxi162Scf00066g01813.1

ATGGCAGAAGGTGGTGGTTCTGGTGATGATACAAGAAGTAGTTGTCCACGAGGTC  
ACTGGCGGCCGCGCGAAGACGAAAGGCTCCGGCAGCTTGTAGAACAATATGGTCC  
TCAAACTGGAATTCTATTGCTGAAAAGCTTCAAGGAAGATCAGGAAAAAGTTGT  
AGATTGAGATGGTTTAACCAACTTGATCCTAGAATTAATAGAAGGCCATTTACTGA

AGATGAAGAAGAAAGACTTCTTGCAGCTCATAGAGTACATGGTAACAAATGGGCA  
TTGATCTCAAGATTATTTCCAGGTAGAACTGACAATGCTGTGAAGAATCATTGGCAT  
GTCCTAATGGCAAGAAAGCAAAGGGAACAATCCAAGATTTGTGGCAAAAGAAGTT  
ACCCACAAGATAATTTTCTAAGTGATTCTAAATCACCATCCTATGGCTTTCGAAGAA  
GGAACAACAACAATAATAATACTAATATTCCAAAAACACAAGAAGGTTACAACAT  
GGCACCAAATTCAGCTTATTTGAATTTCAAAACCCAACCAAGATAGGGTTTTCTC  
AGTATCCACATATTCTTCTTCCCCTTCCTGGAATTCACCTGATCAATTGTTTCGAAG  
AAATGGTAGCCATTTGCTTAAAGAAAGCTCGAATTTTTCAGGCCAAAAATCTTTAT  
GTCAAAATAATTTAAGCTTTTCAACCCATGGAGGAGGAGGAGCTACTCTATTTCCG  
GTTCTTAATAATTACAAAAAGACTACTGCTCGAAACCCTTTTAGTTATTCAAATAAT  
GGATCTGATGGCATGACTGAGAAAGTAATGAATATTAGCAATAGCACATTTTCCTTC  
AACAAGATTCTCAGGGCGAGCATTGAACAACAACGACGACAACAACAACAACAA  
CATGCAGAAGAAGCAATTGAAAAGAAGGATATTCCTTCATAGATTTTCTTGGTGT  
GGGGATTTCTTCTTGA

>Peaxi162Scf00071g00135.1

ATGGGGAGGCATTCTTGCTGTTACAAGCAGAAGCTGAGGAAAGGCCTGTGGTCTC  
CTGAGGAAGATGAGAACTTATAAAGCATATTACTAAATATGGGCATGGCTGTTGG  
AGTTCTGTTCTAACTAGCTGGGACATTCTCACAGGAAGAAGAGAATTCCATCAT  
TGAACTTCATGCACTTCTAGGGAACAAGTGGTCACAAATTGCAGCTAGATTGCCTG  
GCAGGACAGACAATGAAATCAAGAATCTATGGAACCTCTCCATCAAGAAAAAGCT  
AAGGCAAAGTGGAATTGACCCAAACACTCACAAGCCACTTTCTGAGATTGAGAAT  
GAGCATCAGAAGGCATCTACAACCAATACAAAGAACAATAATAATCAACTTCTGA  
ATGTAACAGTGCATTCAATTCTGAGAAACCAAAGCCATCTTCATTGACTATTGACC  
AAAGCTATCCACTCATTGAAACCAATATGAGCAGTAGTACTGGTTATAATCTCTCCT  
TTCAACAGTTGAATTATGAGCCTAACACCACCCTATTGAATTGCAAAACAACTGT  
AATTTGTTTGATAACAATAATGGTTTCTCATGGGGAGCTGTAGATAGTGTGAAATCA  
GAGAAAGAAGCCCAAGAAATCAAATGGTCTGAGTATCTCCAACTCCATTTCTACT  
AGGCAACACAATCCAGCAGAATCATCAAAGTACTATAATTCCTCAAGACTTGTATA  
GTGAAACAAGATCAGAAACACAGTTCGCGACACAAGGTTTCATTGAGTGCTACGTG  
GCTTCAGAGCCAACATCAGCAGCAACCTAATTCTTTACAAACTCCAGACCTGTATC

ATAAAAGTTTTCTGAGGCTTCCAGCTGCCTTTGGACAATATTCTTAG

>Peaxi162Scf00073g01731.1

ATGGATGAGATAAAGAAGGGGGCATGGTCTCCTGAGGAAGACCAAAAATTGAAAG  
CTTATATCAAGAAATATGGCATTGGAATTGGAGTCAGATGCCTAAATTTGCAGGAC  
TTTCAAGGACGGGGAAAAGTTGTAGACTTCGATGGATGAACTATCTCAGTCCTGAT  
GTTAAGAGAGGACCCTTTAGCATAGACGAGGTCGAAATAGTCATCAAAACGTACC  
AAGAACTTGGAACAGATGGTCAGCTATTGCAGCAAGATTGCCTGGAAGAACTGA  
CAACGAAGTTAAGAAGTTCTTCCACACACACTTAAAGAAGCATATGAGCTTGAAA  
AATGATCATGCCCTGATGAAGAAAAAGGCAAGAAGCAAAAGGGTTATGAAGAAA  
ACCAGAGAAAATGAGAAGACAAATACTGGCAAAGCTCAAGAAAGACCTGCAGTT  
GAAGTAGTTCCAACAAAAATTCCAATGATAGGATCATCCAGCAACAAAAATTCACC  
ATCACCTAATAGTTCTTCATCACAGTGCAACAGCATTATTACATGTCAAGAAAATCC  
AACAGACCAAGATTGCTACAACAATATTATTAGTTCATCACGTGTTGATCAACCAGT  
TATTATGAATATGGAAAGTCCATTTATATTGGAGAGCAACCCGGAAACATCTGAAA  
GTAGTCTTGGTGATACTAATTGCAATCAGCTGATCCATCAGTTTGATCAGTACCCTC  
ATGACTCGTGTAATACTATCTCCGATGGTTCGAGCTTCTTCGACTCCTTCGATCAGT  
TCGATATGATAATTTCTTTGTTCTTAACTAGTCTTTTGAACTTTAATTTGGTCATGGT  
CGCAGGTCTTTCAAGAACTGGGAAAAGTTGTAGACTAAGATGGGTGAATTATCTCC  
GGCCTGATATTAAGAGAGGACCCTTTAGCATGGAAGAAGTCGAAATAGTCATGAA  
AATGTATCAGGAATGTGGAAATAGATGGTCAACCATTGCTGCAAATTTGCCAGGAA  
GAACAGACAACGAAGTTAAAACTTCTTTCACACACACTTAAAAATGCATTTGGG  
AGTAAAAAACGACGTCACAGTGAAGACTAAGGGAAGAAGCAAAAGGGTGAAGA  
AAACCAACAAAAATGAGAAGAACTTGCCGATAATGCTCAAGAAAGATCAGCTGA  
TGTTGCTTCACCCTGCAGCAGCGTTGTTATATGTGAAGAAAATCACATGATGGATG  
TTATGGATTTCTCAAAAACATACCAAGATTGTTACAACGTTAGTTCACTTGTTGATC  
AATCAGTTATTAACATGGAAAACACGGTAATCTTGGAGAGCAATCCTGAAACATCT  
GAAACTATTGATGCTGCTAACTGCCAACTTCATCAATTTGATTACTCCACCTATGT  
TCTAGCCTTTTTTGATGATCATAGATTTAACTCCTTAGATATGAATTCATTTTGGTCTG  
AT

>Peaxi162Scf00074g00355.1



ATGGGGAGAGCACCATGTTGTGTTAAAGAAGGTCTACGAAAAGGTCCATGGTCTG  
CAAAAGAAGACTCATTACTTACTAATTATATCAACCAACATGGTGAAGGACAATGG  
AGATCTTTGCCAAAGAATGCTGGTAATCGTTGGTCACTAATTGCTGGAAGATTACC  
TGGTCGTACTGATAATGAAATCAAGAATTATTGGAATACACATTTACTCAAAAACT  
CAAAAGTGTTGGAATAGTTCCAAAACCCACAAAATATTCTCCAAAAAAGCTAGT  
AAAAAAGGTCAAAGTATACAAGTTGAGAAGACTAAAGTATATGTACCAAAGCCTAT  
AAGGATTTCTTGTGGAATTTCAAGAAACAATAGTTTTGAAAATGTTACATTTAGTAC  
TACTTGTCCTCTAATAGTTATGAAGATGTTGATGTTGAAATTGAAAATAATAAAGA  
TGGTATTATGAATAATGAAAATGAGGTCAACTTTGATATTTGTGATGAATTTCTTATG  
GAAGATTGGTGCCACTTTTCAAATAAAGGTTCAATTGCCAATGAATGAGAGTATGGT  
AGATAAAGTCTATGAAGAATATCTTCTACTTCTTTCTGAAAATTGTTATCTTCAAGA  
AGATCAAAGGGAGCATCCTTTAACTGGAAATGTCTCTGAGTTA

>Peaxi162Scf00074g01820.1

ATGGGACACCATTTCATGCTGCAATCAACAAAAGGTTAAGAGAGGACTTTGGTCTC  
CTGAAGAAGATGAAAAGCTCATCAGATATATTACAACCTCATGGCTATGGCTGCTGG  
AGTGAAGTCCCTGAGAAAGCTGGGCTTCAAAGATGTGGCAAGAGTTGTCGCTTGA  
GATGGATTAATTATTTAAGACCTGATATAAGAAGAGGAAGATTTAGTCCAGAAGAG  
GAGAAGTTGATTATCAGTCTCCATGGTGCTGTAGGCAACAGGTGGGCACATATAGC  
AAGTCATTTACCTGGAAGAACAGATAATGAGATAAAGAATTATTGGAATTCATGGA  
TAAAAAAGAAGCTAAAAAAGCCTTCAAAACCATCAACAAACACAACCTTCTTGTAC  
TGAACATCAGCAGCAACAAAGATCCCAATTTTCTTATAACACAACAAGTCAACCA  
GAAATTTTATTACACAAGATCTTGGAGTAACAAAGTCTCAGATTCTTCAAGATTCT  
GCCCTTTTCACTTCTCCAAATCCTTTGTTCTATTTTGATAATGGTAATTCCTCGAAA  
CAATGACAAATAATGTTAACGATCGAAGTACTAATGCCTCATTATTTCAAGAAACAT  
CGGTGTTGAACTCAGAATTCTGGCAAGTTGACCTACAACAACAAGTACATACATCG  
TATACAACGGGAATTCATTGCAATTATTTGCCACCATTATTAGAGATGCCACACATG  
GAAATACCTAGTAGTAACAATAACATGATGGTGGGAAGGACAAGATCATCATCAATT  
AAATGAATGGAATATGGATACACAACAATGTTGTCCAAGTTATCTATTTTGGGATCA  
AGAAACAGGAACACTTGGTGGTGATCATGAGTTTGTAGACCCAAACAATACATCA  
ACAATATTGGACAGATTTTATCTTCTTCCCTTCTTCTTTATGA

>Peaxi162Scf00078g00024.1

ATGTGTAGCAGGGGCCATTGGAGGCCTCACGAAGACCAGAAGCTCAGGGAATTAG  
TGAAAAAATATGGACCTCATAATTGGAATGCTATAGCAGAAAAGCTTCAAGGAAGA  
TCAGGGAAGAGTTGTAGGCTGAGATGGTTCAATCAGTTGGATCCAAGAATCAATC  
GAAATCCTTTACAGAAGAGGAGGAAGAAAGGCTTCTTTCTGCTCATCGAATTCAT  
GGCAATAGATGGGCTATAATAGCTCGACTTTTCCCTGGTCGTACTGATAATGCTGTC  
AAGAATCATTGGCATGTTATCATGGCACGAAAATGTAGAGAACGGTCCAAGATTTA  
TGCGAAAAGAGCCACTGCTGCTAGTGCTACTACTATTGCTCATCAAAAATCAACCA  
GCGATGAGCAAGAATTATCGTCATTGATGCAGCAAGATAAAAGGCAAATAAGTAAT  
GAGCACACTACAAGAAGCTTCAATCCTTTTCGTTGATGCTCATCAGCAATATTTTTTT  
TCAGAAAGATTTGCTTACCCTTGTAATTTGACGTACAACCTATTCCTTGTATCCAAAG  
CTGCTTCACAAGGACTACCTTTTTTCATCATGCGAAGGTGAATCAAGATGAAAAGCA  
ACGGACGGAGTTCTATGACTTTCTACAAGTGAACACTGACTCAAACAAAAGTGAA  
GTGATAGACCATATTAATGCTAGTGCTAGAATAATGAGAGATGATGAGGAAGTTGA  
ACAGGAAGCTGTTGACCTTCATCGGAGCAAATCCAGCAGAGGATTCATAGATTCT  
TATCAGTTGGAGACTCAATCTAA

>Peaxi162Scf00080g00064.1

ATGGATAAAAAACCATGCAACTCTCAAGATGCTGAAGTGAGGAAAGGACCTTGGA  
CTATGGAAGAAGATTTAATTCTCATAAACTACATTGCTAATCATGGTGAAGGTGTTT  
GGAATTCCTTAGCTAAATCTGCTGGTCTCAAACGTACCGGGAAGTTGTTCGGCTT  
CGGTGGCTTAATTATCTCCGGCCTGATGTCCGGAGGGGCAATATTACACCTGAAGA  
ACAACCTTTTGATTATGGAAGTGCATGCTAAGTGGGGAAACAGGTGGTCGAAAATT  
GCGAAGCATTTCCTGGAAGAACAGATAATGAAATAAAGAACTATTGGAGGACTA  
GAATTCAGAAGCACATTAAGCAAGCAGAAACCATGAATGGACAAGCAGCTTCTTC  
AGAGCAAAAATGATCATCAAGAAGCTTGCACTAGCCAAATGTCTAATGGTCCAAATG  
ACAATACCATTGATCAGACCTACTCTCCCACTTCATACTCTGGAAATGTGGACACTT  
TCCAAGCAGGCCCTAATTTTCTCACTGAAGCAAATGACAACATGTGGAGCATGGA  
AGACATCTGGTCCATGCAATTGCTTAATGGTGATTAA

>Peaxi162Scf00088g01621.1

ATGAAGGATAAAGAAGTTAAAGCAAGAATGAAGAGAGGATTTTGGAAACCTGAA

GAGGACTTGATATTGAAGAATTGTGTGGAGACTCATGGAGAGGGAACTGGGCCA  
CCATTTCTGAGAAGTCAGGCTTAATGAGGAGTGGCAAGAGCTGCAGACTAAGGTG  
GAAAAATTACCTGAGGCCAAATATCAAGCGAGGAATGATGTCTGAAGATGAAAAG  
GACCTCATCATCAGACTACATAAGCTTCTAGGCAACCGATGGTCGCTAATTGCAGG  
TAGGCTTCCTGGAAGAACGGACAATGAAGTAAAGAATTTCTGGAACACACATTTG  
AACAAGAGGTCTTGTAAGGCAAAAAGAAACACAATAAGGCAGAGGAGGCAAAT  
CATCAACGCAAAAACGATCGAGAATACCCTGCTGAGACAGCGAGGAACCAAGAA  
GTGGCTACCAAAACAGTTTTAGATTCATGGATAGAAGAAATGCAGGACTTCAACTG  
CAGCCTACTATCACCTCTGCCAATGAATAGCGTGGCATTCTCCAAGATGAGCCTTT  
CTTCCCCATATTGGACGACATTGTTTTGCTTGAAGCATTACAAAGCACTGGCAAAG  
AAGTGTGGCCTGACATTCAGCCATTCCTTTAG

>Peaxi162Scf00089g01411.1

ATGGGGCGCCATGCTTGTTGTGTGAAGCAGAAGCTAAGGAAAGGATTGTGGTCAC  
CAGAAGAAGATGAGAAATTGTGCAATTATATCACCAAATTTGGTGTGGCTCCTGG  
AGTTCAGTCCCTAAGCTAGCTGGGAGAACAGATAATGAGATAAAGAATTTCTGGA  
ATTCGAGTTTGAAAAAGAACTAATGAAGCAGGGGATTGATCCAAACACCCACAT  
GCCACTAAGTGAAAATACTCAAGTAAGAGATGAAGAGAATTGTACAGATAAGACC  
TCAATGTTGCAGATGCCACATCTTAATGGACTACCTTCAGCTGAAATGGACCAAAC  
ATTCACACGACTAATAGAAGTTTCAACACAGAGGCAAAAAATGGACATTTAACA  
GAAGCTTCAAAGGAAGACCAATTTGTGAGTAAACAAGTTTTTGATATTATGTTTCT  
TCATGGATACCAATCCAATGTGAATCCCAGCGCGTATGATTCAGAAGTATTAGCTCA  
ATACCAGCAAATTATTAGATCTTATGATCATCCGAGCGAATTCGAAGAAAATCCAAA  
TTATGGGATTTGTTTCAGAGACAAGTTTAACAAAATTTGAACATGGACAGACGACA  
GAAACTGATTTTGCTAGCAGCTCAAGTAACAGTTCAAATATTTGTGGCTATCAGAA  
TAATGCTACTAGAATTCGGACTAATGGAATGCTGGAAATTAATGAAACCTTGTCATG  
GGATGTGGAGAACAAAATGGAATCTATTTTCCAGTATCCTTACATTGAAATCAAGA  
ATGAAGAATTAAAGCAAAGACCTGGAGATTTAGTAATTGTCCATTGAGTTGCTTA  
ACTGAAGAGTTATGTGGGGCAAATCTAGATGTCATCCAGCAAATTTAA

>Peaxi162Scf00090g00168.1

ATGGGAAGGTCTCCTTGCTGTGAGAAAGAGCACACCAATAAAGGGGCATGGACTA

AAGAAGAAGATGAACGCCTTACTAAGTATATCAAAGAACATGGTGAAGGATGCTG  
GAGAACTCTCCCTAAAGCTGCTGGTTTGCTTAGATGTGGAAAGAGTTGCAGACTC  
AGATGGATTAATTACTTGAGACCAGATCTTAAAAGAGGAACTTTACTGAAGAGG  
AAGATGAACTTATCATCAATCTCCACAGCTTACTTGGAAACAATTCTACTAATTGA  
ACAAGAAGATCACTAGCACAACTGCAGGTGCATCTACAACCACAAGTCAGTGTTT  
TCAACAACTCCAAGCTCATAGTAGTGGGACGTTGTTGTGGACAAGATCGGGATTA  
AGCGACAGCATTATAACAACATTTTCATTAGTTCTATGGTCAAGAGTGATTTCGGCA  
GCAGAGGATTCTAACAGCAGCAGTGATTTATCAGAAGAAATGGTGCACCCACATCT  
CAACCTTGAGCTCTCCATAAGCCTACCCCAACCCCTAGAAGGAAAGGAATTGAGA  
AAAGAGGAGCAGCTATTTACGAGCCATCGTTTACCAGTGCCAGTAGTGTTACTCA  
ACCA

>Peaxi162Scf00096g01718.1

ATGGGTAGAGCTCCTTGCTGTGACAAAGCCAACGTCAAAGAGGACCATGGTCAC  
CTGAAGAAGATGCTAAGCTCAAAGCCTATATCGAACTACATGGCACTGGTGGCAAC  
TGGATCACTCTTCCTCAGAAAGTAGGTCTCAAGAGATGCGGGAAGAGTTGTTCGGC  
TTAGATGGTTGAATTATCTCCGACCAAATATCAAGCACGGAGAATTCAGTGAGGAA  
GAAGACAACATAATCTGCAGTCTCTATATCAGTATTGGCAGCAGGTGGTCTATTATT  
GCTGCTCAATTACCTGGACGAACAGATAATGATATCAAGAACTACTGGAATACAAG  
GCTGAAGAAAAAACTACTAGGCAAACAGCGAAAGGATCATCGTCATCATAAACTA  
GAAATGATGAAGGAGAACGAAAATTATTTTGCTAGTCAAGATATCAATGCATATTCT  
TGGCCTCCACAACCACTACTATTCTCTTCACTAGTTGCACCAACAAATGAATATCAA  
CAATCTGGAAGCAGTGGAAACAGGCACAACCTTTCAGTACTCCACTGAGGTTTCAG  
CCCAATTTGACCCGTCCAAATTCAGCCAAAGTTCAGCATTGTGAATCCATTGAGT  
GGTAATACTTGTAATTCATTAAGTTGCTATTACCCCATAGCAATGGAGTTATCACA  
AATAGTTTCCAAGAGTACAATAATTACATTTCTGTTGGGCTGGATCATGACGTGCTT  
AACGTGAGTAATCTTCAACAAGTAGATCAAAGTGTAATTGAAATGGTCAACAGCA  
GCAGCACTATTATTAGCACCACATCACCAGAAATTAGTACAAGCTGGGAAGAATTG  
AGTCCTATTGTTTTTCTCCATCAGTATCCAATTCGAAATTCAGCAAGAAATATCA  
CCTATTTTGTATTTGAAGAGCCAAGGTACTTGGGTTTGTTGAAACAGTAA

>Peaxi162Scf00102g01226.1

ATGGGAAGAAAACCTTGTTGTGACAAAGTTGGAGTGAAGAAAGGACCATGGACA  
ACTGAAGAAGACAAGAACTCATCAGCTTTCTTGTACAAATAATATTGGCCAATG  
TTGCTGGCGTTCTGTCCCTAAACTTGCTGGCCTTCGTCGTTGTGGTAAGAGTTGTC  
GTCTCCGTTGGACTAATTACCTTCGTCCTGACTTGAAAAGAGGCCTTCTTACTGAA  
GCTGAAGAGAATTTAGTCATTGATCTCCATTCTTGTCTTGGTAACAGGTGGTCTAA  
AATTGCTGCAAGATTACCAGGAAGAACTGATAATGAGATAAAAAATCACTGGAAC  
ACTCATATCAAGAAAAAGCTTCTCAAGATGGGAATTGATCCTGTTACTCATGAACC  
ACTGAATAAGGAAGAAAAGTCAAGAGATCAAAGTACCAAAACTGATGATATAGAT  
AATAAACAGAATGGTCATGATGATCAGCAGGTCCATGTAGTACTAGAGAGTACAAA  
TGTTACAGCAGCAGCCACCTCCTTAGAACTAGAAAACATCATCATTATGTTTCATCATC  
ATCTTTTTCCCCTAATGAAAACCTTCTTGCATCACTGATGAATCCCAGATGGTTCT  
TGATACCTTTAGTGAAAACAATCCACTATTAAGCTCCATGCTGCATGTCGATGCTCC  
TCTCATCGACTTCCAATGGGAGCTTTCAGCTTCTGGTACTACTCAAAAGCAGAATC  
TCGATAATGAAAATTTCAATTGGCTAGTGGATTGTCAAGATTTTGGAATCCATGACT  
TTGACTTTGATTGCTTCAACATGGAAATGGAGTACTTCTTGGACAGTATTGGTGATA  
TTAAGAATGAAAAGTAG

>Peaxi162Scf00102g01858.1

ATGGGGAGAGCACCATGTTGTGCTAAGGAGGGGTTGCGTAAAGGTCCTTGGTCTG  
CTAAAGAAGACTTGTTGCTCACCAATTATATCAAGGAACATGGTGAAGGCCAATGG  
AGGAGCTTGCCCAACAAAGCTGGGCTTCTTAGGTGTGGAAAGAGTTGTAGGCTAA  
GATGGATGAACTATCTAAAGCCAGGGATCAAGAGAGGAAACTTGAGCCAAGATGA  
AGAAGATCTTATATTAAGGCTGCATTCACCTTTGGGCAATCGTTGGTCACTCATAGC  
TGGAAGATTACCAGGTCGAACTGACAATGAAATCAAGAATTATTGGAACACTCATC  
TCATCAAGAAGCTCAAAAGTGCTGGAATTGAACCCAAAGTTAACAAGAGTTTCTC  
CAAATACTGTTCCAAAAAGCAAGCCACAACAGACAAACCAAGAAAGAAACAAGT  
GAAGAAGAAGAAGAACAAGATAAAAGACCAGCCTTTAGTACAAGACACTAG  
TGAGCCTCCTCAAGTTGTATTTATCCCAAAACCAATCCGAATTCCTCTGGACATTC  
GAGGAATTATAGTGTGGATCAAAATGTTGCATTGAGTACTTCATCCTCAAACAGTG  
CTGATAACAACAACAATATTAGTAATAATGAGGGTAAACAAGCAGAGGTTTCATTC  
GATCCACTCTTTGATGAAGTTGTTCTGGATGGATGTTGTGAACTTTCACCCGAATG

GTCATTACCAACGGATGATAGTATGCTGGAAAAGGTGTATGAAGAGTATCTTCAGC  
TTATTTCTGAAGAATGTTTTCTTCAATTAGATGATCCTTTGGCTGAGAATGCCTCTC  
ATCATCCAATGTTAATGTAG

>Peaxi162Scf00110g00004.1

ATGCAAGAACAGGGACAGCGCAGAGGGCAATGGCTTGAAGAGGAAGATGAGAGA  
TTGGCTATGATTGTAGCCAGTTTGGGCGAACGGCTGAGGAGGAGTGGGAAAAGCT  
GCAGGCTGCGATGGTTAAACTACCTCCGTCCCAATCTAAATCATGGTCATATTACTG  
AAGATGAAGAACGTTTGATAATTCAACTTCAGAAACAGCTTGGAAATAAGTAA

>Peaxi162Scf00114g00127.1

ATGGGGAGAGCTCCTTGTTGTGATAAAGCTAATGTGAAGAGAGGGCCATGGTCAC  
CTGAAGAAGATGCTAAACTCAAAGAATTCATAGAAAAATATGGAAGTGGTGAAAA  
TTGGATTGCTCTTCCTCAAAAAGCCGCTTATACACCAACATTGGAAGCAGGTAAAA  
AAAATATATCATATATTGAAGTTAAACTCATACATTTATGTGACAGGTGGTCAATTAT  
AGCTGCTCAATTACCAGGAAGAAGTGAACAATGATATCAAAAAGTACTGGAATACAA  
AGCTCAAGAAGAAGCTCATGGGTTTAATGCATTCATCAAACCAGAGAAAATCACC  
TTTCTTTTCTTCTACAACCTTTCAAACCTATTACACCAACGCAGCCCCAAACAATTTT  
AAGTCTTTTTTAGATATTCATATCAAGAGCCTAATATTTTCATCAGTCCAACCAAATTTT  
ATGTACAACAATAATCACATGAACTTTCAGTTAGGTACAAACAATCAATATTCTTAT  
TTCCATTGTCAAGAGAGCTTAGTGAATCCCATTAAGCAAGAGGAAATGGGTAAATTG  
TTTAGAGGGTCAAACCTCCGAGAACTTTCGATCATGAAACGCAAAAGTTCACCCTT  
GATTATGGTAACAATATTGGAGGTGGTGGTGATCACAATCTTAGCGCTTGGGCTCAT  
GATCAAAAGCCAAATGGATATCTTGCGAACAACCTTCCAAACTCAATTTTCAGTATGA  
TGTTGAAGAAATTAAGGAGCTAATTAGTAGCTCTAGCAATGGAAGTGGATGTAATA  
ATAACAGTAGTTTGTTATTCGTCAATGATGAAAACAAGCCAAATGAGAGAGGAATG  
TTCTATTATTGA

>Peaxi162Scf00118g00310.1

ATGAGTACTTCTAATGCATCAACATCAGGAGTAAGGAAAGGTGCATGGACCGAGG  
AAGAAGATCTTTTATTGAGAGAATGCATTGAGAAGTATGGAGAAGGGAAGTGGCA  
TCTAGTTCCGGTTAGAGCTGGTCTGAATAGATGCAGGAAAAGTTGCAGACTTAGGT  
GGTTGAATTATCTAAGGCCACATATAAAAAGAGGGGACTTCTCTTTGGATGAAGTA

GAGCTTATTTTGAGGCTTCATAAGCTTCTAGGCAACAGATGGTCACTTATAGCTGG  
AAGACTTCCGGGAAGAACTGCAAACGATGTCAAAAACCTATTGGAACACGCACCTT  
CGAAAGAAGTTAATTGCTCCTCATGATCAGAAACAAGAGAGCAAGAGCTAG

>Peaxi162Scf00125g01321.1

ATGCTTTGTCAATTAATGAGTAGTGAGCAAATGGGCAGCTGGGGAGTCATAGAAG  
AAGGGTGGAGAAAAGGCCCTTGGACTGCTGAAGAAGACAAATTGCTCATTGAATA  
TGTC AAGTTGCATGGTGAAGGCAGGTGGAATTCTGTTGCTAGGCTTGCAGGGTTG  
AAAAGAAATGGAAAAAGTTGTAGGCTGAGATGGGTAAATTACCTGAGGCCAGACT  
TAAAGAGGGGTCAAATAACTCCACATGAAGAGAGGATCATTCTTGAGCTTCATGCT  
AGATGGGGAAATAGATGGTCAACTATTGCTCGAAGCTTACCAGGGCGAACTGATAA  
CGAGATCAAGAACTACTGGAGGACACATTTTAAGAAAAAGGCCAAGAACTCTAGC  
GCTAACTCTGAAAAATCACGAGCACGTCTCTGGAAAAGACAACAATTCCAACAAC  
TGCAACAGCAGCAGCAACAACAACAACAACAATCAACGATCACATCGATATCAA  
AAAGATGATGTCGTTATTCGATCAGAATGAGAATAAAGGGCAGCTTATGCCACAAG  
GAAAGCAAGAAATGGCCATGTTGTACCCAAACACA ACTAATCAACAAGAACAAGT  
TGGCTTATTCTACTCTATGCTCAATGGATGTGCTTCAGTATCACTGCCTGAGCCCTC  
TTCTAATGAAGACACCATGTGGGATGGCTTATGGAATTTGGATGACTTTTATGGCCA  
TTTCATCAATACTAGTACA ACTTATAACAAAGCTACTCCTTGCTTGCAA ACTATGGC  
TACTATTCCTCCAGCTTTCTATTGA

>Peaxi162Scf00128g00742.1

ATGGGAAGACAACCTTGTTGTGACAAGATTGGACTCAAAAGAGGTCCTTGGACAA  
TTGAAGAAGATCATAAGCTTATGAATTTATCCTCAACAATGGTATACAATGTTGGC  
GTCTTGTACCAAAACTAGCAGGGCGCACGGACAATGAAATCAAGAACCATTGGAA  
TACAAGAATCAAGAAGAAGCTAAA ACTCCTTGGCTTAGATCCTTTAACTCACAAGC  
CAATTGAACAATTTGATCATTGAAAAATGATGATATTGAACAACAAGATTCTTCAG  
AAAAAGAAGAGAAGGAGAAGTTGGAATTGCTAGAGAAGAATTTACCTAATTCTTT  
GGATTATACACAAGAGCAAGAGATTCAAAATTCAACATCTAGTTCAAGTTTAGATG  
ACATGAATAATTTCCAAAATTCAGAAAGTTTGGAGACATTTTCCAAAGAAATGTTT  
AATTCAGGACTTGAAGATCCTTTCCAGAATTGGATA

>Peaxi162Scf00129g00228.1

ATGGGTAGACCACCTTGTTGTGATAAAATAGGTGTTAAGAAAGGACCATGGACTCC  
TGAAGAAGATATTATGTTGGTGTCTTATGTTCAAGAACATGGTCCAGGCAATTGGA  
GAGCTGTTCCCTAATAGTACAGGGTTGAGAAGATGTAGCAAGAGTTGTAGGCTAAG  
GTGGACTAATTACCTTAGACCAGGAATCAAGAGGGGTAGTTTCACTGATCAAGAA  
GAGAAGATGATTATCCAGCTTCAAGCTCTTTTAGGCAACAAATGGGCTGCAATAGC  
TTCATATCTTCCAGAGAGAACAGACAATGATATTA AAAACTATTGGAATACTCATTT  
AAAGAAGAAGCTGAAGAACTTGAAGCTGCAAGTTGTGGAAGTGATTTATACTCT  
AAAGATAGTTGTTTATCATCTTTAAGCTCAACCTCAAAGGGCCAATGGGAAAGGAC  
ACTTCAAGCTGATATAAACACAGCCAAATTAGCTTTACAAAATGCCCTATCACTTG  
AAAAACCAAGCGCAATTCAAGAATATATGGCAACTGATGTGAAGCCCCAAAAATATT  
TGTTACCCATACATAAAACAAGAGGGTAACAATTCTACTTCTACTTATGCATCAAGT  
GCTGAAAACATAGCCAAATTACTCAAACAATGGACCAAAAGTAGCTCATCAACAA  
ACAATTCTGAGAATTCAAAGGGTTCGTCTAGTACGCAACTCTCGTGTAATTACAAC  
AATGCCACTAACGACTTCGAGTCGATATCAAATTCGAGTCATTTGAACAGTCAAA  
ATCAGATCAATTTTCACAAGCTACAACACCTGAGGAGAGTAAATTTTATGGTGAAA  
GCAAGAGAGAATTGGATGATCAAGTTCCATTGTCAGTAATGCTGGAGAATTGGCTA  
TTTGATGAAAATGAAGATTTATTTTAG

>Peaxi162Scf00129g01231.1

ATGGATAAAAGAACATGCAATTCTCAAGATGTTGAAGTTAGGAAAGGTCCTTGGA  
CTATGGAAGAAGATTTAATTCTTATAAACTATATAGCTAATCATGGTGAAGGTGTTTG  
GAATTCCTTAGCTCGATCTGCTGGTTTAAAGCGTACCGGAAAAAGTTGTCGACTTC  
GGTGGCTAAATTATCTCCGGCCAGATGTCCGGAGGGGAAATATTACACCTGAAGAA  
CAGCTCTTGATTATGGAAGTGCATGCTAAGTGGGGAAACAGGTGGTCAAAAATTG  
CAAAGCATTTGCCAGGAAGAAGTGAATGAGATAAAGAATTATTGGAGGACTAG  
GATACAGAAGCACATTAAGCAAGCAGATCAAAACATGAACAAATCATCAAAATGT  
GAGCAACACAATGATCAACAAGCAATTAGTACAAGTCAAGCATCTACTGGTCCTAC  
AGATACCATTGACTCCTATTCTCCACCTTCCTACACTGGAGATACTAATAATAATATG  
GGAAATATTACATTTCAAGGCAATTTTCCAAGTGAACAAATGAAAATATTTGGAG  
CATGGAAGATCTCTGGTCCTTGCAATTGCTTAATGATGCAACCAACTAA

>Peaxi162Scf00132g01412.1



ATGGGGTGCAAGCAAATGGACAAGCCAAAGCAAAAACACAAGAGGGGATTATGG  
TCTCCAGATGAAGACCAGAAGCTCAAAGATTACATCCTCAGGCATGGTCATGGCTG  
TTGGAGCTCTGTGCCCATCAATGCTGGCTTGCAAAGGAATGGAAAGAGTTGTAGA  
CTAAGGTGGATTAATTACTTAAGGCCAGGCCTAAAGCGAGGGACCTTTAGCATTGA  
AGAGGAGGAAACAGTCCTGACCCTTCATGGCGTGTTTGGAACAAGACTGATAAT  
GAGATAAAAAACCACTGGCACTCTTATCTAAAGAAGAGAGTGATCAAAAAGGCAG  
AAAATGAAGGAGATGCTAGATCTGGATACTCAAGTCCACAAATAGGAAATGAAGA  
ATCTTCACATTCTTCTATGAAATTGGCTTCCCAAAATTCAAGTTTGGACTCATTTGA  
ACACATAGAATGTTTATTATTAGCAGACACAGATCAATCTTCTTCCCTACAGGTTGA  
CTTTGCAAGAGAAAATTGCAAAAGCAATTTACCCAGAGTATTATTCTCTGAGTGGC  
TTTCATTTGATCAACTTAATGGCCAAGATTTCAAGAACTCAAGCAATCAAGAATCC  
AAGAACAATTTTGGCTACAACAATTCAGTGTTCCAAGACTCTTGCATGCATGGTCC  
ACTCATGAATGACATAAATCAAGCGTTAAACAGAGGGATGGTAGACGATATGTTTC  
AACCAACATTGGAATTTGAGGATCATATCTCTGCTGATGGTTTTGAGGAACTTATAT  
CAGGGGAGTTCAATATAAATGGAGATATGATGTACATATGA

>Peaxi162Scf00134g00189.1

ATGGGGAGACAACCTTGTTGTGACAAAGCTGGAGTAAAGAAAGGACCATGGTCA  
GCTGAGGAAGACAAGAACTCATTA ACTTCATTCTTAATAATGGCCAATGCTGCTG  
GAGAGCTCTCCCTAGACTTGCAGGGCTAATGAGATGTGGAAAGAGCTGCAGATTG  
AGATGGACAAATTATCTGCGACCAGACTTGAAGAGGGGACTTTTGT CAGGATATGA  
AGAGACGATGGTCATTGAACTTCATGCACAGCTTGGCAACAGGTGGTCCAAGATT  
GCTTCTCATCTACCAGGAAGAACTGATAATGAAATCAAGAATCACTGGAATACACA  
TATCAAGAAGAAGCTGAAGAAAATGGGAATTGATCCAGTCACTCATAAGCCAATTA  
CTAGTGATCAACCAAACATAGAACAGCCAACAAAAGACCAGCCAATTACTAGTGA  
CCAACCAACCATAGAACCAACAAAAAATCAACAAGAGAAACAAAACATAAT  
GCCACCTTCCACAGTTCATGTTGTCCAAGAAATGGATATTGATCAGAACAAGGAAT  
TGGTTGAACTCCTATACAATCAACAGTTACAGTAACAAAATTAGAAGAAGGGAC  
AAGTCCAAAAAATATGGAGCCAATTCAAGTCAATAATGGATTTTGTACAGATGAAG  
TCCCTTTAATTGAACCACATGAAATTTTAGTCCCTTCTGAATCAACCCCTTCAACAT  
CATCTTCATCTTCTTCTCCTCTTGAAGACATGCAATTCTTGCCAAGTTTTGATAA

TTGGCAATGTGATTTCAACAATATGGACAACATTGGTATTAATTGGGCACATGATTT  
CAGCAGCACTTTGGATTATTTACTTAATGATGATGATAATGACATGAAAAATATTAGT  
CTCCAAGATTGGTCACAGGTGTTGGAAGTTTGA

>Peaxi162Scf00135g00313.1

ATGAGGATTATGATTAAGGGAGGTGTTTGAAAAACACCGAAGATGAGATATTA  
AGCTGCTGTTATGAAATATGGGAAAAATCAGTGGGCCCCGTATATCGTCGTTGCTGG  
TTCGTAAATCTGCTAAACAATGTAAAGCTCGTTGGTATGAATGGCTCGATCCTTCTA  
TTAAAAAGGCCAAAAGATGAGAACTACTTCACCTTGCAAAGCTCATGCCACACA  
ATGGAGGACAATTGCGCCAATTGTTGGTCGTACACCATCCCAATGCCTTGAGCGAT  
ATGAGAAGCTTCTTGATGCAGCATGTGCTAAGGATGAGAACTATGACCCTAATGAT  
GATCCGAGAAAATTGCGTCCTGGAGAGATTGATCCTAATCCAGAATCAAAGCCTGC  
TCGTCTGATCCTGTTGATATGGACGAGGATGAGAAAGAAATGCTTTCTGAAGCAC  
GGGCTCGATTAGCCAACACAAGAGGCAAGAAGGCTAAAAGGAAAGCCAGAGAAA  
AGCAGCTCGAAGAGGCTCGCAGGCTTGCTTCTTTACAGAAAAGGAGAGAACTCA  
AGGCAGCTGGAATAGATGCTCGTCAAAGGAAGAGAAAAAGGAGAGGGATTGATT  
ACAATGCCGAAATCCCTTTTGAGAAGAAGCCTCCTCCAGGTTTCTATGATGTTGCC  
GAGGAAGACCGTCCAGTAGAACAGCCCAAGTTTCCAACCTACCATTGAAGAACTTG  
AAGGTGAAAGGAGAGTAGACAGGGAAGCTCGTCTAAGAAAACAGGATGTTGCAA  
GGAATAAGATTGCACAAAGGCAGGACGCCCCTACAGCCATACTGCATGCAAACAA  
ACTTAATGATCCAGAAGCAGTGAGGAGGAGGTCGAAACTCAATCTTCCTGCACCG  
CAGATTCCAGACCATGAATTGGAGGCCATAGCGAAGATAGGTATTGCCAGTGATCT  
ATTAGGGGGTGATGAGCTCTCCGAAGGGAATGCTGCAACGCGTGCTCTCCTAGCA  
AATTATGCCCAGACACCACAGCATGCAATGACTCCTATGCGAACACCTCAGAGAAC  
CCCTGCAACTAAGCAGGACGCTATTATGATGGAAGCGGAAAATCAGCGGAGGTTG  
AATCAGTCTCAAACACCATTACTAGGAGGGGATAATCCTATGTTGCACCCATCAGAT  
TTTTCCGGTGTCCTCCCAAGAAAAGGGAAGTGCAGACCCCAAACCCCTCTTAA  
CCCCTTCAGCAACTCCTGGAAGCTCGGGACTTACTCCTAGAATTGGCATGACACCA  
TCAAGGGATTCTTATGGCATGACCCCAAAGGAACTCCTATGAGGGATGAGCTACA  
CATTAAATGAAGAAATGGATATGCACAATAATGCTAAACTTGGGCAATTAAGTTCAA  
AAAAGGAATTACTTTCTGGTTTGAAAAGCCTTCCTCAGCCCAAAAATGAGTACCA

GATAGTCGTCCAACCAGCTCCTGAAGAAAATGAAGAACCAGAAGAGAAGATTGA  
AGAAGACATGTCTGATAGAATTGCCAGGGAGAAGGCTGAAGAAGAAGCAAAACG  
ACAAGCTTTACTCCGGAAGAGGTCAAAAGTATTGCAAAGGGAGCTACCTAGACCT  
CCAATTGGTTCCTAGAACTAATAAGAAGTTCCTTATTGAGAGCTGATGGAGAACA  
GAGCTCCTTCGTTCTCCTACACTAATTGAGCAGGCTGATGAAATGATTAGGAAGG  
AACTTCTTTCTTTGCTAGAGCATGATAATAGCAAGTATCCTCTAGATGAAAAAGCA  
GAAAAGGAGAAGAAAAAAGGCGTCAAGCGAAAATTGGCTGCTGAACCGTTGATT  
GAGGATTTTGAAGAAGATGAATTAAGAGGCTGATGGATTGATCAAGGATGAGA  
GTCAGTTTCTTTGTGTGGCAATGGGACATGAGAGTGAATCTCTTGATGAATTTGTC  
GAAGCACACAAAACAACCTCTGAATGATATCATGTACTTTCCTAGCCGGAATGCTTA  
TGGTCTCTCGAGTGTTGCTGGAAACATGGAAAAGCTTGCTGCTTTACAGAAGGAG  
TTTGAGAATGTGAAGAAGAAAATGGATGATGACACTAAGAAAGCCACAAAGCTTG  
AGCAGAAGATCAAAGTTCTTACGAATGGATATCAGATGCGAGCTGGAAAACCTTG  
GTCACAGATCGAGGGGACTTTTAAGCAAATGGATACTGCAGGGACAGAACTGGAA  
TGCTTCCAAGCATTACAAAAACAAGAACAGTTAGCAGCATCACACAGGATCAACA  
ATCTGTGGGACGAAGTTCAGAAGCAAAAGGAGCTTGAGCGCACCTTACAGAAAA  
GATATGGTGACCTCATATCAGAGAAGGAAAAGATCCAGCATATCATGGATGAGTAC  
AGAATACAAGCTCAAATGCAGGAAGAAAATGCAGCAAAGAATCGTGCTCTTGAGC  
TGGCCAAGGCAGAAGCTGAGGCAGTTAAGAATCAACAAGCTCCTCATCCAGTTGC  
AGAGGCCCTAACGATCAGGGGGATATGTCAGTTGACCCTGCTCCAGAGGGATCT  
CTTGACGGTATGGCAGAAAAGCAGAGTTCACCTCCTGCTGCTGTTGAAGCATCTCT  
GACCGATGTAGTGCAAGTGAACTGACCGATGAAGTGCAAGTGAACTGACCGAT  
GAAGTGCAAGTGAAACCTTAGCGACTGGGTCAGAAGCTGTCGACTCTAGTGTCA  
GTTCCCAGTGTTCCAATGCAGAGGAAAATTCTGCTTCTGCCTCTCAATCTACTGTG  
ATTGAAGTTTCTCCGACTGATGAAGTGCATGAGAAGCCCGTAGATACCAGCTCAGA  
AGCCGTCAACACTATTGTTAGTTCCCAGTGCTCCAATCCAGAGGATAATTCTGCTTC  
TGCATCTCAATCAGTTGCTAGTGAACTCCCCGACCTATGACCCAATTCCATCTTA  
G

>Peaxi162Scf00137g01812.1

ATGGGAAGAACACCTTGCTGTGAAAAAATGGACTTAAGAAAGGTCCATGGACAC

AAGAAGAAGATCAAAAAGCTCATTGATTACATTCAAAAACATGGTTATGGAAATTGG  
AGAGTACTTCCAAAAAGTGCTGGACTTCAAAGGTGTGGAAAGAGTTGCAGGCTTC  
GCTGGACAAACTATTTAAGGCCAGATATCAAAAAGAGGACGATTCTCTTTTGAAGAA  
GAAGAGACAATCATTCAACTACATAGTATTTTAGGGAACAAGTGGTCCGCAATTGC  
TGCTCGCTTGCCTGGAAGGACTGATAATGAAATCAAGAACTACTGGAATACTCACA  
TTAGAAAAAAGCTCTTGAGAATGGGAATTGATCCTGTGACACACACTCCTCGTCTT  
GATCTTCTTGAATTTTCTCCATCTTAAACCCTTCACTCTATAATTCATCTCAACTGA  
AAGTTTCAAGGTTGTTAGGTGGACAACCTTTGGTAAATCCTGAAGTCCTCAGAATA  
TTAGCGAATTCTCTTTTATCATCGCAGTACACGGTGAAACCATCTGAACTTGTCTGAT  
CAGAATCTATTAATGTCACGTAATCTTCAAGGAAATCAGTTGTCTAATCCCCAAGCC  
CAAAACCAATTGCCACCATTAGTTCAAGATATTTTCATGTGGTCCATGTTCTAATGAA  
GCACAATTGATGCAACAAGCCAATCTGGAACAATTTTCATCAAATATGTCAAACATA  
TAGTTCACAAAATTGCCAACTAAATGACTGGCAAAACCAAGAAATGCCATCTCATT  
TGACAGAAGATTATAACTATCATCTACATAATTATGGTTACTATCAGCAGGATCAGTC  
CATCATGGACCCTCCACCGTCCGATGCCTCAGCTTTTCAATCCAACGACAGCAACG  
TGAGCTACCAATCTATTTTATCAACGCCTTCATCAAGTCCTACACCATTGAATTCAA  
ACTCGTCATACATCAACAGCACAACTACTGAAGATGAAAGGGAAAGCTACTGCAG  
CAACACGTTCAATTTTGATATTCAAAATATGTTGGATGCAAATGCACTCTTGTA

>Peaxi162Scf00147g00136.1

ATGGGAAGAGCACCTTGTTGTGAGAAAGTAGGTCTCAAGAGAGGCAGGTGGACT  
GCTGAAGAAGATGAAATCCTCACCAAATATATTCACGCTAATGGTGAAGGTTCTTG  
GAGGTCATTACCCAAAAATGCAGGCTTACTGAGATGTGGAAAGAGTTGCCGACTG  
AGATGGATTAATTACTTGAAGACTGATCTGAAAAGAGGAAACATAACTCCTGAAG  
AAGAAGCTATAATCATCAAGTTGCGTGCAACTCTGGGCAACAGGTGGTCTTTAATA  
GCAGAACATTTACCAGGTAGAACAGACAATGAGATTAAAACTACTGGAACCTCTC  
ACTTGAGTAGAAAAGTAGAAAGCTTAAGGATTCCAAGTGATGAAAGATTGCCAAA  
AGCAGTGGTGGAATTAGCTAAAAAAGGAACACAACAGCTAAACAAGCAAAGACG  
CGGGCGAGTAAGTCGATCAGCTATGCAGAAGAACAGAAATAACCTTTTCATCAACA  
AAGGGTACAAGTACTGCTTCAACTTTATCAAAGCCTCAGCAGCCACCAAAGGAAA  
TTAATACAATTTCTATGCCCTCTACACCAAATATAATAGAGAAAGAGGTCTTATCTA

GCACCACTACTAGCTCAGGGCAAGATGCGAGTAATACTCATTTAACAAGTGACAAC  
TATGCCAGTGAAGTAGATAATGAGATGCTGTGGCATGAAGAGCTAGATCCAGATT  
TATTTTCACTTGTTTATGGAACGAGGAAGGAGAAAATCTTGAAACAGTTGAGAATA  
ATAATAGTCATAATAGTAATACCGAAATATTAAGTGTAATGTGGACATGGTTAGTCC  
AGGGAACTCGAAAATTAATGAAACAAGTACACTAATGGAAGATGGCACTTCGCTT  
GATTGGGATTGGCAATATTTATCAGAATGGAATGAAATATGGGCAGAGCAAGAAGA  
GAACATGTCAAATAATAATATTTTCATCCAGACAGCTGTCTAATGAAGCATTGGTAGA  
AATTGATCCAGTGCAGCAGGTTGATTATAATCATAGTGAAGTAGTAGCTTGGCTTCT  
GTCTTAG

>Peaxi162Scf00160g00722.1

ATGGGAAGAGCACCTTGTTGTGACAAAAACAGTGTGAAGAAAGGGCCATGGTCA  
CCTGAAGAAGATGCAAAGTTGAAGGCATATATTGAGCAACATGGTACTTGTGGAA  
ACTGGATTGCATTGCCTCAAAAAATTGGCCTTAAAAGATGTGGAAAGAGCTGTAG  
ACTTAGATGGTTAAACTATTTGCGACCAAATATCAAGCATGGTGGATTTTCAGAAG  
AAGAAGATAACATCATTTTAAGTCTCTATATTAGTATTGGAAGCAGGACTGATAATG  
ATATCAAGAACTATTGGAACACAAAGCTAAAGAAGAAGTTATTTGGAAAGCAGCG  
CAAAAATCTTAAAGGTAACAACCAAAAAACAAGGATCAAGAAAAGGAAGAGAAAT  
GAGCAGCTCCATGTCCATGGTTTCTAATGAAAATATTATTGCAAACCCTAGTTGGCC  
TGAGCTTCCTATATTGCAACCAATACCATATTCAAATGAGGAACCACGTTTTAACGA  
CCACTCTTCGATTAGAAAGTTGTTGATGAACTTGGAGGGAAATTCTCAGATGATG  
ATAATGATGATGAAAAACCAATGAATGAACCACCAAGTAATCCTCAATATCCTATGG  
ATAATTCATTGATTCAGCCAATTTATGATCAAGATTGTATAAACATGATGCATTCTCC  
TTTCACAAATAATACTCATTACAACATGGACGCGAAAGCACTCTGCTGGGCTGATA  
CTGACACTGAGAGACGAAAGCTAGGGGAACGAATGGGATCAGATACCCCAGTAGT  
CCCAACCGTAAACGATGGATGCAATTTTATAAATGAGCTTGAGCATATGATGTACAC  
TAATCCACAAAAATTAAGTGGTCTTGAAATGTTATATGTGGATATGCTTAATAATAAG  
CATGCCACTACTTTGGGAGGAAGCTTGGACTTGGAAGATATGAACAATTTGGTGTT  
TCCACTTCCTCCTCTAGATGCTTCAAACACTGAAGGTCATCAACATGGAACCTTGC  
TACAAGGAGGTGCACTTAATGAGCTAAGACTCCAAGCCATGTCCCACCCCCCTTGT  
GTCTGGCTTCAGCAGCCTGGTAAGGGTTGGCTGTCTGAGGCCATAATGATCCGTGA

GTCTCGTGTGGAAGGGCTTTCGCTCAATGGATCAAAG

>Peaxi162Scf00164g00073.1

ATGGATCATCATCACAAAATAAGTTGGTTTAGGCAGAAGAGGAGAAGATTATCG  
TACGAGCAACGTCATGAATCAAGAAAACATTAGGGAGGAAGATATTATGGACCTTA  
GAAGGGGTCCATGGACTGTTGAAGAAGACTTCACTCTTATCAATTCATTGCTCAT  
CATGGTGAAGGTCGTTGGAATTCCTCGCTCGTTGTGCTGGGAAAAGCTGCAGATT  
AAGATGGCTTAATTATCTTCGTCCTGATGTTGACGTGGGAATATTACTCTTGAAGA  
ACAATCTTGATTCTTGAATACTATTCTCGTTGGGGCAACCGATGGTCGAAAATTG  
CTCAGCATCTACCTGGAAGAACTGATAACGAAATCAAAAATAATTGGAGAACACG  
AGTGCAAAAGCATGCCAAGCAACTGAAATGTGACGTGAACAGCAAGCAATTTAAG  
GATACCATGAAGTATCTTTGGATGCCAAGGTTAGTTGAAAGGATTCAGGCAGCCGC  
CACGACGGCTGCTACTTCCACCACCACCACCAACACCTACATCCAGAACCTAGAA  
AATCAACAATCAGTACCAAACATGAGTCATATGTCCCAATTTCTTCCTATTCAACTG  
GAGAATCACAAGAAAACAAACAGTATTAATCATTCTAGCATGACTCTCACGCTTGA  
GAATTCGAGCACAATACTTTCATCAGACAATACTCAATTGGGCGACAAGTTTCACCA  
ACATCTGACCTTACTGATTGTTACTACAATTTTCAATTAACCAAAGCAGTAATAAT  
CAAGACTATACTCCATTTAATCAAAATTATGGAGAATCCTTGATTAGCGCAACAGGT  
TATTTTCCTCAAGCAGTGGATCAGCAAAATTCTCAATGGATGGATAGTGAGTATGTT  
TCAGACAATTCATGGAACATTGAAGACATGTGGTTCTTACAGCAGCAATTGAATAA  
TAACCTATGA

>Peaxi162Scf00164g00216.1

ATGGCTGAACAAATGGGGAATAAGGGAGTTATAGAAGATGAATGGAGAAAGGGCC  
CTTGGACAGCTGAAGAAGATAGATTGCTCATTGAATATGTCAATTTGCATGGTGAA  
GGCAGATGGAATTCTGTTGCTAGGCTTGCAGGATTGAAAAGAAATGGAAAAAGTT  
GTAGGTTGCGATGGGTGAATTATTTAAGGCCTGACCTTAAGAGGGGACAAATAACT  
CCATATGAAGAGAGGATCATTCTTGAATTCATGCTATATGGGGTAACAGATGGTCA  
ACAATTGCAAGGAGCTTGCCAGGAAGAACTGATAATGAGATCAAGAACTATTGGA  
GGACACATTTCAAGAAAAAGGTCAAGAAATCAATTGACAATTCTGAAAAACAAA  
AGCAAGGCTTTTGAAAAACAACAATTTCAACAGCACCAGCAAGAACAATTGAA  
GAATCAAATATATATGAAAAAGTCATGTCATTATTAGAAGGAACTATGAAAATGA

AGTTCCTATCTTGCCTCAAAGGAAGCAAGAAATGGACTTTATGTACCAAAATACAA  
CTGAGCAAGAGCAAGGTGGTGGATTCTTTTACTCTATGCTTAATGGATATGCTACTG  
TGCCAGTGCCTGAGGTTTCATCTAACGAAGACATGATCATGTGGGATCATGGCTTAT  
GGAAGTTGGAAGATGTTAATGCCAATTTCAATACTGCAGCTTACAATAAACTCTA  
CCTTGCCTGCAACCTCTGGCTACTCCTTTCTATTGA

>Peaxi162Scf00165g00111.1

ATGAGGGAGAGGCAGCGTTGGCGATCTGAAGAGGATGCTTTGTTGCGTGCTTATGT  
GAGACAGTATGGACCAAAAGAATGGCACCTTGTATCACAGCGTATGAACACGCC  
CTCAACAGAGACGCTAAGTCTTGTTTAGAAAGGTGGAAAACTACCTCAAACCAG  
GCATTAAGAAAGGATCACTCACTGAAGACGAGCAGCGTCTTGTTATCCAACTACA  
GGCTAAACACGGGAACAAATGGAAGAAAATAGCAGCTGAAGTACCAGGTCGAAC  
TGCTAAAAGATTGGGGAAGTGGTGGGAAGTATTCAAAGAGAAGCAACAGAGGGA  
GCATAAAGAAAACAATAAAGTTGTTGATCCGGTAGACGAGGGAAAATACGACCAC  
ATTCTGGAGACCTTCGCAGAAAAGATTGTGAAAGAACGTAGTGTTCCAGGATTAC  
TTATGGCTACTTCTAATGGAGGTTACCTCCATGCTGATGCACCGGCTCCTTCACCAC  
AAGCTCTTCTTCCTCCATGGCTTTCCAATTCCACTGCCGCTTCAACTGTCAGATCAC  
CGTCTCCATCTGTGACCTTGAGTCTCTCCCCCTCAACGGTGCCCCCTACGCCTACT  
CCTGGCATTCCATGGTTACAAACCGATAGAGGACCTGAAAATGCACCCATTGTCTT  
GAGCAGTTTTCTCATCATGGAATTGCGCCTCCTTGTGGAGAAAATCCATTTGTTAC  
TGAAGTTGTGGAGTGCTGTAAAGAACTGGACGAAGGGCATCGTGCTTGGGCTGCA  
CATAAAAAGGAAGCAGCTTGGAGATTAAGGAGAGTAGAATTGCAGCTGGAATCAG  
AGAAAGCGTGCAAAGTTAGGGAGAAGATGGAGGAAATTGAAGCAAAAATGAAAG  
CTCTGAGAGAAGAGCAGAAGGCAAGTCTAGACAGGATTGAAGCAGAATACAAGG  
AACAAGTAGCAGGCCTGCGGAGGGATGCAGAAGCAAAGGAGCAGAAATTGGCGG  
AGCAATGGGCTTCCAAACACTTGCGTCTTGCTAAGTTTCTTGAGCAGATGGGTTGC  
CAATCAAGACTAGCAGAACCTAATGGTGGGCGCTAA

>Peaxi162Scf00165g00128.1

ATGGATGAATTGAAAGTAGAAGACTGCTGTACTGAGAATAAGCAATCAGCTGTTGC  
TTCGAGCTCTTCGGTTTCTGAAAATAGTGGTAGTGTTACTTTAAGGTCGCCCCGAG  
TTTCTAGCCCAACTCCTACGTCACCAACTCACAGGAGAACCACTGGTCCAATTAGA

CGAGCAAAGGGTGGTTGGACTCCTGAGGAGATAAAATCTCCCTTTCCACAGGATG  
ATACTTTGAGGAGGGCTGTTGCAGCTTACAGAGGGAAATGTTGGAAGAAAATAGC  
TGAGTTCTTCCCGGATAGATCAGAAGTGCAATGCCTGCATCGATGGCAGAAGGTTT  
TCAATCCAGAACTTGTTAAAGGACCCTGGAATCGGGAGGAGGATGAAAAGATTAT  
TGAAGTGGTCGCTAAGTATGGGCCTACGAAATGGTCTGTCATAGCTAGATCGTTGC  
CTGGTCGAATAGGAAAGCAATGTCGTGAGAGGTGGCACAATCATTTGGATCCCACT  
ATAAAAAAAGATGCTTGGACACTGGAGGAGGAACGGGCACTCATGGATGCTCATC  
GGATTCATGGTAACAAGTGGGCTGAAATTGCTAAGGTCCTGCCTGGAAGGACTGA  
TAATGCAATCAAGAATCATTGGAATAGCTCTTTGAGGAAGAAGTTAGACTTTTATTT  
AGCTACCGGTAACCTTCCGCCTGCTACTGGGGAGGGCCTTCAAATGGTTGCAGG  
AACACTGATGGAACAGCTAAAGCTGAAGAGTTTCTGCTTGGCTCAAATAAAAGAT  
CAGAAGCGGCTGTTTCATCAGGAATTACAGATACGTGTAAAATTGAAAATGGTGGG  
AAGAATCACTATAATGCGAGATTGCAGGTTGCAGAAATCAGTGCTTCAACTGGTGG  
TCCTCAAACCTGAGTCCACTGACTCGGAAGTCGCCAGGTGGGATGCTCAGTCTCCA  
GAAATAGATGCTATTCAACATATAAAACCAAGTACAGAATCAGAAAAGAGGTATGA  
TGGGCGGAGAATAAATAGTGCAGTAGATCAACTAAATGTAATTGAAGCACCATTTC  
CTTGTGAAATCCCGACATATGGTACGTTATACTATGAACCACCAAGTTTGGAAAGT  
CGTAGTCCACTGGATTCAAATCTTTTAAATATCTGCTGGGATCAATGTGAATCTGAC  
GCAAGCCCAAGCCCGTCATCAAACAGTTTCTTCACTCCGCCTAGTACAAAGGGCA  
GTAGCCTTTATGCACAACTCCTGAATCTGTACTGAAATATGCTGCTAGAAGCTTTC  
CAAATACGCCTTCCATATTAAGAAAGAGAAAGACTCAAGGTAACCTTTCCACGCTA  
ATTAATAAAATGGGGAAGACAGGTGGAGATATCTGCAAGGACAAACCTACTGACG  
CATGTGAGGTGAACAGAATTGACAGCTCCGAAAAATCTGGCATGCATAATGAAGG  
TCTTCCAAGAAATTTTCCAATGGTATTGGGCTATTCAATAGTCAACCATTTAATGC  
CTCTCCTCCCTATCGATTAAGGTCTAAACGAACATCCATCTTCAAGTCTGTGGAGA  
AGCAGCTTGAGTTTTCGTTCAACAACGAGAAGAAGCATGATACAAGTAATGGATT  
CAGTGATTCAACTGATAACGAGATATCACATGCAGTAGAGAAGGCTACACATTAC  
CAGAGAGTGCAAGTTAA

>Peaxi162Scf00166g01118.1

ATGGGTCGATCTCCATGTTGTGATAAAGTTGGTTTGAAGAAAGGACCTTGGACACC



TGAAGAAGATCAAAAACCTCTTGGCTTATATTGAAGAACATGGTCATGGTAGTTGGC  
GTGCATTACCTGCAAAAGCCGGTCTTCAAAGATGTGGGAAGAGTTGCAGGCTTAG  
ATGGACTAATTACTTGAGGCCTGATATTAAGAGAGGAAAATTCACTTTACAAGAAG  
AACAAACCATTATTCAACTCCATGCTCTCTTAGGGAATAGGTGGTCGGCTATTGCA  
ACTCACTTGCCAAAAAGAACAGACAATGAGATAAAGAATTATTGGAATACACATCT  
TAAGAAACGGCTAGTAAAAATGGGCATTGATCCAGTGACTCACAAGCCCAAGAAT  
GATGCCCTCTTGTCCCATGATGGTCAATCCAAGAATGCAGCTAACCTTAGCCACAT  
GGCTCAGTGGGAGAGTGCTCGGCTCGAAGCCGAAGCTCGACTAGTTAGACAATCC  
AACTTCGGTCCAATAGTTTCCAAAATCCTCTTGCTTCTCAAGAATTATTCACATGT  
CCTACCCCTTCTAGTCCTCTCCACAAGCCAATTGTCACACCTACAAAGGCCCTGG  
ATCCCCTCGATGTTTGGACGTACTAAAAGCTTGGAACGGTGTTTGGACCAAACCA  
ATGAATGATATTCTTCGTGCCGATGGTAGCACTAGTGCTACTGTTTCTGTCAATGCA  
CTCGGCTTGGACCTGGAATCTCCTACTTCTACACTAAGCTACTTTGAAAATGCGCA  
ACAAATTTCTAATGGGATGATTCAAGAAAACCTCTACTTCTTTATTCGAATTCGTTGG  
AAATTCCTCAGGGTCAAGTGAAGGTGGAATTATGAATGAAGAAAGTGAAGAAGAT  
TGGAAGGATTTGGAATTTCATCAACAGGACATTTGCCTGAATACAAAGATGGGAT  
AAATGAAAATTCAATGTCACTCAATTCAACACTTAAAGATTAACTATGCCAATGG  
ACACTACATGGACAGCAGAGTCACTAAGATCAAATGCAGAGGACATTTCCCATGG  
TAATAATTTTGTGGAGACATTTACCGATCTTTTGCTTAGCACTTCCGGTGACGGCGA  
CGGCGGCTTGTCTGGGAAATGGCACGGATTCCGATAACGGTGGCGGTAGCGGAAAT  
GATCCTAGTGAGACTTGTGGAGATAACAAGAATTACTGGAATAGTATTTTAACTTA  
GTGAATTCTTCACCCTCAGATTCAGCTATGTTCTAA

>Peaxi162Scf00170g01335.1

ATGGGGAGATATCCGTGTTGCAAATTAGACAATGATTTGAAGAAGGGACCATGGAC  
TGCTGAAGAAGATGAAAAACTAAAGGAGTATATTCAAGGACATGGCCATGGAAAT  
TGGAATTAGTCCCCAAAAGAGCAGGCTTAAACAGGTGTGGGAAGAGCTGTAGAT  
TAAGGTGGACAAATTATTTAAGGCCTGATATTATTAGAGGAGGTTTCTCAGATGACG  
AAGAACAAATGATCATCAACCTTCATTCTGTTCTTGGAACAAATGGTCAAGAATT  
GCAGCTCATCTTCCAGGAAGAACTGATAATGAAATCAAGAATTTATGGAATACTCA  
TCTCAAGAAAAAGCTTCTGAAGGCTGGAATTGATCCAGTAACACATCAACCAATA

AATGATCCAAGACTCCTCCTTAGTCTTTCTAACTTGATGAACCCTTTGGAATCTGTT  
CTTAGGTTACAAGCAGAAGTTACTGAAATGGCCAAAATCCATCTTATTCAAAACAT  
AATTCAAGTCCTAACTCCTCCATTAATTCCTAATTTACAAGAAAATAACTTCCCCAT  
GCAACAATTATATAATCTTGCCCTATATGAAAATATTGTTACTAATGTTACACATATAG  
ACGAACCTTCTCCAATTTCTGAATTCATCGGACATGCTCTTAAGTCCAAGTGTAAGT  
GAGAATAATATTACTGGATTTAGTAATGTGTCTAATGTTAATTCAGAACATTCACTTC  
CATCACTAGTTGAAGCTACACCTGAGAATTCACCCTCTGAGCAGAACGATATAATT  
CCCAATTATTTTGGTAGTTTCTCAGAACTAAGGACTTTGATGCATGGGAAAAAAG  
TTTGATGATGAAGCTAGCAACTCCTTCTGGCAAGATATTCTTTGA

>Peaxi162Scf00170g01336.1

ATGGGGAGGTATCCATGCTGCAAGGATGATGAAGATTTAAAGAAGGGACCATGGG  
CACCAGATGAAGATGAGAAATTGATGGATTATATTAACAAACATGGCCATACAAAC  
TGGAATTGCTTCCCAAAAAAGCAGGTTTAAACAGATGTGGAAAGAGTTGCAGAC  
TAAGGTGGAGTAATTATCTCAAGCCTGATATCAAAAGAGGAAAATTCTCCATTGAA  
GAAGAAGAAATGATCATCAACCTACATTCTCTTCTTGGAACAAGTGGTCAAGAAT  
TGCAGCTCATCTTCCTGGAAGGACAGATAATGAGATAAAGAATTTCTATAATACTCA  
TTTAAGGAAAAAACTGCTCAGATTGGGAATTGACCCAAGGACTCACAAACCAATT  
TCTGACCTCAATTACCTCATAAATCTTCTCAGAGTTTTACTTCTAACAATAATAATC  
ACCTGATGAATAATCCCTTAGCATCTGTTCTTAGGTTACAAGCAGAAGTCACAGAG  
ATGGCCAAAATTCAACAATACTTACAAGGCCTTTTTCTTCCACCCATAAATACAAAT  
ATTCCATTTTATTCATCCAATATACAAGAAAATTTTGCAAGATATTCAAGTCATTTAT  
TTCCTCCACTTGAGGGTCATGTTACAAATGTTACTAACACCCAATTCTTGGATTCAT  
GGCTAGTAGACTGTGCTAAAAGTCCAACTTGGATAATTCTACTTCTTGCATTTCAA  
ATTCATCACAATCCTATCATCAAGGTGAATTGAACTCAAAGGTAGATAATTTTGAAG  
GACTAAACAGCAGCTCAAAGACATATAATGATTATAGTAACTCACTTCCAGTACTTG  
CTCCATCTTCTCCAGAGGCTGCTCAT

>Peaxi162Scf00171g00047.1

ATGTGTAGCAGAGGACATTGGAGGCCTCATGAAGATGAGAACTCCGAGAGTTAG  
TTGCTAAATATGGACCTCATAATTGGAATGCTATTGCTGAAAACCTTACAAGGCAGAT  
CAGGGAAGAGTTGTAGGTTGAGATGGTATAATCAATTGGATCCAAGAATAAATAGA

AGTCCTTTCACCTGAAGAGGAAGAAGAAAGACTTCTTGCTTCTCACAGAATTCATG  
GCAATCGATGGGCTATAATTGCTAGGCTTTTTCCTGGCCGAAGTGAATGCAGTGA  
AAAATCATTGGCATGTTATTATGTCCAGAAGATGCAGAGAAAGATCTAAAATATATT  
CCATGAGGAATATTAATAATTCTGCCCAAATTCAACTACAAGCCCGCAAGATACTT  
CCCAAATACCAGAAGGGGAAGTCCCAACATGAACTCTATTGATCAGCAATTATTG  
GGAAGATTTAATTACTACCCTAACCTCACTTTTAATAATTCCCTTTATCCAAAGGAG  
CTTTATTTTGACCACCTTCGTCATCATTTGAAGATAAATGAAGACAAGAATCAGGA  
AGTGGAATGCTATGACTTTCTACGAGTGAATACAGGCTCAAACAAAAGTGAAGTC  
ATAGATCATATTGCAAGAAAGGGTACTGATGATGAAGAAGTGGAACAGGAGGCTG  
GTTATCATTATCCTGCACAAAGCAAAGCTCCAGTGCAATTTATAGATTTCTATCAG  
TTGGAGACTCATCGTAA

>Peaxi162Scf00177g00512.1

ATGGGTAGAAGGCCTTGTTGTTCTAAGGAAGGCTTAAACAAAGGAGCATGGACTC  
CTATGGAAGATAAGATTCTAATAGACTACATTAAAGTTCATGGTGAAGGGAAATGG  
AGAAACCTTCCTAAAAAGGCTGGTCTTAAAAGATGTGGAAAGAGTTGTAGACTAA  
GATGGCTGAATTATCTAAGGCCAGACATTAAGAGAGGAAATATAACTCGAGATGAA  
GAAGATCTCATTATCAGACTTCATAAGCTTCTTGGAACAGATGGTCTCTGATAGCT  
GGAAGGCTACCAGGACGAACAGACAATGAAATCAAGAACTATTGGAATACAAACA  
TTGGCAAAAAATTACAACACCAAAGAGCTGCAGCTAATTCTGGACATGCCAAGTC  
CAGACCACCAGTTACTACCCAAGACATTGTAGGATCAGGATCTTCATTATCTTCCTC  
GGCCTCCCCATGTTTAGTTGTTTCGGACAAAGGCAATGAGGTGCACTAAAGTTTTCA  
TTCCTACGCCCAAAAATACTAGTCATGACAACTCAATTACTACTAATTGTAATAATG  
ATGATGATGACAAGGTAATGGCAGTAGAACTACTGCTTTAGTAGCATCCTCATCCT  
CATCATTTACCCTATCTTCAATATTATCCGAGCAACAACCAATATCAGGATCATCACC  
AGTGTCTTTGTCTGGAGATCAATTCATGGAAAATAGCTTTAACTTCATGTTTAATTT  
TGACATGGACGATCCCTTTCTATCTGAGCTTCTTAATGCAGCTGAAAATACAACACTAC  
TATTGGTGGTGACCAAGTTGGAGATAGTTTCAACAGAAATGAAAAGGAAAGAAGT  
TATTTTCCTCCAAGTTCTAGTCAAAGTGCATTGTTCTCAGAAGAGACGCAACACAA  
CGATTTGGAACCTTTGGATTAATGGGTTCTCTTCTTGA

>Peaxi162Scf00191g01323.1

ATGGGGAGAACACCGTGTTGTGATAAGAAAGGTTTAAAGAAAGGACCATGGACAC  
CTGAGGAAGATGAAAACTCGTTGAATATATCAAGAAGCATGGTCATACTAGCTGG  
CGTTCTCTTCCTAACCTTGCAGGTCTTGATCGTTGCGGGAAGAGTTGCCGTCTTCG  
GTGGACAAATTATCTAAGACCAGACATCAAACGAGGTCCATTTAGCCAAGAGGAA  
GAGAAGCTTGTCATACAGTTACATGGAATTCTTGGCAACAGGTGGGCAGCAATCG  
CATCACAACCTGCCTGGAAGAACAGACAATGAGATAAAGAACTTATGGAATACTCA  
CCTGAAGAAACGCCTCCTTTCCATGGGAATTGATCCTCAGACTCATCAACCCTCTA  
CAGCACCCAATGGACTACTAAGAAGACCACCTACATCGTCTTCAGCCCGTCACATG  
GCACAATGGGAAAAAGCAAGGCTCGAAGCTGAGGCTCGTCTTTCCAGGGAACCA  
CAACTCTTGGTTCCATCATTAGTAGGAAAGTCTGAAACTGACTACTTTTTGCGCATA  
TGGAATTCAGGGATAGGAGAAGCATTTAGGAAATTGAAGAAAGAGGAAAAGACT  
ACTTGTCAAAGTCCAGCCTCTCAAGAATCATCATCCACAAAATATGGATCTGATTC  
GGGCATCACAACCTGAGATAGACCTTGGTTTAGCTGGTTCTCCAGCTGCAGGAAGC  
AATCAAAATGAAGATACAAAGTGGAAGAATGCTCAACCATATACTGAAAATTTCTT  
GCAAGGATCTGATACCTCTAGCTCCAGTGGATTGGAAGATTCTTCTGAATCGGCAC  
TGCAACTTCTTTTGGATTTCCCGAGTCCAGCTGCAGAAAGGCTTTGTATTTGACT  
CCTCTAGAAGTG

>Peaxi162Scf00194g00218.1

ATGGGGAGGCATTCTTGTTGTTACAAACAGAAGTTAAGGAAGGGCCTTTGGTCTC  
CTGAGGAAGATGAGAACTTGTAAGCATATTACTAAATATGGTCACGGTTGCTGG  
AGTTCAGTCCCTAACTAGCAGGTCTTCAAAGGTGTGGAAAAAGCTGCAGGCTGA  
GGTGGATTAACCTACTTGAGGCCAGATTTGAAAAGAGGGACATTCTCACAGGAAGA  
AGAGAATTTGATCGTTGAACTTCATGCAGTTCTTGGCAACAAATGGTCTCAAATTG  
CAGCTAGATTACCTGGACGAACAGATAACGAAATTAAGAACTTATGGAACCTTCC  
ATTAAGAAAAAGCTAAGACAAAAAGGGATTGATCCAAATACTCACAAGCCACTTT  
CTGAAGTTGAGAATGAAGAGAAAGCGTCGGCAAACAGTAACAAGAACAATGAGA  
AAGTAATTTCTGAAGACTCAAATGATCAGCTCAATTTTATTGAAGCTCATGAGAGT  
ATTTCAAAACATATTGGAATTGCAACAGAAAAGTCAAGCACGCTATCTACAATGAC  
AAATAATATGGACCGTTATCCACTTATTCATGAGACCAATAATATTGTCCCACCAACT  
CATGAATTCTTCACCAAGTCTCCTCATGATTTGGCTAGTTATTTCTCCTTTTCAGCAAT

TGAATAATTATAGTCCCAATAGTATTGGCTTATCCATGACTAATTCCAATACCAATAA  
TCTTATCTTCAATAATTCTACCAATTCCAAGAATTCACATGACATGGTATCAGATCAA  
TTCAATTCTTGTACCATGGCAACTGATCCTGAAGAAATCAAATGGTCAGAATATATG  
CAAACCCCATATTTACTAAGTGCTAATCATCATCAAATGTCTCAGCATCAAGACTTA  
TACGGCGATGCAAAATCGGAGGCACAATTCATAACACAAGGTTTCATTGAATTTGAG  
TAATACCACATGGCTTCATCAGAGCCAACAGCAACAATCTTCTCTACAACTGCAG  
ACTTATACAATAAGAATTTTCAGAGGCTACCCGCCGCCTACGGACAATATTCT

>Peaxi162Scf00203g01315.1

ATGAAGACTTGTGCAGTTAGGGACAGTGATGAGAAGGACAAAGGTATGGGCCATC  
ACTGCTGCAGCAAACAGAAAGTTAAGAGGGGTCTTTGGTCACCAGAAGAAGATG  
AGAAACTCGTTAGACACATCACTACCCATGGCCATGGCTGCTGGAGTTCTGTTCT  
AACTAGCAGGACTACAAAGGTGCGGAAAGAGTTGTAGGTTGAGATGGATAAATT  
ACTTGAGGCCAGATCTAAGAAGGGGTTCATTCCTGAACAAGAAGAAAGAACCAT  
AATTGATGTTTCATAGAATATTGGGAAACAGATGGGCACAAATAGCCAAACATTTAC  
CTGGTAGGACTGATAATGAAGTGAAGAATTTCTGGAACCTCTTGCAATTAAGAAGAA  
ACTTATTGCTCAAGGGTTAGATCCAAATACTCACAATCTCCTTTCACTCATCAAAA  
CAAGAACAACAAAACAAACAATTCATCCAAAACCAAAAGTTATCATCAAGATTCC  
ACCTCAGTTTTTCACCATTGATACTTCAACAAATAAAGAAGTCATTTCAATGGATATA  
AAAGCAACTCTTGCAGCCTTGCCTCCTTTTCTTCACAGTAATAATAACTTCTAGT  
ACGTACCATTACACAACCTCCTATTGTTCCCATCATTGAATACCAAAACCCTTCAACC  
TTCACATTAAGTGAGAGGAATAATAATGGAAGTACTACTACACAACATTCCGTGTT  
GGATTTTGCGAGCAACACTTCAATTAATAGCACTACGAATAATGTGTCATCTTCAAC  
GTTAACTCCATTAGAATTTGGTTATATAAATGAGAATTGCATGTGGGCTGGAAGTGG  
CCTAGAACCAACAACCTTTAAATCCTGCCACGGGCGGAACAGAAGAAATGCAAGTA  
CAATTACAAGGGGAGCAGTTTCCAATTCAGACAAAGTTTTGTGATCAAGAGGATG  
TTTACAAGGTTAATCAAACGGTGGAGAATACGTTTGATAACTCTAACTTTGATTTTG  
ATTTTGTGGATTCTGCATTGGTGCCTTGTGGATTGTACAATAGTGTTAATTCTATGGA  
TCAACTTTCATGGGATTGTTAG

>Peaxi162Scf00222g00521.1

ATGACATCATATTCTTGTTCTCCTATGGGCACTACTACTACTACTACTTCAATGGGAA

TGTTTTATGCAGATATGAATTCACCTTTCCATTACTTCTATAAACTATGTAACAAGTGA  
TGGTGGAGTAGGAGAAAATAGTAATGAACTATTGATCTTAATGCTTCTTGTTGCTT  
TAATGAAGAGAAACAAATTACCATGCATAGTAATTTTAGTAGTGGTAATAATGGCAA  
AGAAATAGAGAGTGGACAATCAAAGCTTTGTGCTAGAGGTCATTGGAGACCTGCT  
GAAGATGCTAAGCTTAAGGAACTTGTTGCTATTTATGGTCCTCAAATTGGAACCT  
TATTGCTGATAAATTGAGATGGTTTAACCAGTTGGATCCAAGAATAAACAGAAGAG  
CATTTACAGAAGAGGAAGAGGAAAGACTAATGGCAGCACATAGATTGTATGGTAAT  
AAATGGGCTATGATAGCAAGGCTATTTCCAGGGAGAACAGATAATGCAGTGAAAA  
ACCATTGGCATGTGATAATGGCAAGGAAATATAGAGAACAATCAAGTGCTTACAGG  
AGGAGAAAAATGGGACAATTTGTTTACAGAAGAACAACAACATCATTAGTGGAAG  
AAGAAGATTCAAGTTTTGTCAGTAGTAATAGTAGTAGTGGCAAAGAAGTTGTAGCA  
GCAACCATGAAAGGAGAAAAATCCAACACCAATCATCAGTGGCCAACTGCTGCTA  
ACCCCTTTGCAAGTCTGAAAATTAATAATGATGGTCCTAGTGGTTGGGTAGTTTATG  
GACCAAATGGTTCATCCACATGGCTGCTTCTGCTGGAGAAGCAGCACCTCCTAGC  
ACCAATGTCATTGTGGGAATGAAATGA

>Peaxi162Scf00222g00715.1

ATGGGAAAGTCCAAGTGTTGTGATAAAGAGGGGTTGAAAAAAGGACCATGGACA  
CCTGAAGAAGACCAAAAACCTCTTGCTTAGATGGATAAATTATCTACGGCCTGATAT  
CAAGAGAGGAAAGTTTAGTTTACAGGAAGAAAGAACCATCATTGAGCTTCATGCT  
CTTCTTGGAACAGATGGTCAGCAATGGCAGCATACTTGCCTAGCAGAACAGACA  
ACGAGATAAAGAACTACTGGAACCTCACGTTTGAAGAAAAGATTAACAAAAATGGG  
CATTGATCCAATGACTCATAAGCCAAAGACAGACAATGGCAACTCAAGTCAATCA  
AAATATGTTGCAAACCTTAGTCACATGGCTCAATGGGAAAGTGCAAGACTAGAAG  
CAGAAGCTAGACTTGTTCTGATGATCAAAAGACTCAAAAATGCTCTTCAATAACACT  
CACAATTACAACCAAATTACTTCACAACCTTACTATCAACTTCCTTGTCTTGACATA  
TTAAAAGCGTGGCAAAGGTCTAGCACAAAACCAACAACAATGACATTAATGCTA  
TTCTTCTTGATGGTAATTTTGCTACTAGGAACAAGAGCCTCGAATCATCAATACCAT  
CAACGTCAAATAATTTCTCGGGGAATGTGGTCATGAACAACGTCATAACAACAACCT  
ACTACTACTACTACAACAGTTGGTGACAATCTTCCTTTGTCTTCAATCAATTGTATG  
GATGAAGACCTTTGTCCAAGTAATTTTCATGCAAGAGTTCTCAGAGCTATTTCCAGA

ATATAATACATGTGCCCAAAATCCAGAAAATTATTCTACTGGACAATTGGATAATTTT  
ATGGGAGGCTGCTTTTTGGATTTTGAAGATAACAAGTACTTTAACTGGAACAATTT  
CTCTCATTGGTCACTTCACCAGTTGGTTCTCCAGTATTTTAA

>Peaxil62Scf00222g00821.1

ATGGGAAAGTCCAAGTGTTGTGATAAAGAGGGGTTGAAGAAAGGACCATGGACA  
CCTGAAGAAGACCAAAAACCTCTTGTCTTGTATTGAGGAACATGGTTGTGGTAGCT  
GGCGTGCTTTGCCTGCTAAAGCTGGAAAGTTTAGTTTACAGGAAGAAAGAACCAT  
CATTCAGCTTCATGCTCTTCTTGGAAACAGATGGTCAGCAATAGCAGCATACTTGC  
CTAGTAGAACAGACAACGAGATAAAGAACTACTGGAACCTCACGTTTAAAGAAAAG  
ATTAACAAAAATGGGCATTGATCCAATGACTCATAAGCCAAAGACAGACAATGGC  
AACTCAAGTCAATCAAAATATGTTGCAAACCTTAGTCACATGGCTCAATGGGAAAG  
TGCAAGACTAGAAGCAGAAGCTAGACTTGTTCTGATAGATCAAAAGACTCAAAAATG  
CTCTTCAATAACACTCACAATTACAACCAAATTACTTCACAACCTTACTATCAACTT  
CCTTGTCTTGACATATTAAAAGCATGGCAAAGGTCTAGCACAAAACCAACAACAA  
ATGACATTAATGCTATTCTTCTTGATGGTAATTTTGCTACTAGGAACAAGAACCTCG  
AATCATCAATACCATCAACGTCAAATAATTTCTCGGGGAATGTGGTCATGAACAAC  
GTCATAACAACAACCTACTACTACAACAGTTGGTGACAATCTTCCTTTGTCTTCAATC  
AATTGTATGGATGAGGACCTTTGTCCAAGTAATTCATGCAAGAGTTCTCAGAGCT  
ATTTCCGGAATATAATACTGGACAATTGGATAATTTTATGGGAGGCTGCTCTTTGGA  
TTTTGAAGATAACAAGTACTTTAGCTGGAACAATTTCTCTCATTGGTCACTTCACC  
AGTTGGTTCTCCA

>Peaxil62Scf00228g00914.1

ATGGATCATCATCATCATGTAAAGTTGGTTTCGAGCCATGGTGGTGGAGCTAATTGT  
AATAAGAATAATCAACAACAACATGATGAAGATATGGACCTCCGACGAGGTCCATG  
GACTGTTGAAGAAGATTTTCGCTCTCATGAATTACATAGCTCATCATGGTGAAGGTC  
GTTGGAATTCTCTCGCCCGTTGTGCAGGTTTGAAACGAACTGGGAAAAGTTGCAG  
ATTGAGATGGCTGAATTATCTTCGTCCTGATGTTTCGACGTGGAAACATCACTCTTGA  
GGAACAACCTTTTGATTCTTGAACCTACATTCTCGTTGGGGCAATCGGTGGTCAAAAA  
TTGCACAACATTTGCCAGGAAGAACTGATAATGAGATCAAGAATTACTGGAGAAC  
ACGAGTGCAAAAGCATGCCAAACAATTGAAATGTGACGTGAACAGCAAGCAATTT

AAGGATACAATGCGTTATCTATGGATGCCAAGGCTAGTTGAGAGAATTCAAGCAGC  
TGCTGCTAATAATACCACAACTCCAATAACCCCAGCAAAAGCCAAATGGTTCATC  
AGACAATTAATTCAAACATGAGTGGTATGTCTGAATTTGTGCCTATTCATGACAACG  
TTGTTAGTACTAATAAGCCAAGATTAATGAGTACAGAGAATTCAAGTACGGCAGCA  
GCTTCATCAGAAAATTCATTTGGGACACAAGTTTCACCAGTTAACTCTGATCTCAC  
TGATTGTTGCTACAATTACCCACCAGTTAATCAAGATTATTTTCAAGTTAGTCATCAT  
CAGAGTACTACTAATAATGATCAATTGTGTCATGGAGAATCTTTAACTAGCCCCACG  
GGTTACTTTTACCATGGTACTGGATTAGATCAATTCAGGGAATGGATCAGCAGCA  
AAACATGAACAGTAGTCAATGGATGGACGGTGGGAATAATTTTCCGATAGTTTGT  
GGAACATTGACGACATGTGGTTCTTACAGCAGCAATTGAACAACAATAACAA  
TATCGTCTGA

>Peaxi162Scf00268g00046.1

ATGGGACGTTACCTTGTTGTGAAAAAGCTCATACGAATAAAGGAGCATGGACTA  
AAGAAGAAGACCAACGCCTCATCAACTACATCCGTGCTCATGGTGAAGGATTGCT  
AAGATGTGGAAAGAGCTGCAGATTGAGATGGATAAATTACCTAAGGCCTGATCTCA  
AAAGAGGGAACTTTACTGAAGAAGAAGATGACTTGATTATCAAACCTCCATAGTTTA  
CTTGGAACAAATGGTCTGTTATAGCTGGAAGATTACCGGGAAGAACTGACAATG  
AAATCAAGAATTATTGGAATACACACATTAAGAGAAAACATCAGCCATGGCATT  
GATCCTCAAACATCATCGTCCCCTCAACGCCGCTGCAAACCCCGCCGCTACCACCAC  
TATAACCACCAACACAACCAAAAACATCTGCATGGACTTCAGAAACAACGTTGAC  
CAAAAACCCCATATTAATATTATCAACAAGACTAATGCCACAGATTCATCAAACAAT  
GAAACAAAATGCAGTAGTGTTACAACCTGAGGAAACACAACCGTTAGAGCTACCGA  
AGAAAAATACACAAGTGATGATAAATCTTGAACCTTCAATTGGGTTGCCATTTTCAT  
GCCAAGACTGATCATATTTATTCATCCAATTCAGCTGAGTCAACGGCCCCGTACAA  
CTTCTTGGCAGCAGCAGCAGCACC GCCGCAACGGTGGCTGCTGTACCGGTGGTG  
GCCATGGCGGAGTTGGTGGCTGAAACAGCTTGTTTATGTTGGCAAATTGGCTTTCA  
AGGTGGTCAGTCTTGTGGTAAATGTAAAACCACAACCTGGATTTTACAGATTTTGCT  
GA

>Peaxi162Scf00269g00088.1

ATGGGAAGATCACCATGTTGTGATAAAAATGGACTGAAGAAAGGTCCATGGACTC



CAGAGGAAGATCACAACTCATTAGTATATTCAAGTTCATGGCCCTGGGAACTGG  
CGTAACCTTCCGAAAAATGCTGGACTTCAAAGGTGTGGAAAGAGTTGTCGTCTTA  
GGTGGACGAATTATTTGAGACCTGATATTAGGAGAGGAAGATTCTCGTTTGAAGAA  
GAAGAACTATTATCCAACCTCATAGTGTCTTGGCAACAAAACAGATAATGAAAT  
CAAGAATTATTGGAATACACATATAAGGAAAAGGCTATTGAGGATGGGAATTGATC  
CAGTGACTCATAGCCCTCGTCTTGATTTCTTAGACTTATCATCTCTTCTGAACTCAA  
CTCAACTTAATCTTTCCAGCTTACTTGGACTACAAGCACTCGTAAACCCTGAAATT  
CTGAAACTTGCAAATACTCTTTTTCTACCACACTCTGAAAATCAAGAACTCTTGTT  
ACTTAAGCTTCAAGAAAACCAATTATTGAACCCTCAGCATATTCAAACTCTGAAG  
GGCCTGAAATGTTACTCCAAAACTTCTACAAAGTCAATTAGTGAATTCCCCATTG  
CATAACCAGTCCTCTATTTTCCAACATAATACTAATCAGATTCACAACCAAATTCCT  
GAAATACCAAATTGCACCCAACAAAATGTTTCGTGTTTCATCTTCCCAGTCCATGCA  
AGGTAACATGGGACGTTATTTGATGAATGGACAAATATTCCAAGAAAATATGATGCT  
ACCTCCACAAAACCTATAGTCATACTTCTACGCCTGATGCATCTGAGAACTCAACATT  
TCAGTCCTTAAACAATAGCAGCAATCAGAATAGTCAGAATTTAGCTTTGATACAC  
CTTTGTCAGGCACAGAAGAAGAGAAAGAGAGTTATTGCAGTAATTTTCATGAAATTT  
GAAATTCCGGAGAGTTTAGATTTTGATGATTTGCTGTAA

>Peaxi162Scf00273g00087.1

TTCAAGTTTCACCCGAAGGACCCTAAAAAAGCAAACGTCATTGTTTGTGCTCTTGG  
AAACATCTGTCGCCACTGGCAGTCTCTCCTGTTGGTCTCGTTGCTACTACTCTTGG  
CAATTGAACTCTGTACTCTCTCAGTCTCTCTTGCTTTCCTTGATGCAGTTTCCACTC  
TGAAGGGTCCTGAAGAAAGAAACATTCTTCTTCAATGTGGTAAAAGTTGCTGTCTT  
CGTTGGACGAATTATCTGAGGCCAGACATCAAACGAGGTCCGTTTAGCGAGGAGG  
AAGAAAAGCTTATTATACAGTTACATGGCATTCTTGGCAACAGATGGGCTGCAGTA  
GCATCACAACCTCCTGGAAGGACGGACAATGAGATTAAGAATTTATGGAATACTCA  
CCTGAAGAAGCGCCTGTTTTCGATGGGCATTGATCCTCACACTCATGAACCATCAT  
CTGTGCCTAGTGGGCTGGTGAGGAGACCACCTACATCATCTTCAACACGTCACATG  
GCGCAATGGGGAAGTGCTAGGCTCCAAGCTGAAGCTCGTCTAAAGATTCACATTTT  
TCGATTCCCTCTC

>Peaxi162Scf00274g00625.1

ATGGGAAGACCACCTTGTTGTGATAAAATTGGGGTGAAGAAAGGACCATGGACAC  
CAGAAGAGGATATCATCTTGTTTTATACATTCAACAACATGGTCCTGGTAACTGG  
AGAGCTGTTCCCACTAACACTGGTTTTGCTTAGATGCAGCAAGAGCTGTAGGCTTAG  
ATGGACTAATTATCTCAGGCCTGGTATCAAACGTGGCAACTTCACAGAACATGAAG  
AGAAAATGATTATTCACCTCCAAGCTCTTCTTGGCAACAGATGGGCAGCGATAGCA  
TCATATCTGCCACAAAGAACGGACAATGATATAAAAAATTACTGGAATACTCATCTA  
AGAAAGAAGCTGAAGAACTTCAAGGGAATGATGATGAGAATAGCAGTAGTACTA  
GTCAAGAAGGAATAAGTTCATCAAATATCTCAAAGGAAAGTGGGAGAGGAGGCT  
ACAAACAGATATTCACATGGCTAAAAAAGCTCTTTGTGAGGCTTTGTCCCTTGACA  
AACCTATTGCGAATCCTACCCAACTCCTGTCCAAGAATCTGTTCAACCATGTACTA  
CTTATGCATCAAGTGCAGAAAATATTTCTAGGTTGCTTCAAATTTGGATGAAAAATT  
CTCCAAAATCATCTCAATTAAGTCAATCAAATTCGGAGAGTACTACTACTCAAAGC  
AGCTCCTACAACAATTTTTCAATGGGACAAGTTGGTTCAGCTCTAGTCCTAGTGA  
AGGGACCATAAGTGTTGCTACACCTGAGGGTTTTGACTCTCTCTTTAGCTTCAATT  
CATCGTCCGTGGACGAGGGTAATGCTGCGATTTTCCAAGTTGATAGCAAACCAAAT  
TTGCCAAATCTCAATGCTGCAAATGGTTTTTTCTAGAGGAGAGCAAACCAACTTT  
GGAGTCACAAGTACCATTAACCTTTGTTGGAGAAGTGGCTCTTTGATGATGCTATTA  
ATGCACCAGCACAAGAAGAATAATGGGAATTGGAATGGGAATGGCCTTAGGTGA  
AGCTGCTGACTTGTTTTGA

>Peaxi162Scf00276g00412.1

ATGGAAAGGAGAACCAGTGGTCCTAAGAGACGTTCCAGACAGTGGGAATGCTGAG  
GAGATTTTACTTGCAGCGGAATGTTTCAATGACCGGACAGATGTACAATGCTTGCA  
TAGGTGGCAGAAAGTTCTCGATCCCGAACTTGTCAAAGGTTTCATGGACTAAAGAG  
GAGGATGAAATACTGATTGAATTAGTGAACACATATGGTGCCAAAAAATGGTCCAC  
TGTTGCACAACATTTAGCAGGACGCATTGGAAAGCAATGTCGGGAAAGGTGGCAC  
AATCATCTTAATCCAGCAATAAACAAAGAAGCTTGGACACAAGAAGAGGAATTGG  
CTCTTATCCGTGCCCACCAAATTTATGGAAACAAGTGGGCAGAGTTATCAAAAGTT  
TTGCTTGAAGGACAGACAATGCAATAAAAAATCACTGGAATAGCTCTGTAAAAA  
AGAAACTGGACTCGTATTGGGCATCAGGTTTACTTGACAGTTCCCTTCTCTGTCT  
AATATCAACCATCAGAGCCAATCAATCCCTTCTTCTTCTATGAAGTTGCTACACAAC

AGTGACGATGAAAGTGTCCACCAAGACGGAATAGTAAAGGAGGAAGTTTCAGAAT  
GCAGTCAAGGTTTCGCCTTTGGCTGGCTGTTCCCACTGTACAAGTGAAGTGGGGCAA  
CACATTTGTACATATAAGAGAGAATGATAGGATGTCGGAGGAATCACTTAATAAAA  
ACAATGCAAGCTCCAGCGCAGCGCCATGTTCTAGAACTATACACCAGATTTTCAT  
GATGTTTCTTGTTCACTGCCAGAAGTTCCCACTGAGGATTCCAAGTTCCT  
TGAGCATAATTACTCACATGACCTGGGAAATTCCATTGGGAAAGATTGGCAATTTA  
ATAGGGAAGACATACCTAATATATCTCTGGAGGTTATTCAGGAATCCTCAGGGCTTT  
TCACGCACCTTCTAAATTGCAATGAAAACCATAATATGGTACCCTTTCCATTGCAAA  
CTCTAACGGGATTTGGAAGTCTAATGCTGGAAATGTGGTTGAGGGTCCATATAGG  
CCCAATGAAATGTTTTCTAGTGTGGATGGTTGCAGGATCATACACCCTGAGGAAGG  
AATTTCTCAATGCTCTCCGTATGAACTGGGGTTAATGGAAATGGTGCACCTGAAG  
ATTCTTTAATTTACCAATCATCAAACGATCTGATCCTTGAAACAAGAGATATGGCTC  
CACAAAAGTCAATGCTTCAAGTTTACATGATTTTGAAGCTTCACGCCATCAGGCA  
TTTTCTGTTCACTCACAATTTTCTTCAGAGAATAGATCGATCGTGTGGTATTGCTT  
CAAATCATCCCCTTATTTCTCCGCTTGAAAACCCAATTCAAGAGTCATTCACCAGT  
GGATGTGATGGTTTTATATATCCAAGTGAGTCAGCCGCTCCTGCCGACAATGGCAC  
AGACAATTCATTCCTGGCAGATCGACTTGATCACACAAATGATTCCTGTAGGCTAG  
TTTCTGTGAATGATCTTGGCTCAACTACATCAAATACTGTTCAAAAAGGTATGCTTA  
ATGAAAACACATTTGTACCGGAAGAACAGAAAGATGGAGGAGCTTTATGCTACGA  
GCCTCCTCGATTTCCAAGCTTGGATGTTCTTTTTTGAGTTGTGATCTTATACAATCT  
GGTTCAGATACACAGCAAGAGTACAGCCCTCTTGGCATCCGCCAATTGATGATGGC  
TTCCGCGAACTGCCTTACTCCATTAAGATTGTGGGACTCACCATCAAGAGATGACA  
GTCCAGATGCTATCTTGAAAAGTGCTGCCAAAACCTTCACATGGACACCTTCTATAT  
TAAAGAAGCGACACCGTCATTTAGTGACACCTTTGTCAGAAAAGAGATGTGAAAA  
AAGGCTAGAAAAGGATTTCAATCAGGAATCATTTTCTATTATGACTGCGGAATTTTC  
CCGACCACAGGATATGTTTGATCAGTCAGCAAATGAAAAAGCCTCTACTGAAGAC  
AAAGAAAATGGGCATCCATCCTCAGAAGCTGGACGAAAGGAGGAGGGTGATGGA  
GTAAGTGGACTTTTCATGTTGTGGAACTCAGAGAGACGGTTAGATGGTGGTGCTC  
ACTACCGTAAAGAGCCCCATGGTAAAAGTGCTGGAGCCAATGATGGAATAGGAAA  
CGTAAAACAGCCTCCTGGAGTTCTGGTCGAGCTTAGCTCAAATGACCTTTTCTTCT

CTCCTGATCGTGTCTTAGTCAAGTGTGATAGAGCTACAAGCCTAAGTAATAAAGCT  
CTGGCTAACC ACTATGCCCCGACGACTTGAAGCTGCATCAAAACAAGTGACGGTTT  
CATCATCTTTTGAGACTTCATGCTCGTCTGTTGGTTGCTCTCCTGCCGTTTCATGGAA  
AATGCAGAAGCAGTTTTGT CATAGCTACATCAACTGCATTGGAGAATACAGCTGAA  
AATTCTGAAAACGGATTTCGTGCTGAGACTGAAAGCATATTTGGAGAGACGCCTTT  
TAAAAGAAGCATTGAATCTCCTTCAGCATGGAATTCTCCATGGTTCATGAATCTTT  
TCTGCGGAGCCCAAGATGTGAAGTAGAACTTGCCTTTGAGGATATTGCGCTTTTTA  
TGAGCCCAGGTGACAGAAGTTATGATGCTATTGGGTTAATGAAGCAATTAAGTGAG  
CAA ACTGCAGCTTCAATTGCAGATGCCCATCAGATTTTGGGAAATGATACTCCAGA  
AACAATCCTGTTGCAAACGAATTCCAAAAAACAGAAAGCAGATGAAAATTGCTCC  
CTTCTGACTTCAAATGCTGTGAGCGAGAGACGCACACTTGATTTCAGTGAATGTGG  
TGGAACACCACCGGCAAAGGGAAAAGGAACTACCAAATTTGACAGTGGCACCAG  
CTTTTCAAGTCCATCCTCATACCTGT TAAAATGTTGTAGGTAG

>Peaxi162Scf00284g00077.1

ATGGAGGGTACTACTGGAGACAAGATCAAAGGTTTCATGGAGTCCTGAAGAGGACA  
ACATGTTGATCAAGTTAGTGGACCAACATGGTCCAAGGAATTGGTCCCTTATTAGT  
ACTGGCATTCTTGGTAGATCCGGTAAGTCGTGCCGGTTGCGGTGGTGCAATCAGCT  
CAGCCCCACCGTGCAACACCGACCTTTTACACCTTCTGAGGATGCTATTATCCTTC  
AGGCACATGCTCTTCATGGCAATAGGTGGGCTACTATAGCCCGCTTATTGCCTGGA  
AGA ACTGATAATGCTATCAAGAATCATTGGA ACTCCACGCTCCGCCGTAAACGCCA  
CGGGCCCGCGCTTTCAAGGAGTGGTTCATCGTCTGATCAGTCCA ACTCGAAGAGG  
CATTGTACTCGTGCATCACAGGAGCAGAGCAGTTGTGGGCTGGATTGTGATGATTT  
GGGCCTTGATGGGCCTAATGGGCTTGATGGTGATGAATTGGGCCTTTATGGGCCTG  
AGACTTCACTAACGTTGTCGCTACCAGGGGGCGGGTCGATAGATTCACCTATGAAG  
GAAGATGTTCTGTGAAGGAATCCGAGCCGCTGATGAACAGTGATAATAAGGTGA  
AGGAGGAGAAACGTACGGTGGAGATTGAAGAGACATGTTTGGTGACAATCATGCA  
GCGTATGATAGCACATGAGGTTCTGTTGTTACATTGACAAATTACGGGCTCAGGGTG  
GGCTTGGAATAGGGCCTGGCGTTGAGTTTGAGGTTCCAAAGAATCCTTAG

>Peaxi162Scf00295g01125.1

ATGGGAAGGTCTCCATGCTGTGATGAGAGTGGTCTCAAGAAAGGTCCCTGGACTC

CTGAAGAAGATCAAAAACCTCACCAACTATATCAACAAACATGGCCATGGCAGCTG  
GAGAGCCCTCCCTAAACTTGCAGGTCGAACTGATAATGAAATCAAGAATTTTTGGA  
AACTCATTTGAAGAAGAAGCTAATTCAGATGGGATATGATCCAATGACTCATCGA  
CCTCGAACCGATATCTTTGATAGTTTGCAACAATAAGCTTTGGCAAAGTTGAA  
GGAGTTAATGGAACATCACTCATGGGAAGAACAAGCTATGAGATTACAATCAGAA  
GTGGCTAAACTTAACTACTTGCAAAATTTTCTACAACCTCACAACACGAGTTTCAA  
TGCTATACAAGATATAGAAGCTTACAATCTTTTAAATTCATCTTCAATTTAAAGAT  
AGCCTAGTCTTAGGCACTAATAACCATCTGCAAATTCCCACAATTTCTACTTCTTCA  
AGTCTTCAAGCTATTCAAGATTCAATCCCTTTTTTCCCATTGCTGAATTACAAACC  
CCTCGTAGTAATTTCAAACTTCTCTAAACAAAGATAGTGTTGACCTCAAAACAC  
TGAATTTAATGTTATGAGCCATGGAGAAACGTCACCTACTTCTCCATGGCTTACTTC  
ATCTTTATCTCCATCTCCTCCTCCTCCGGTAATAAATGATGAAACAAAAAACGAGA  
ATTCATTAGAAGTGATGATCTCGTCTTGCTTGCCTGAAGAGAGGAAGCTCTCAGAC  
CATCTTTTTCAGCCAAATAACGAGCGATCACTCAGTAATGAAGGAGCTCCACCTTC  
TGTCTGGCCTGACCTTCTTCTCGAGGACTCTTTTTTCCAGGATATTGTAAAGTTTAA  
A

>Peaxi162Scf00304g00074.1

ATGAAGGTTCTGATAAAGGGAGGAGTATGGAAGAATACAGAGGACGAAGTCTTAA  
AGGCCTTGGTGATGAAGTATGGTAAGAACCACTGGGCTCGTATTTTCATCCTTGCTC  
GTTCATAAGACCGCCAAGCAATGTAAGGCTCGTTGGTATGAATGGCTCGATCCTTC  
GATTA AAAAGATTGAATGGACACGAAAAGAAGATGAGAACTACTTCATCTTGCA  
AATCTCATGCCCTCACAATGGAGAACCATTGCACCAGTTGTTGGTCATACACCATC  
CCAGTGTCTTGTACGTTATGAGAAGCTTCTTGATGACAATGAGA ACTATGACCTTA  
GTGATGATGATCCAAGAAAATTGCGTCCTGGAGAGATTGATCCGAATCCAGAATCA  
AGGCCTGCTTGTCTGATCCTGATGATATGGAGGAAGATGAGAAAGAAATGCTTTT  
TGAAGCATGGGCTCGGTTAGCCAACGCAAGAGGCAAGAAGGCTAAGAGGAAATC  
TAGAGAAAAGCAGCAGCTTGAAGAGGCTCGTAGGCTTGCTTCTTTACAGGAGAGA  
AGAGAACTGAGGGCTGCCGGATTAATAGATGTCCATCAAAGGAAGAGAAAAAGG  
AGTGGAATTGATTACAATGCTGAAATCCCCTTTGAAAAGAAGCCTCCTCCAGGTTT  
CTATGATGTTACTGATGAAGAATGTACTGTAGGACTGCAGCCTAAGTTTCCATATAC

CATTGAAGAACTTGAAGGGGAAAGGAGAGTCGATAAGGAAGCTCGTCTAAGATAG

>Peaxi162Scf00304g00919.1

ATGGTCTTGCTAGCTGCAGCCATGAAGAATATGCAGGAACCGTATGACAAAAACGT  
GGGCTTGAATTCAAACAAGGGGGCTTGGTCTCCTGAGGAAGACCAAAAATTGATA  
TCTTATATCATGAAATATCGCATTGGAAGTGGAAATCAGATTCCCAAATTTGCAGAT  
TTAAAGAGAGGTCCATTTAGTATGGAAGAAGTGGAAACCATTATCAGAATGTATCA  
ATCGCTTGGTAACAGGTGGTCAGCTATATCTAAAGAACTGCCTGGAAGAACTGACA  
ATGAAATCAAAAATTTCTTCCCACTCATTTAAAGAAGCAATTTGGAACAAAGGTT  
AATGATCATGTTCAAGTGAAACGTAAGGCATCATGCAAAAAATCTAAGAAAGCTA  
AAGAATTGGAGATGAGAACAAGGGGTGAAACTCAAGAGAAACCAAATCAATCAC  
TAGATATGTCCTCCAGTGACATCACATTTGATGAAAACCATAACTGGGATTTACAA  
ATTTCTCAGAAACATCATCGGAAGACAACACTACTGTACTGTGAATTCACTTGTCAAT  
CAAGAAGCAGTTCCAATTATTGACAGCATGGTTATATTAGAGAGCAATCCTACGAC  
ATCTGAAAATCATGATCTTTATGTCCAAGATTTTCATGGATGAGACTGGTATTAATTC  
ATCTAATAAACTGCACAACAAAAACATGGGCACTAATTCAAAGAAAGGACCTTGG  
TCTCCTGAGGAAGACCTTAAATTGACATCTTATATCATGAAGTATCGAATTTGGAAC  
TGGAACCAGATGCCCAAATTTGCAGGGCTTCAAGAACTGGAAAAAGTTGCAGAC  
TTAGATGGGTCAACTACCTAAGGCCAGATTTAAAGAGAGGACCATTTAGTATGGAA  
GAAGTGGAAGTGTGATCAGAATGTATCAATCACTTGGTAACAGGTGGTCAGCTAT  
ATCTAAAGAATTGCCTGGAAGAACTGACAATGAAATCAAAAATTTCTTCCCACTC  
ATTTAAAGAAGCAATTTGGAACAAAGGTTAATGATCATGTTCAAGTGAAACGTAAG  
GCAACATGCAAAAAATCTAAGAAAGCTAAAGAATTGGAGATGAGAACAAGGGGT  
GAAACTCAAGAGAAACCAAATCAATCACTAGATATGTCCTCCAGTGACATCACATT  
TGATGAAAACCATAACTGGGATTTTCGCAAATTTCTCAGAAACATCCTCGGAAGACA  
ACTACTGTGTGAATTCATTGGAGCTGTTCCAATTATTGACAGCATGGTTATATTGG  
AGAGCAATCCAACAACATCTGAAGATCCTGATTTTTCTGTCCAAGATTTTCAGGGAT  
GAGACTAGTATAAATTCATCTAATGTGGATTTCTGGTTGGAGCTATACATGGCAGCA  
GAAAATCTGGCA

>Peaxi162Scf00304g01018.1

ATGCAGAACTGCACAACAAAAACATGGGCACTAATTCAAAGAAAGGACCTTGGT

CTCCTGAGGAAGACCAAAAATTGACATCTTATATCATGAAATATCGAATTTGGA  
ACTGGAACCAGATGCCCAAATTTGCAGGGCTTTCAAGAACTGGAAAAAGTTGCAGACT  
TAGATGGGTCAACTACCTAAGGCCAGATTTAAAGAGAGGACCATTTAGTATGGAAG  
AAGTGGAAACTGTGATCAGAATGTATCAATCACTTGGTAACAGGTGGTCAGCTATA  
TCTAAAGAATTGCCTGGAAGAACTGACAATGAAATCAAAAATTTCTTCCACACTCA  
TTTAAAGAAGCAATTTGGAACAAAGGTTAATGATCATGTTCAAGTGAAACGTAAG  
GCAACATGCAAAAAATCTAAGAAAGCTAAAGAATTGGAGATGAGAACAAGGGGT  
GAAACTCAAGAGAAACCAAATCAATCACTAGATATGTCCTCCAGTGACATCACATT  
TGATGAAAACCATAACTGGGATTTTCGCAAATTTCTCAGAAACATCCTCGGAAGACA  
ACTACTGTGTGAATTCACCTGGAGCTGTTCCAATTATTGACAGCATGGTTATATTGG  
AGAGCAATCCAACAACATCTGAAGATCCTGATTTTTCTGTCCAAGATTTTCAGGGAT  
GAGACTAGTATAAATTCATCTAATGTGGATTTCTGGTTGGAGCTATACATGGCAGCA  
GAAAATCTGGCAGGTTAA

>Peaxi162Scf00305g00045.1

ATGGGGAGACAACCATGTTGTGACAAAGTTGGATTAAAGAAAGGTCCATGGACAG  
CTGATGAAGACAAGAACTCATTAATTCATTCTCAGCAATGGCCAATGCTGCTGG  
AGAGCTGTTCTAAACTTGCAGTTATATTGGATGATGGCATTGGTGCAGGGCTTTTA  
AGATGTGGAAAGAGTTGTAGATTGAGATGGACAAATTATTTGAGACCAGACTTGA  
AAAGAGGACTCTTATCAGAATATGAAGAGAAGATGGTCATTGATCTTCATGCTCAA  
CTTGGCAACAGGTGGTCAAAGATTGCCTCTCATTTACCTGGTAGAACTGATAATGA  
AATAAAAAATCACTGGAATACACACATCAAGAAAAAGCTGAAGAAAATGGGGATT  
GATCCAGTTACTCACAAGCCACTATCCACTATTACTAATGACCATCCAAACAAACA  
ACAACCAAAAGATTTGCCAGTTATTCAACAAGAAAATTTACAAGAAATAATTATGC  
CACCTTCCTCAGTCAATGATGTCTCAGAAATGGATATTGAAACTCCAATTGAGCAA  
TCAGCTATTTCAGAAATCAAAGTAGAAGAAGACAACAATAACAAGAACATGGAGA  
CTACAAGTTGCAAAAATAATATCAATATTAGTTTTGACTCAACTACAGTGGAAGTCA  
ACAATAATGGCTTTTGTACCGATGAAGTCCCATTAATTGAACCCCATGAGATTTTAG  
TCCCTAATTCTGAATCAACCCCTCAACATCATCATCATCATTATCAACTTCTTCTTC  
TTCATCATCATCAATCCTTGAAGACTTGAAATTTTTGCCAAGTTTGTATGAATGGCC  
AAGTGATTATTACAACATGGAGCAAAACAACATGGGACTTGGCTGGGAAAATGAT

TTCAGTAGCACCTTGGATTTCTTGCTTAATGATGATAATGATATTAATCAATTTCCAA  
GAGATGATGAATCTTGGAAGTTTGATCAGCTGTTGTAA

>Peaxi162Scf00311g01112.1

ATGGGAAGAGCTCCTTGTGTGACAAAGAAAATGTAAAAAGGGGTCCATGGTCAC  
CTGAAGAAGATGCAACACTAAAGTCCTACATAGAGAAACATGGTATTGGAGGGAA  
TTGGATTGCTCTTCCACAAAAAGCTGGGCTTAGAAGATGTGGAAAAAGCTGCAGA  
TTGAGATGGTTAAATTATCTTAGACCAAACATTAAACATGGAGAATTCTCAGATGA  
AGAAGACAGAATAATTTGCAGCCTTTATGCTAACATTGGAAGCAGGTGGTCAATAA  
TAGCTGCTCAGCTACCAGGCAGGACTGACAATGATATCAAAAACTATTGGAATACC  
AAGCTCAAGAAGAACTCATGGCTCTTGACCTATCATCTCAGCAAATCAGTCCAAA  
TTACCAAAGTACTCCTACATATCACTCATCAATTTCAGCTCTTCAATCCTCATCGCAT  
AATTCATCACTATATTCTTCTCCATCACCATCTCTCTCATTAAAATCAACAGCTTATA  
AATATACCAATAGCCATTTCTATCCTATTTCAACAGCTACTAATTTCCCATGCAATGA  
AACCATTATTTCTAGTCCATCAAGTAAATTCTTGAACCTCTCCTAGTTATATGTACAAT  
GGGGTAGAAGAGAAACAAAGTAACTCCAAGTTCTTGATTACAAATGGTAATGATTA  
TGCTGAAAAAAAGCCTAAAGGAAAAGGTTGTTATGACGGGGAAAATTCATTAGAA  
TGTAGTTTGGAGGAGATTAAGAAGCTTATTAGCACTACTAGTATCCATGATAACAAC  
TTCAACAACCTCTTTAGTGACGAAAACAAGATAGAAGAACAAGTCATGATGTCTA  
CTGATGTTGATCATAATTGA

>Peaxi162Scf00330g00418.1

ATGGATGAATTGATGAAATTAGAAGGCTGCTGTACTGAGAATAAGCAATCAACAGC  
TGCTATGAGCTCGTCGGTTTCTGAAAATAGTGGTAGTCTAACTGTAAAGTCATTGG  
AAGTATGTAGCCCAACGCCTACATCACCAGCTCATCGGAGAGCCACTGGTCCAATT  
AGACGAGCGAAGGGTGGTTGGACTCCTGAGGAGGAAGAAAAAAAAAAGTTGGCTT  
TGTTTAACCACTGATGCATATGCAGCTGAATTCTTTACGGATAGATCAGAAGTGCAA  
TGCCTGCATCGATGGCAGAAGGTTCTGAATCCAGAAGTTGTAAAAGGACCGTGGA  
CTCAAGAGGCTGGTTTTTCTTTTCCTTTATATCAATCTGAGGATGATAAGATCATTG  
AACTGGTGGCAAAGTATGGCCCTATAAAATGGTCTGTCATAGCCAAATCATTGCCT  
GGTCGAATAGGGAAGCAATGCCGTGAGAGGTGGCACAATCATTTGAATCCAAATAT  
TAGAAAAGATGCCTGGACGTTGGAGGAGGAATTAGCACTCGTAAATGCTCACCGG



GTCTACGGGAACAAGTGGGCTGAAATAGCTAAAGTCCTACCTGGAAGGACTGATA  
ATTCAATCAAGAACCATTGGAATAGCTCTTTGAAGAAGAAGTTAGACTTTTATTTG  
GCAACTGGAAACCTTCCACCTGTTGCTAGAGATGTCCTTCAAATGGTTGTAAGGA  
CACTGTCAAAACAGCTTCAGCTGAAAAGGCACTTGTTTGCTCACATAAAGGGTCA  
GATTCAACTGAAGTTGCCTCATCAGGAACAACCTGACGTATGTAACTAGAAAATG  
GTGACAAAAACCATCAAGATACCAAATTGCTGGTTGCGAATATCGGTGCTTCAATT  
AGTGGACCTCAAATGGTTCTGATTCTGAAGTGGTTAGGTGGGAGGCAGAGTCAC  
CAGTAATAGATACTATCCACGTCAAGCCAATTACACAAATCAGGTTTGAAGGCTAC  
GGAATAAATAGTGAAGTTGATCAATTTAAGGTCATTGAAACTCCTTTTTCTTGTA  
ATACCTACATGTGGTACATTGTACTACGAACCACCACAGCTGGGAAGCTGTATTC  
AGTGGATTGAGACCATCTGAATATTCGATCGCGACTTTGTGAATCTGATGCAAGTCC  
AAGTTTGTACCCAGTTCTTTCTCGACTCCATCTAGTCTGAAGGGTAGTAGCTTGT  
ATGCACAAACCCCTGAATCTATTCTGAAAATTGCTGCTAGAAGCTTCCCAAATACA  
CCTTCCATATTCAGGAAGAGGAAGTTGAGCTCCACGTCAAGTAATAAAATTGGGA  
ATGCAGATGGAGATACAAGCAAGGATGAAGTGCATGATGCTTGTGAGGAGAAACA  
AACTGACAGTTCAGAAAAATATGGCATGCATAGGGAAAGCTCTTCAAGAAATCCTT  
CTTACAATGGCATCGGGCCATGCAATACTAAAGCTTTTAATGCCTCTCCTCCGTATC  
GATTAAGGTCTAAGCGAAAATCCATTTTCAAATCAGTGGAGAAACGGCTTAAGTTT  
GCATTGACAATGAGCAGCCTGATAGTACTGGAATTAGTGATTGAGCTGCTAAAGA  
GACGTCACAAGTAGCCAAAGATTGA

>Peaxi162Scf00342g00113.1

ATGAGCATCACAAGCGAAACTGATGACTGGATGACATCCAAAGTTGACATGGATTG  
GCCAGACGAAGCTAATGGTGGAGGAAATGTCGGAGGAAGTTTACCACTCAAAAA  
AGGTCCCTGGACTTCTGCGGAAGATGCAATTTTAGTGGAATACGTCATGAAACATG  
GTGAAGGGAATTGGAATGCTGTCCAGAAGCATTCCGGACTTGCTCGTTGTGGTAA  
AAGTTGCCGTTTTCGGTGGGCAAATCACCTGAGACCTGATTTAAAGAAAGGTGCA  
TTCACCTTTGGAGGAAGAGCGGCTGATAATTGAGCTGCATGCTAAGATGGGAAACA  
AATGGGCGCGAATGGCTGCTGAGTTGCCTGGCCGCACAGATAATGAGATAAAGAA  
CTACTGGAACACCAGAATAAAGAGACTACAGCGTGCAGGCTTGCCAGTTTACCCT  
CCCGATATTTGTTTCCTGGCAAGTCAGAACAAACAAAATGAGGAGTTGGCTGGATT

ATCCTCTACAGATGCACAACATCCTGGTCTCGTGGCAACTAACAATTTTGATATTCC  
TCCAGTGGAGTTCAAAAATTTAGAACTCAATCAGCTGTTGTGTCCACCAGCACATG  
TTGAAATTCCTGCAAGTAGCTTGCTTGATATTCCTGCAAGTGGCTTCCTAGCCCAG  
GTTTCATAGCGCTCCCTATAGTAGTACGTCTCTTCTTTCTACAGTGCATCCCTCCAAG  
CGTATACGAGGATCAGAATCCATGTTCTCTGGTTCAAATGGCGATCTTTTCCTAGCC  
TCCTGTCAATATCAGAATGGTGGTTCTTTGATTGCTCAGCCCTTGGGATTCTCATCA  
TACAATCATAATTTAACATATGATGGTCAGCAATCATTCTCGAATGTAATTCGGGGC  
AGCCATGCCCCCTTTAAATGGCAACTCCTCTACTTCAGAGCCCACATGGGCACTGAA  
GGTGGAGCTCCCTTCACTCCAAAATCAGACAGCCAATTGGGACTCACCTTCCTCTC  
CTCTTCATTCACTAGAGTCCGTTGATACACTGATTCAGTCACCTCTAGCTGGACAC  
AGTGAATCGGTTAGTCTATCACCTAGGAACAGTGGTCTACTGGACGCTGTGCTTTA  
TGGATCACAACTATGAACTCTTCGAAGGATAACTCAAACCAGGCTAAGGAGGAG  
ACGTCTGCTGATGCAGTCGGTAATTCATGTCCAGATCTCCTTGAGAAAGGGTGGGA  
AACTTATGGCGATCCAATCTCTCCGTTAAGTCGTTTACCTGCATCAGTATTTACTGA  
ATGCACCCCTACCACTGGAACTCATTACATGAGCTCCAGTCAACATCCAGAATGC  
CAGGTGAGAATGGATGCAATGTCAAGCAAGAGAATGCTGATCAAGCCCCCTCTGA  
TGGGAAGGATGACATGTTGAACCAGACGATCTTTGCATCTAATTGTTCTAGCCCCA  
AGACACAGCACACTAAGAACAATCTGGCACTGAAAAATGCTTTTGGTTCTGGCTT  
TTTCGATGATTATGGCTGGGACTGCAAGCAAGTCCATTCAGTAGCCACATCATCAG  
GTCAAGCTTGTGGACGAGATTCTGCTTGGGATGCCATGTCCGCTATGTAG

>Peaxi162Scf00349g00057.1

ATGAGAACCCCATCATCATCAACAACAAGCAACAAAGTAACACCATGTTGCA  
GCAAGGTAGGGTTAAAAAGAGGTCCATGGACACCAGAAGAAGATGAAATATTGAC  
AAATTATATAAATAAAGAAGGAGAAGGACGGTGGCGAACGTTGCCAAAAAAGGCG  
GGGCTCCTCCGTTGTGGAAAAAGCTGCCGCCTTCGGTGGATGAATTACCTCCGTCC  
TTCAGTTAAACGTGGCCATATTGCACCTGATGAAGAAGATCTCATTCTTCGCCTCCA  
TCGTCTCCTTGGCAACAGGTGGTCCTTGATAGCTGGGAGAATTCCAGGGAGAACA  
GATAATGAGATAAAGAATTATTGGAACACTCACCTTAGCAAGAAGTTAATCAGTCA  
CGGAATAGATCCTAGAACTCACAAGCCATTGAAAACTCTAATTCCTCAAGTGATG  
ATATTACCAACAAATTAGCTTCTTCTCTCCTCCTTCATCCTCAAAGCAAATGATC

TCAATCCAATTCTAAGCCCCACTTACATTTCTAGTTTTCAAATGGAAGAACCATTAG  
GAAAAATCAATACTCACCCGGGAGAAATTACTAGTCTTGATGATCAATATCAAAGT  
AACGCGATTCTTGCCGAGTATGGTGATGATCTGAATATTGCGGTTACTATTGAGGAA  
GATGTTGAAATGAATTGTTGCACGGATGATGTTTTCTCCTCTTTCTTGAATTCTTTG  
ATCAATGAAGATATGTTTCGCTTGCCAAAACCAACAAACCAACGGGACGTTCCAAG  
ATTTTGATCCTTTTCATGGCTTCATCATCTACACCTTCATCTGATCAATATAATCCCAG  
TTAG

>Peaxi162Scf00354g00068.1

ATGTTTTCAGGGTTAAAACGATGTGGAAAGAGTTGCAGACTAAGATGGCTCAATTA  
CCTTAGACCGGACATAAAGCATGGAGGTTTCACTGAGGAAGAAGATAACATCATAT  
TAACTCTCTACACTCAAATTGGAAGCAGTTCAATATTGGTGAAAATTAGGTGGTCA  
GTAATAGCTTCAAATCTACAAGGAAGGACAGACAATGATGTGAAGAATTATTGGAA  
TACTAAGTTGAAGAAGAACTTTTGGAAGCTGCTGCAACAAATACTCTCAGCAAT  
TCAAATGCTTTCCTCATGATAAACTTATATGAATACTATTCCAAGAACTTGCTATG  
GGACTGATTCTACTAATTGTTCTAATATGAAATTCTACACATTTTCACATGCGATGGA  
CACAAATTTATTAGGACATTCAAGTCGTCAATTATTCCCTCTGCTTCCTGAGCTTAT  
GGAAATTCAAGAAAATGGTATACTTCAGCAAGCTGAAGAAGTCAAGTGCAGCTCC  
CTTGAGAACAGCTTTGCATCATTTTCTGGTAATATTGGAGTAGTCCAAGGCAATGA  
AGAGGATGGTTCTCTTATGTCTTTGAGCTCTGGAATTTTCATCATCTTATTATTATGAT  
CTTTTAAATGGCTTTAACTTTCAAGAGAATGTCGTTATGGGAGTTAACACAACTTT  
TCCAATTACTCTTCCAACCTCAACTTGTTGCAGCTGCAAGCTAACATTCCTGACAG  
TACTGATCAACCGTTCAAAGGGTTCGAGACTTATTAA

>Peaxi162Scf00362g00831.1

ATGGGAAGATCACCATGTTGTGAAAAAGCACATACAAATAAAGGAGCATGGACTA  
AAGAAGAAGATGAAAGGCTAATTGCTTATATTAGAACTCATGGTGAAGGTTGTTGG  
AGATCACTTCCTAAAGCTGCTGGACTTTTAAGGTGTGGCAAAAGTTGTCGTCTTCG  
ATGGATTAATTACTTGAGACCTGACCTTAAACGTGGTAACCTTACTGATGAAGAAG  
ATGAACTCATTATCAAACCTACATAGCCTTCTTGGTAACAAGTGGTCACTTATAGCTG  
GAAGATTACCAGGAAGAACAGATAATGAGATAAAGAACTATTGGAATACACATATA  
AGAAGGAACTTATGAGTCGAGGTATTGACCCTACAACACACAGGGCTATTAACG

AGTCTAGTACCACCACACAAAAAGTTACCACAATTTCTTTTGGTGCTGGAAATAAA  
AATAAAGATATTGAGGATCTGAAGATGATCAATGTCAAAGCTGAATCTGGACTTAG  
CCAAGAAGATGAAAATAGTAGCAGCAGCCAATTATTTCAAGAACAGTGTCTGATT  
TGAATCTTGAGCTCAGAATTAGCCCTCCTTACCAACAAAACCAACCAGATCACCAA  
GCTTTGAAACAAAGTCCAACAAGGGGCCATTTGTGTTTTGCATGCAGTTTGGGTAT  
CCAAAACAGTAACGATTGCAATTGCAGTAATGGTTGCAGTACTAACATGGGTATGA  
ATATTGCAAGTTATGATTTTTTAGGATTAAAAGCTAATGGTGTTTTGGACTACAGAA  
CCTTGGAGACTACTAAGTGA

>Peaxi162Scf00371g00087.1

ATGGGAAGAACACCTTGTTGTGACAAAAACGGACTTAAGAAAGGGCCATGGACT  
GCAGAAGAAGATCAAAAGCTCATTGATTATATTCAGAAGCATGGCTCTGGTAATTG  
GAGGACACTTCCCAAGAATGCTGGACTTCAAAGGTGTGGAAAGAGTTGCAGGCTA  
CGTTGGAGTAACTATCTAAGGCCAGATATTAAGAGGGGAAAGTTCTCCTTTGAAGA  
AGAAGAGACAATCATTCAACTGCATAGTATTCTTGGAACAAGTGGTCTGCCATTG  
CTGCTCGCTTGCCTGGAAGGACTGATAATGAAATCAAAACTACTGGAATACCAAC  
ATTCGTAAAAAACTTTTGAGAATGGGAATTGATCCAGTTACTCATAGCCCTCGTCTT  
GATCTTCTTGATCTTACCTCCATTTTCAACCCATCACTCTACAATCCATCTCATATGA  
ATAATATGTCCAAGTTGTTAGGTGTACAACCCCTATTAAATCCAGAGATTTTGAGAT  
TAGCCACTTCTCTTATCTTCCCAGCGCCAAAACCAAAATTTCTTATTGCCAAGTA  
ATTTTCAAGAAAATCAATCATGCGATTCCCAAGTCCAAAACCAAATGACCCCATTT  
GTCCAGGCTAGCCAAATTCAAATCCCTATTCAAAATATTTCAATTTGCACCCCTTTA  
AGTACTCCATGTGTTCCATTTTCTAGTGAAGCTCAGGTATGCAACAACCAAATATG  
GAACAATTCCCATCAAATCTTCCCTACTTTAGCGCACAAAATTGCCAGCAAAATGA  
GTGGCAATTAAACAATGGAATTGCATCTAAGATGAATGAACATAATTTTCCTTCACA  
AAATTACGTTTTCTCAACTTTATCAACGCCTTCATCAAGTCCTGCCTCATTCATTC  
GAACTCAACATGCATCAACAGCAGCAGCACAACCTTCTGAAGGAGAGAGAGAAAG  
TTATAGCAGCAGCATGCTGAACTTTGATATTCCAAATATTTTCGATGTTAATGAATTC  
TTGTAA

>Peaxi162Scf00377g00925.1

ATGAGTGAGATAATAAAGAAAGGACCTTGGAAGAGGAAGAAGATGCAGTGTTG

ATAAAGCATGTTAAGAAATATGGGCCCCGAGATTGGAGCTCCATTCGATCCAAAGG  
GCTTTTACAGCGTACTGGCAAGTCTTGTCGTCTTCGTTGGGTTAATAAACTTCGCCC  
CAACTTGAAAAATGGAGTGAAGTTTTCTGCAGAGGAGGAGAGAACTGTGATTGA  
ACTTCAGGCACAGTTTGGGAACAAATGGGCTAGAATTGCTACATATTTGCCTGGAA  
GAACTGATAATGATGTCAAGAATTTTTGGAGTAGCCGCCAGAAAAGATTAGCTAAG  
ATTCTGCGGAACTCAGCATCACAGCCTAGTAAGCCACAAAAGGATAACAACAAGG  
AAGCCCCTGCTCTTCAAAAAGTTCCCTCAGTAGAGGAACCAAAATTGAGTTCACC  
AGCAGAGGAAAGGTCTTTACCCATGTCCAGTGTTGCTCGTCATCCTATATGAATA  
ACTCTGACACAATCAACATGGTCCCATTGCCAGAGCTAGAGAATTCAACTTCACTT  
CCTTTTGAGCCAAACCTGCTGCAATTTGAGTTCCTCCTAATGACAAGAATTACCA  
GTACATTGGGACACAGACGTCCTCTCCTTTCCTCAGATTCCACTCCAACTGACT  
TTGGTCATCCATTGGGAAGTCAAGAATTACCAATGAAACTTGAGGAGACTGACTTC  
TTAGATTTTTTCGGGCAACTCAGTACTGCTTCTGACATAGGAAATGTGCAAGTCCC  
CCTTGTACCGTTGTGTTTCAGGACCAGACAAAAGCTCTGAAATTGTTGTGAAGAGA  
GAAATGGACAGCCCCCTTACACAAGATAGCTTCATCGATGACTTCCCCATGGATGT  
GTTTGATCTTATTGATCCACTGCCGAGCCCATCCGAT

>Peaxi162Scf00391g00621.1

ATGGGACGTTACCTTGTTGTGAGAAAGCTCATACTAACAAAGGAGCTTGGACTA  
AAGAAGAAGATCAACGCCTTATTAATTATATTCGTACTCATGGTGAAGGTTGCTGGC  
GTTCTCTTCCTAAAGCTGCAGGATTGCAAAGGTGTGGAAAGAGCTGTAGATTGAG  
ATGGATAAATTATCTAAGGCCTGATCTGAAAAGAGGGAACTTTACTGAAGAAGAA  
GATGAATTGATTATCAAACCTCCATAGTTTGCTTGGAAACAAATGGTCAGTGATAGC  
AGGGAGATTGCCAGGTAGAACTGATAATGAAATCAAGAACTATTGGAACACACAC  
ATTAAGAGAAAACCTCATCAGTCGTGGCCTTGATCCACAAACTCATCGTCCACTCAA  
CTCTACCATCACTACTAACATAACCACTTCTACCAAAAACATCTGCTTGGACTTCAG  
AAAAAACACATCAATAGCAGCTACCCCTTTATCTCAAAATGATCAAAAACCAATGT  
CAAGTTCAATATCTTCACTTGAAGATACCAAATGTAACAGTAGCACTACTGAGGAA  
GTACAGCCGTTAGATTGCCACCGGCAGCACCTCCGGTTACCGGTGAAGTGATGAT  
CAATCTTGAACCTTCAATAGGACTACCAATATTTAGGCCAAGATGACTGATCAGA  
GTAGTTCTATTTCTCCAATTCAGCTAAGGAGATGGGAGGAAAAACAGTGTGTTTG

TGTTGGCAAGTAGGATCTCAAAATGGTCAGCAGTTTTGT

>Peaxi162Scf00411g00008.1

ATGGTGCAAGAGGAAGTCAGAAGAGGTCCATGGACAGAACAAGAAGATCTTCAA  
CTTGTATTTTATGTAAAATTATTTGGAGATCGAAGATGGGATTTTCTTGCCAAAGTTT  
CAGGTTTGAAAAGAACAGGAAAGAGTTGCAGGTTACGTTGGGTTAATTACTTGAA  
TCCTGATCTTAAACGTGGCAAGATGACTCCTCAAGAAGAACGCCTTGTTCTTGAAC  
TTCACGCTAAATGGGGAAATAGGTGGTCAAGAATTGCCCCGAAAAATACCAGGGCG  
AACTGATAATGAAATTAAGAATTATTGGAGAACCCACATGAGGAAGAAGGCTCAA  
GAACAAAGGAAAAAACTTGTGTTTCTCCATCCTCCTCTTTTTCCAAGTGTTCATC  
TTCTTCTTCCATCACTCATGAAGAAAATGAGAGAACTTTTATGATACTGGTGGAC  
TCGAGCTCTTGCAATCAGCTGATGGACAAAAGAAAGTAAGTGGTCATGAAAAAGG  
CGAGAGCATGAAAGTGTACTCCATGGATGAAATTTGGAAAGATATTGAATTATCGG  
AAGAAAATGACACAATTACGAGTAATAAATTACCAGTTATGGCAAATGTCTCACCC  
CTGTGGGATTATTGCCCAGCCTCACTATGGATATCTGATGAAGAAGAAAGTAAGAT  
GTTTCCACCCTTTAGCGAACATGTCGATGATCATCTGCAGGTTTATAGCTTTGACAA  
AAAGAATAGGACATTTTAA

>Peaxi162Scf00420g00240.1

ATGGGAAGGCAACCTTGTTGTGATAGAGTTGGATTGAAGAGAGGTCCATGGACTAT  
AGAAGAAGACCATAAGCTTGTCAACTTTCTTCTTAATAATGGTATACAATGCTGGA  
GAACTGTTCCCAAGCTTGCAGGCTTGCAAAGATGTGGAAAAAGTTGCAGATTGAG  
ATGGATTAATTATTTGAGACCTGATCTTAAAAGAGGAACACTGTCTGAAGATGAAG  
AAGATCAAATTATACAGCTTCATGCTCGTCTTGGTAACAGGTGGTCTAAAATAGCAT  
CCAATTTTCCAGGGCGAACGGATAATGAGATCAAGAACCATTGGAACACTAGAATT  
AAGAAGAGATTAAAGCTTATGGGAATAGACCCTTTAACTCACAAACCACTTGAGC  
CAATTGACCACAAAAAATACAAACATCAACCAGATGATCATAGAACAGAATTGTCA  
AGAAGTGAAGACAGCAATTTTGACAATGCTAATAATGATTTTTTCAGTGCCAAATGA  
TGAGTACAACAACATGTTGTGTGGAAATTTAGAAGTGGAGTTGTGGAACAAAAGT  
TGTAAGTATGTCAAGTGTGACTTGTTATAGCTCTTCAACTTCTTTGGATGCTGAT  
GATTCTATCAATTTATCAACAGTATCAGCTGCTACTACTGAATCTTCAAGTAATTTAG  
CACCTGTTGAAGATCAACAAGATTCTATACAACAATGGATGGATTCACTTTTTTCAT

GTTCTGTTAATCAATTAGAAGATGACATGTTCTTCTTGAGAAAATACAATTAA

>Peaxi162Scf00428g00117.1

ATGAGGAAGCCAGAACATGGATCAGTGATGAAGGAGAAAGGAAATAATAACAATA  
AGGCTAAACTAAGAAAAGGGTTATGGTCACCAGAAGAAGATGAGAAGCTCATGA  
ATTACATGTTAACAAATGGACAAGGGTGTGGAGTGACATTGCTAGAAATGCTGGC  
TTGCAAAGATGTGGAAAGAGTTGTCGTCTCCGATGGATTAATTACTTGAGGCCTGA  
CCTCAAACGTGGAGCCTTTTACCTCAAGAAGAAGAACTCATTGTTTCATTTGCATT  
CTATTCTTGGAATAGGTGGTCACAAATCGCAGCTCGTCTTCCCGGGAGGACAGAT  
AATGAAATCAAGAATTTTTGGAATTCCACAATAAAAAAGAGGTTGAAGAATAACA  
ACAACAACAACAACAATAACAGTAGTAACAACAATACACCATCTCCTAACAC  
AAGCGATTCATCTTCTGATCTTAGGGTTCTCATGGGAGGATCAATATTTCCCATGCA  
AGGCCACGACGTAAATGTAATGGCAGGCTTATGCATGGATAATTCCTCATCTACAAC  
CTCAGCATCATCCTTGCAAGCCATAGTTCCAAACAACCATTTTAACCCTTTCCCTCA  
GCTTGATAGTACAAATTATGACATAATAGGTGCTGCAGGTTTGTACAATTTGCCACC  
ATGTTTAGGTCAATTTGGAAGTAGTAGTGGTCATGATGGCGGCGTTGTGGATTATGG  
TGTTGTGGAAGCTTATAGTAGTATGGGGTTAGGAAGTGACTTTTCAGTTCCTCCATT  
GGAGAGTGGTAATAAGGGTACAATGGGGGAGAACAGTAATATTGTAAATTTTAGTA  
GTAATGTTAGTGCTGTTAATGACTATTCTCTGTTTGACAAAAAGACAAATGGTAAC  
AACCAGCAGTTGATGAGTGATAGTAGTGATCAAAGCCTCAAAGTTGAAGATTATAT  
GGTTGGTTTTGGGAATAGTCATCATCATCATTGGCATGGAGAAAGCTTAAGAATTG  
GAGAATTTGATTGGGAAGGTTTGTGGCAAATGTTTCCTCCTTACCTTACCTTGATT  
TTCAAGTTGAATAA

>Peaxi162Scf00451g00059.1

ATGGGTCGATCTCCATGTTGTGATAAAGTTGGCTTAAAAAAGGACCTTGGACACC  
TGAAGAAGATCAGAACTCTTAGCTTATATTGAACAACATGGCCATGGAAGTTGGC  
GTGCTTTGCCTATCAAAGCTGCTTCTTCAAGTATTACATATACCGCTTATGGATTTGA  
TGACTTGCAATTTGTAGGCCTTCAAAGATGTGGGAAGAGTTGTAGGCTCAGATGG  
ACTAATTATCTGAGACCTGATATTAAGAGAGGAAAATTCCTCAACAAGAAGAACA  
AACCATCATTCAACTCCATGCTCTCTTAGGGAACAGGTGGTCAGCAATAGCCACTC  
ACTTGTTCAAAAGAACAGACAATGAAATCAAGAATTACTGGAATACACATCTCAA

GAAACGACTAACAAAAATGGGAATTGATCCAGTAACTCACAAGCCAATGAATGAT  
ACCCTTTTGTCCACTAATGATAATGTTTCAGTCCAAGAACTCTGCCAATCTCAGCCA  
CATTGCTCAATGGGAAAGTGCACGTCTTGAAGCTGAAGCTAGACTCGTTAAACAA  
TCAAAATTTTCATTCCTATAAATTGGACACACCCCGGACGAGTACATTTTTTGACCAC  
TATAGTTCCCAAGAATTGTTAACCCCTTCTTCTTCTTCTAGTCATTTAAAAAATTTGA  
TGCCAGTTACATCAGGACTTCAAGATTTCAATTTTGTGGAGAGGTCTACAGGTTTT  
TTGCTTTGTACTTCAGCTGATGGGAATTTATCATCAGGTGGCATGGATTCTGATAGC  
AGTGGAATGCTAGTGAACAATGTGAGGATAACAATTATTGGAATAGTATTCTTGAT  
TTGGTGAATTCTTCACCTACTGAATCCACAATGTTTTAG

>Peaxi162Scf00452g00412.1

ATGGGTAAAGGGAGAGCACCATGTTGTGATAAAAGCAAGGTGAAGAAGGGGCCA  
TGGAGTTCAGAAGAGGATCTCAGGCTCATTACTTTCATTCAGAAGCATGGTCATGG  
CAATTGGCGCTCCCTTCCAAAACAAGCTGGGCTACTGAGGTGTGGAAAGAGTTGC  
CGTTTGAGGTGGATTAATTACCTAAGACCTGACGTAAAGCGAGGAAATTTCACTCC  
ACAGGAAGAGGCCACTATTGTCAAATTGCATCAATCTTTCGGAAACAAGTGGTCA  
AAGATTGCATCTTATTTGCCTGGAAGAACCGATAACGAGATTAAAAATGTATGGAA  
TACACACTTGAAGAAACGTTTAATGAAAAAATAGATGGTAATCAAGCTAAAGATG  
GTCGTAGTTGTGTTTCACCACCCTTTTCCCCTTCTTCATCAACTTCAGTAGTGTCAC  
ATACTAATTGGAGTCAAGATATCAGTACTAAAGCCAATGAGGTAGAATTCAAGGAT  
GACATGTTAGCTGAGAAAGAACCTAAAGAAGCTACAAAATCTTGCTCTCCAACTA  
CTTCATATGGATCAAATCTCTCCAACTTGAGCCAAGTTGAGATTTCAGTCCAAAA  
GGATTAGATATGGATAATTGGATACTAAGCCCAAAGGTGCATGATATCCATGATGAT  
GGAGTGATCGAAATCCCATCAATGGAATCTGATATTGATTTTTGGGACATGTTAGAT  
ATTTTGGACCCTTCTCCTACTACTACAATACTACTTCTAATTCAGACTCCAAACAG  
GACAATCAGCCAGTTTGTCAAGGAGTATCAGATTCTGAATGTCAAAAGTGGTTGA  
GATACTTGGAAAATGAATTGGGTTTAAGTCAAAGTACTGGAGCCAATTGTTACGAG  
TGCACTGATGCTGTTACATCCCAAGACAAAGAAGCCCATCCGTTCACTACTTAA

>Peaxi162Scf00485g00916.1

ATGGGAAGATCACCAATTACTTCTGATAAAAGTGGACTCAAGAAAGGTCCATGGA  
CCCCAGAAGAAGATCTCAAGCTCATCCAGTATATTGAAGTTCATGGTCCCGGAAAT



TGGCGTAGCCTCCCTAAAAATGCTGGTCTTCAAAGGTGTGGAAAGAGTTGTCTGTC  
TTCGCTGGACGAACTACTTGAGACCAGATATTAAGAGAGGAAGATTCTCTTTTGAA  
GAAGAAGAACTATTATCCAACCTCACAGTGTTCTTGGCAACAAGTGGTCAGCCAT  
AGCAGCTCGCTTGCCAGGAAGAACTGACAATGAAATCAAGAATTATTGGAATACT  
CACATAAGGAAAAGGCTTCTAAGGATGGGACTTGATCCAGTAACACACAGCCCTC  
GTCTTGATTTATTAGACTTATCATCCCTCTTCAACTCCACACAACCTTAACCTTTCAA  
GTTTACTAGGACTACAAGCACTTGTA AACCTCAATTTTTGAGACTCGCCACTACT  
CTTTTGACATCCCACACTGAAAATAATCAAGAAATGTTATTACAAAGACTTCAAGC  
AAACCCTACTGTATAG

>Peaxi162Scf00503g00613.1

ATGCAGAATTTGAAGAAAAGTGGAAATAGTAGTGGTGATGTTGCTGCTGCAAAGC  
CTAAAGAAAGACATATTGTTTCTTGGTCTCAAGAGGAGGATGATATATTAAGAGAG  
CAAATTCGAATCCATGGAACCTGACAATTGGACGATCATCGCTTCAAAGTTCAAGGA  
TAAACAACAAGGCAATGCAGAAGAAGATGGTTCACCTATTTGAACTCTGATTTCA  
AGAAAGGGGGGTGGTCACCTGAAGAAGATATGCTTTTATGTGAGGCTCAAAAGAT  
TTTTGGTAACAGATGGACTGAAATAGCCAAGGTGGTTTCAGGCAGAACGGATAAT  
GCTGTGAAGAATCGATTCACTACACTATGCAAAAAGAGAGCAAAACATGAAGCTT  
TGGCTAAAGAAAACAGCAATTCATTCATCAACTTAAATAACAAGAGAGTTATATTT  
CCAGATGGGCTCAGTATTGACAAAATAACAGAAGCTGCTGCTCCTATTAAAAAGCT  
GAGGATGAGCGGTGTTTCAGATGTCCCTCAGGATGGTAGCAGTAAAGGGAACCTCT  
TTCGGTGATTGTGGAACCAACCCATCCATTACTAAGACACCCATTTGCTGTACTAGCT  
CAAACTTCCATAATGCTGCGGGAACTTGGCATCTCATCAGCAGGTCAACAACAT  
GAAAGAATCAACTGAAAATGCAACTGACAGTAAACTCAAGGAACATTCCTTAAG  
AAAGATGATCCAAAGATACACGCTTTGATGCAACAAGCCGAGCTGCTGAGCTCAC  
TAGCAATGAAAGTGAATACAGAGAATACAGATCAAAGCCTTGAAAATGCTTGGAA  
GATACTCCAAGATTTTCTTCATCAAACAAAGGAAGGTGATATGCTCAAGTTCCAGC  
TCCCTGAGATGAATATTGATCTTGATGACTATAAAGACCTGATGGCGGATTCAAGG  
AGCAGCAATGAAGGCAGTCGACCATCTTGGAGGCAACCTGCTTTATCCGAAGATT  
CTGCTGGCAGCTCTGAGTATAGTACTGGATCAACTCTGCTATCCCATGCACTAGCTG  
ATAAACAGAAGAAAGCCAAGCTGAGGGGTGTGCACACCTTCAGGACATCGAATC

TGAATTACGAAATTCTCAGATGAGTGATCAAGGTGGGATTCATGAATCAGAAAATG  
GAACTTCCTGCCGTGTATCCACCACTCCAGATACTTTGCCAGTTTGTGATGAAGAA  
AAAGCAAATAATGGACCAGCTACGGCCGAATGTGAATTTCTGAATACAGATTTAG  
TTCTCCTCTTCAAGTGACTCCATTGTTGATGATCTTTAGCTGAAACAATTCCCACTCC  
AAAGTTTTTCAGAAAGTGAGAGGCAGTTCCTATTGAAAACACTTGGAATGGAGTCT  
ATAACCCACATCCAGGCACAAATCTTTCACAACCTCCATCGTGCAAAAGAGCCCT  
CCTCCATAGTCTATAA

>Peaxi162Scf00515g00013.1

ATGGCTTTTCAACTAACCATGCAAGAAGAAGAATTGCGAAAAGGGTCTTGGCACG  
AAGAGGAAGACGAGAGACTGGCATCTATTGTTGCCATTTTAGGTGAACGTCGCTG  
GGATGCCTTAGCAAAGGCTTCAGGGCTAAGGAGGAGTGGGAAAAGCTGCAGATT  
GAGATGGATGAATTACCTTAGACCCAACTTAAAGCATGGTTATATTACTGCAGATGA  
AGAACATCTGATTGTCAAACCTTCAAAAACAGCTTGGAACAAGTGGTCAAAGATT  
GCTAAACAATTGCCAGGAAGAACTGATAATGAAATAAAGAACCATTGGAGAAGTC  
ACTTGAGAAAGAAATCACTTATTTATGAACAAGAATGCTGTGGAAGCAATACAAGT  
AAATCAGGACAAATATCATCTGCTTCGAAAAGTGATAGTATCAATACTCCTAATAAT  
AGTACTGGTGACTCCATTTCTGGAAAAGATGATTGCTCCTCTGCTGATTCAAATGA  
AACAGGATTATCGGATTGGATACCAAGTTGGTCATATGAACAAAGTCAAATGGAAC  
ATCACATGTACCTTTGTAGATTAACTTATGTTTTTGTATCCTCAGTGTTTTTCTGA  
AGATAATAATATTAGTACATGGGGTGATACTTCATCTTCTATCTGGGAACAGTAG

>Peaxi162Scf00516g000673.1

ATGGGAAGATCAGCAGAATCTGATGATATGAGTGGGTAAAGAAAGGTCCTTGGA  
CTCCTGAAGAAGATCAACAGCTACTAGATTACATCCACAAGAATGGCCATGGAAAT  
TGGAGAGCTCTTCCTAACTTGCTGGACTTAATCGCTGTGGAAGAGTTGTCGCCT  
CAGGTGGACTAATTATCTCAGGCCTGATATTAAAAGAGGCAAATTCTCCGAAGATG  
AAGAGCGACTCATCATCAAACCTCCATTCACTCCTTGGAACAAATGGTCAGCAATT  
GCAACACGTCTACCAGGACGAACTGATAATGAGATAAAGAATTATTGGAACACTCA  
TCTGAGAAAGAAGCTACTCCAGATGGGGATTGATCCAGTAACTCATAGGCCTAGAA  
CTGATCATATCAATATTTTAATGCCTTAATTGGGAATATACCTCCTCAGCTGCTTGC  
TGCTGCTTCCTCCAACCTTTATGAATACCGATAATACTTCCATCAACAATCTCACTAA

CATATTGTTTTTCAGATACGGCTCAACAAC TAGTTCACCAAATCCAATTGTTACAGAA  
CTCTAGTAGCTTATTAGTTCATTCCCTATTTAATAACGCCGCCACGTCAACTGCTTGT  
CCCTTAAACATGGAAGGTTTGAACCAAACTTTGGATTACAAAATCTTTGTGATCA  
GAATCAGCTTCAGGAGTACAACCTCTATCCTAATGAATTACCAGCAATTTCTATCAAA  
CACTAGTGACTCATTAACTGGTTTTGCTCTCAATTCCTCAAACAGTACAGATATTAG  
TGCAACTAATGGATGTGATCAACTGATGGTGATGAGTGGTACATGCAGCACATCAT  
CATCATGTGGGAATAATGCTGCAAGTGTTACTCATGCAAATGATGATCAAATGAAA  
AATATCAGTAAAGCTGCACTTCATCATGACACCCCTGAGTGTCCAAGCAGTAGTAA  
CAAAATGCCACAGGGAAACATGATCAGCGATATCTACCCGAAACAAGAACTCGTC  
CAGCCTTCATCTGCATCAATGTCCACCTTTGAACCGTGGGGACAAATTATGGGTGA  
TGAAGAAGCAAGCGACTCTTACTGGAGAGACATCATAGAGTAA

>Peaxi162Scf00521g00814.1

ATGGCAGATAAAGGACAAAGTTCTTCATCTGTAAATACTCCGGCTGATTCTCAAGA  
TGTGGTGGCTCCTCGGATGTTAGTTTCAGGAAAGACATCGAAAGTAGCTGAAATA  
GAATTCTCTGAAGAAGAAGAAGACTTGATCATTAGGATGTATAATTTGGTTGGCGA  
GAGATGGTCTCTTATAGCTGGAAGAATCCCAGGAAGAAGTGCAGAAGAGATTGAG  
AAATATTGGAATACTCGATCTTCAACCAGCCAATAA

>Peaxi162Scf00523g00004.1

ATGAATAGGCTATTTGAGTCAGATTCAGTCAAATTCAGTAAATACTCAAATAGTTTG  
TGGAATGCTCTCTCATCTGGTGCTAATTTTAACAGGAGAACTAGTGGTCCTACAAG  
ACGTTCCACAAAGGGGCAGTGGACTCCAGAAGAAGATGAAATCCTCCGCAAAGC  
TGTCCAACGTTTTAAGGGGAAAAACTGGAAAAAGATAGCGGAATGTTTTAAGGAC  
CGAACTGATGTACAGTGCTTGCACAGGTGGCAAAAAGTTCTTAACCCTGAACTTG  
TCAAGGGTCCTTGGTCTAAAGAGGAGGATGAAGTAATCGTTGAATTAGTTAAAAA  
GTATGGCCCCGAAAAAGTGGTCCACTATTGCTCAACATTTGCCAGGGCGTATTGGAA  
AACAGTGTTCGGGAAAGGTGGCACAATCATTTGAATCCTTCAATAAACAAGGAAGC  
TTGGACACAAGAGGAGGAGTTGACTCTGATTCGTGCCCATCAAATATATGGGAACA  
AGTGGGCAGAGTTAACAAAATATTTGCCTGGAAGGACAGATAATTCAATAAAAAAT  
CACTGGAATAGTTCTGTCAAAAAGAAATTGGACTCGTACTTGGCATCAGGTTTACT  
TGCACAGTTCCCTGCTCTACCTAATGTCAACCATCAGAACCAATCAATCCCCTCTTC

TGTGAAGTTGCAACAGAGTAGTGAAGATGATAGTGTTTCGTAAAGAAGGAACAGAA  
ATGGAGGAAGTTTCAGAATGTAGTCAAGGTTCAAATCTTGCTGGCTGTTCCCAGTC  
TACAAGTGACATGGGCAACAGATTTGTACATACAAGAGAGGACCGCAAACCTGCTG  
GAGGATTCAAATTATAGGATGGACCCAAGCTCCAGCTCAGCACCATGTTTCAGAATA  
CTATACCCCGGCTTTTGATGATATTACCTTTTCAATGGAGGAAGTGCCTAGCGAACT  
TTCCGAATCCAAGTTCCTTGAGCAGAACCTCTCACATGACTGGCGAACTTCCATGG  
GGAAAGATTGGCAGTTTAATCCAGATGATGACATACCAGATATTTCTCCTCTGGAGT  
TGATGCAGGAATCTTCAGGGCTCTTCATGCAATGTTTAACTGGTAATGGGAATCAC  
GATATGGTAACCTTTCCACAGAAAAATGCAATGTCTTTCGGGACGACGACTAATAT  
GGGAGGCATGGTTGTGGGTTTAGATAAGCCCACCGAGATGTTTACTTCTGTGGACG  
ATTGCAGGATGGTATACCCTGAGGCAGGAATTCCTCAATGCTTTCCTTCTGAACT  
GGTATGAATGGTGTGATGAACTGCGGATTCTTTGATTTACCAATCATCGAATTAT  
CAGATCTCTGAAGCTGATATGTCTATAGAAAAGTGCAACCCTCTGTGTTTCAGATGT  
TATGGGAAGTCAACCATTTTCTGTTTCCTTCACAGTTTTCTTCAGAGCAAAGCTCCT  
CCATGTTTGGTACTGTCTCGAATCAGTTTCATGATCTTTCGCATGGAAACCCAGCAC  
TGGAGTCCCACACAAGTAAATGTGATGCTTTTCTATATCCCGTTGAATCTGGTACTC  
CTTGTGACAACATAATGAACGATCCTCTCCTGAAAGAGCAACTGCATCAAACAGA  
AGATTCTGTACAGCTAGTTTCTGTGAATGACTTTAGCTCCACTCCTCCAAGTACTCT  
TCAAACACGTCCATTGGTGAATGAAAATTTGCCTGTGCCAGAAGAGCAGAAGGAT  
GCGGGAGCCTTATGCTATGAGCCTCCTCGTTTTCCAAGCTTGGACGTTCCATTTTTC  
AGTTGTGATCTTATACAATCTGGTACAGATGCACAGCAAGAGTACAGCCCTCTTGG  
CATCCGCCAGTTGATGATGAGTTCTGTGAACTGTCTTACTCCATTTAGGTTGTGGGA  
TTCACCGTCGAGAGATGGTAGTCCAGATGCTCTTTTGAGAAGTGCTGCCAAAACCT  
TCACAAGCACACCCTCTATATTAAAGAAGCGACACCGTGATTTGGTGTACCTTTG  
TCAGAAAAGAGATGCGAAAAGAAGCTTGAAAGTGACTTCCGGCGAGAAGCATT  
TCTGATCTGGCTAGGGATTTTCTCGACTAGATGTTATGGTTGACGAGTCTGCAAAC  
GAGAAAGCAACAATTTCTTCTGCAACTGCAGATCAAGCGCTGGAACCTTCGAGCTT  
CATCTGAAGATAAAGAAAACATAAGTCCAACCTGAAGACGGAAGAAAGGAGGAGG  
ACAAGGGACATAATGGACTTTTGAGCAGCGGAACCTTCTGAGAGACAGTTAGATGG  
AGCTGATGTTCACTACAAAGAGCATGGAACAAGGGAGGGCAAAAGGGTTGGAGC

CAATGATGCAAAGGGAAAGATAAAACAGCCTTCTGGAGTTCTGGTTGAACTGAAC  
ACAAGTGACCTGTTCTTTTCTCCTGATCGATTTGGAGCCAAGTCAGATAGAGCTAC  
AAATCTAAGCAATAAAGCTCTAGGAAATCAGTATGCTAGACGACTAGAAGCTGCAT  
CAAATCAAGGTTCTGTTTCTTCTTCATTTGAGACTTCATGTTTGTCTGTTATTTGCTC  
ACCACGTATACGTGGAAAGAAGGATGGAAGTAGTTTTATCATCACTACGTCAATGC  
AATCTGCTACAACCTCAACTGCCTTGGACAACTCAGCTGAAACTTCAGGAAATGG  
AGTTGGCGCAGAGACTGTAAACATATCTGGAGAAACACCTTATAAAAGGAGTTTT  
GAATCTCCTTCAGCTTGGAAATCTCCATGGTTCATCAACTCTTTTATGTCGAGCCCA  
AGGCTTGATACTGAACTTACTTTTGAGGATCTTGCGCTGTTTTTGAGCCCGGGCGA  
GAGAAGCTATGATGCTATTGGATTAATGAAACAATTAAGTGAGCAGACTGCTGGGG  
CATTTGCAGATGCCCAGGAAGTCTTGGGAGGTGAAACTCCAGAGTCTATCATCCGG  
GGAAGGAACTCTAAAAACCAGAAAGCAAATGAAAATCACTCTCTATTGTCAGCAA  
ATGCTGTGAGTGAGAGGCGCACGCTTGATTTCAGTGAATGTGGATCACCTGAAAA  
AGGAAAGGACGCTGAAAATTTTTGCACAAACGACCGTAGCTTTTCAAGTCCTTCT  
TCCTACCTCTTGAAAGGCTGCCGGTAG

>Peaxi162Scf00526g00820.1

ATGGTTGCAATAAAAATTAGACGCGATAAGGATATGAGTATGTCAAGTGAAAGCGA  
TGACATGATGACATCAAAAGTTGGTGTGGATTCGCCATCTGTCTGAAGAAGCTTGTG  
GTGGAGGAAATACCGGAGGAGGTCTACCACTAAAAAAGGCCCTGGACTTCTGC  
AGAAGATGCAATTTTAGTGGATTACGTCACGAAACACGGTGAGGGGAACTGGAAT  
GCCGTCCAAAAGCATTTCAGGACTTGCTCGCTGCGGCAAAAGTTGCCGTTTGCGGT  
GGGCCAATCACCTGAGACCGGATTTAAAGAAAGGTGCATTCACTCCAGAGGAAGA  
GCGGCGCATAATTGAACTGCATGCTAAGATGGGAAACAAATGGGCAAGAATGGCT  
GCTGAGTTGCCTGGCCGCACAGATAATGAGATAAAGAACTACTGGAATACCAGAAT  
AAAGAGACGACAGCGTGCAGGCTTGCCAGTTTACCCTCCAGACATTTGTTTTTCAG  
GCGATCAGCGAAAGCAAACAAAATGAAGATTTGGGTACGTTCTCTACAGACGGAC  
AATATTCTGATTTCTTGCCGGTGAACAATTATGAGATTCCAGCTGTGGAGTTCAAAA  
AACTGGAGTTCAATGAGCCGTTGTGTCCACCATCACTTCTTGATATTCCCGCTGGTA  
GCTTGCTTGATATTCCTGCGAGAAGCCTGTTGGCACAGGGTCTTAATTCTGCCTATT  
ATAGCCGGTCTTTCCTCTCAACGATGCATCCATCGAAGCGTATACGAGGCTCAGAA

TCTTTGTTCTCTGCTTTAAATGGTGATTCTTCTCCATTGAAAAATGAAGATTCTTTTC  
CAACCTGCCATCAATATCAGAATGATGGTACGTTGCTTGCTCAGTCCTTGGGTTTTT  
CATCTCCATATAATCAAATCCAACATCTGATCATCACCCATCATCCTTGGGTGTTCC  
TGGCAGCCATGCCCCTTTAAATGGCAACTCCTCTTCTTCAGAGCCCTCATGGGCAA  
AGAAGCTCGAGCTCCCTTCACTCCAAAGTCAGATGGCAAGCTGGGGCTTACCTCC  
TTCCCCCTCTTCCTTCGCTAGAGTCTGTTGATACAATGATTCAGTCCCCTCCAACTGA  
GCATACTGAATCATGCAATCTGTACCTAGGAACAGTGGTCTGTTGGACGCTGTAC  
TTTATGAATCGCAAACATGAGAGCTTCAAAGATAATTTACACCAGGAGAATTCT  
GGTGATGGGGCAGATGATTCATGTCCAGATCTCCATGAGACCGAGTGGGAAGCATA  
TGGTGATCCAATCTCTCCTTTAGGTCATTCTGCTGCATCTGAGAAGTTTGACGGGA  
AGGACGATACATTGAACCCGTTCTTTTCCAGGCCAGACTACTTGCTTGAATCCAAT  
TGTTTTAGTCCTATGCAGAGT

>Peaxi162Scf00540g00619.1

GGTGCAAGTGCTTTTCATCCCTATCAAATTTACCAAAAAATAATCTTCATGGTTTA  
CACCCAAATCTTCCTTTAACTGCTATAGATAGGTTCTTACTAGGTCATGAAAATTATT  
TTTCTCCTTTAAGTGGTGCAAATGCAACTAGTAGCCATGCAAATGAGGTTTCTTGG  
CCAACTCTAGAGCCAAGTTTTATGGAATTAGGGTATTTTCTCCATGAGCAAAGTGC  
TATCAATTACATGGATGATCATCAAGAGAATATCATGATAGTTGAAGCAGAGTCATC  
TCAAACAAACAAAAAGGAGAGCGTAAAAAAGCAAAAGAAGGCTATTCAACAAC  
AACTTGATCAAGGGTCAGTGGACTGATGAAGAAGACAGGAAATTGCTTAGGTTG  
GTAAAGCAATTTGGAGTAAGAAAATGGGCTCAAATAGCTGAGAAAATGGAAGCCA  
GAGGAGGGAAACAATGTAGAGAAAGATGGCATAATCATCTGCGTCCAGATATCAA  
GAAAGATAGTTGGAGTGAAGAAGAAGAGTTGATGTTAGTGAAGCACATAAGCA  
ACTTGGAATAGATGGGCGGAAATTGCTAAAAGAATTCCTGGAAGGACTGAAAAT  
TCTATCAAGAACCATTGGAATGCCACTAAAAGAAGGCAAAATTCAAGGAGAAACA  
AAACAGAAAAAATCCACAAGTTGGCCAAAATGAAGGCAAACATCGCTCTAATGT  
TCTTCAAGATTATATTAGAAGCAAATACTTCAATGACGACTCTTCCTCCACCACTAC  
CTCACACAAAGAATTTTTACATTATCAGACCAACACCATAACGCCAACTAATAGTA  
CCACCACCAATGCAACCCCTTCGTA CTCTAATGATGATTCGACATCTTTACTCACTC  
ACCAAACATATGATGAAGAATTGCAATTCATGCAAAATTTATTTGGGAAGAATTTCG

ATCTTGGATAACAATGGTGCTAAAGCCATTGATCACTCCATGGAGGACAAAGTAAC  
TCAAAATCTTTTTGACAATAAATACTCATCATCAAGCTTTTCTGCCTTCAGTTCCTT  
GGACTTTAGTTCGGATCCGCTGGCCTCTGAGACAAACATCACAACAAAAAGGGTC  
ATACACGATGCTGAAAATTACATGAACGATTATTATAAAGAGTCTACTATACATTGTC  
CCGACCTTTATCTTTCCTACCTTCTAGACGCTTCTACTTATTCTTCAATGCCTTTTGC  
TGAGGCCTCTGGATATGGAAGCATGAATATGGGAATGTTGATGAATCAAGGTAGTT  
GTTCAAGTGGAACAACAAGGAAGTTGATTTTATGGAGATGGCTTCATCTAATTCT  
CAATTCTCTCAAGGAACTTTACCAAACCCTTCTTTTGA

>Peaxi162Scf00543g00414.1

TCATTCAAAGAAGCAAGATCAGCAAGTAAACAAAGCAAAGGAAAAATGGGAAGA  
GCTCCTTGTTGTGAAAAGATGGGGCTGAAGAAAGGGCCATGGACTCCTGAAGAA  
GATCAAATTCTTGTCTCTTATATTGAAAAGAATGGTCATGGCAACTGGAGAGCCCT  
CCCTAAGCTAGCTGGACTTTTGAGATGTGGGAAGAGTTGCAGACTCCGTTGGACT  
AACTATTTGCGTCCAGATATTAAGAGGGGCAACTTCACAAGAGAAGAAGAAGATA  
CCATTATCCAGTTACATGAAATGCTTGGCAATAGATGGTCTGCAATAGCAGCGAGAT  
TACCGGGACGAACGGACAACGAAATTAAAAATGTATGGCACACTCACTTGAAGAA  
AAGGCTTAAAAATTACCAGCCTCCTCAGAACTCCAAAAGACACTCCAAGAACAAC  
CATGATTCCAAAGCACCTAGTACTTCTAAAATGTTAGACAATTCAGAAAGTTTTAG  
CACCATTCAAGAAAACATTAATGAGCCCATGACCGGTCCGAACCTCGCCACAACGG  
TCATCTAGCGAGTCATCAACTGTCACGGCCGATTCATTGGCCGCGACAGATGTTAC  
AAACGATGATCAAACGTTTATTAAGCACGAGGAAATGGACTCGTATGAAAATTTTC  
CAGAGATTGATGAGAGCTTTTGGACGGAGGATTTATCCATGGGAGATAATTTGGAT  
CTTGATATGGAGGTTGCTGGTGAAAAATCACAAGTTCAATTTCCATATTCTCATGAC  
ATGAAGGAACAAAGTGTCGACATGGTTGGAGCAAAATTAGAGGACGACATGGACT  
TTTGGTACAATGTTTTTCATAAAGGCTGAGGACTTATTAGACTTACCAGAATTTTGA

>Peaxi162Scf00566g00051.1

ATGGAAAATTTTAACAGATGTTCAACATCAACTTCATCTTCATCTGAATCATCATCT  
TCTGAATCTTCATTGAATAAAGCTGAGAGAATAAAAGGACCATGGAGTGCTGAAG  
AAGACAAGATATTAACAAAACCTTGTTGAACGTTATGGTGCAAGAACTGGTCTTTA  
ATAAGTAAATACATTAAGGGTAGGTCTGGAAAATCATGCAGGCTAAGATGGTGTA

TCAATTAAGTCCAAATGTACAACACAGACCATTTTCTCATGCAGAAGATGAAACCA  
TTT TAGCAGCTCATGCTAAATATGGAAATAGATGGGCTACTATTGCCCGTTTATTACC  
AGGT CGAACTGATAATGCTGTTAAGAATCATTGGAATTCTACGT TAAAGAGACGTT  
ACCAGCAGCAAAAAAATCACAACACAGTTATTTTTCCTGATATGAAAAATGGATCC  
GGGT CGGGTTCTGGATCCGGATCCGGATCCAGGT CGGGGTCCGGGT CATGTATGGA  
TTATTTGAATGTTGATGAAAGTCCAAGAGGGACTAATGTGAAAGTTGTTGTAAATA  
ACTGTAACAGTGAATATGATGACCCAATGACGGAGTTGTCCCTAGCGCCGCCAGG  
GATGGGCGGGGATGAGTTGCCGGAGAGGAAAACAGAGAGTTTTTCTGCGGGATTT  
TGGGATGTTATGAGAGACGTAATTGCTAAAGAAGTGAGGGAATATGTCGCTTCGTC  
GTTTAATGGAGCTTCTACAGGGTTTCCTTAA

>Peaxi162Scf00575g00016.1

ATGGGAAGGCCTCCTTGTGTGATAAAATAGGTATCAAGAAAGGTCCTTGGACTCC  
TGAAGAAGATATCATCTTAGTCTCATATATCCAAGAACATGGTCCAGGAAATTGGA  
GATCAGTCCCTACTAATACTGGTAATTCAGTTGGTTTTACTATCTTTTATATATTATGT  
TCTTCTCTCTTGATTACTTTTTAGAACTGTTACAATGAAGCAATTTCTTTGTTTT  
TAAAAGGGTTGATGAGGTGCAGTAAAAGTTGTAGGCTTAGATGGACAAATTACTTG  
AGACCTGGAATCAAAAGGGGTAATTTACATCACACGAAGAAGGAATGATTATAC  
ATCTTCAAGCTTTATTGGGTAACAAATGGGCTGCTATAGCTTCCTATCTACCACAAA  
GGACAGACAATGACATAAAGAACTATTGGAACACTCATCTAAAGAAAAAGCTCAA  
GAAATTTCAAGCAACAGGTTTGGATTCACAGAGTTTAGCTCCTTCAGATTCTAACA  
CTTATCAGTTCTCCTGGAATTTCCATGACTCAAAGTTACAACAGAACCAAACTCT  
AGTACTTCTTCCTCTTCAACCTTGATGCTTCAAGTACAGAGAATATTTCAAGACTT  
CTAGAAGGATGGATGAGATCTTCTCCAAACCCTTCTACAAAGAATATTGATGATGA  
GATCTTGCATGAAAATGATCAAAATCAAGAAGTTTATAAAAATTGTGAAAGTTCTT  
GGCTTCATGGAGGACGCAATAATACTATTGGAAGTACAAGTATTCCAAAAGAATAT  
TACAAATCAGTTATTTCTGAAAAATCAGCTTGTGATCAGAGCGGTGGAGCTGTTGA  
AAAGAGTTGTACTAATAATGCTCCTCCATACACATATCTTGAAAAGTGGCTGCTCG  
ATGAAAGTGCTGGTCAAGTTGAAGAACTTATGGAAGTCCGACCATATTCACATGA

>Peaxi162Scf00578g00007.1

ATGAAAACCTTCTGTTTTTACGTCGTCGGGGGTACTGAGGAAAGGTTTCATGGACTGA



AGAAGAAGATATTCTTTTGAGAAAATGTATTGAGAAGTACGGGGAAGGAAAGTGG  
CATCAAGTTCCTGTTAGAGCTGGTTTGAATAGATGCAGGAAGAGTTGCAGACTAA  
GGTGGATGAATTATCTAAGGCCACATATAAAGAGAGGTGACTTCTCTCCAGATGAA  
GTGGATCTTATTTTGAGGCTTCATAAGCTTCTTGGCAACAGGTGGTCACTTATTGCT  
GGGAGACTTCCGGGAAGAACAGCAAACGATGTGAAAACTACTGGAACACTAAC  
CTTCTAACGAGGGCAAAGTTAGGTCCTCCTCAGCAACACGATAGGAAATGTCCTA  
AAGCAATTAAGACCATGGCCAAGAATGCCATAATAAGACCTCAACCTTGGAACCTC  
TCAAAATTAGCAAAGAATAACGTCAGTACTATACACAAAGAAGAACATAGCAAAC  
AGGAAATTATCATTGAGAAGCCAACAACGGCCGAAGTCGTGTCCAGAGACGAGA  
ACGTTGAATGGTGGACGAATTTATTACTGGATAACAGCAACGGATTTGAGAAGGCA  
GCAACTGAAAGCACTTCAGCTTTTCAGAACATAGAAAGTTTGTAAACGAAGAAC  
TATTATCACCATCGATAAATGGTGGAACCTACTATCCCATGCAAGAACTGGAGAC  
ATGGGTTGGAGTGACCTTTCTATTGATGCTGACCTCTGGGAATTACTATAA

>Peaxi162Scf00578g00008.1

ATGAAAACCTTCTGTTTTTACGTCGTCGGGGGTACTGAGGAAAGGTTTCATGGACTGA  
AGAAGAAGATATTCTTTTGAGAAAATGTATTGAGAAGTACGGGGAAGGAAAGTGG  
CATCAAGTTCCTGTTAGAGCTGGTTTGAATAGATGCAGGAAGAGTTGCAGACTAAG  
GTGGATGAATTATCTAAGGCCACATATAAAGAGAGGTGACTTCTCTCCAGATGAAG  
TGGATCTTATTTTGAGGCTTCATAAGCTTCTTGGCAACAGGTGGTCACTTATTGCTG  
GGAGACTTCCGGGAAGAACAGCAAACGATGTGAAAACTACTGGAACACTAACC  
TTCTAACGAGGTCAAAGTTTGGTCCTCCTCAGCAACACGATAGGAAATGTCCTAAA  
GCAATTAAGACCATGGCTAAGAATGCCATAATAAGACCTCAACCTTGGAACCTCTC  
AAAATTAGCAAAGAATAACGTCAGTACTATACACAAGGATGAACATAGCAAACAG  
GAAATTATCATTGAGAAGCCAACAACGGCCGAAGTCGTGTCCAGAGACGAGAACG  
TTGAATGGTGGACGAATTTATTACTGGATAACAGCAACGGATTTGAGAAGGAAGC  
AACTGAAAGCACTTCAGCTTTTCAGAACATAGAAAGTTTGTAAACGAAGAATA  
TTATCACCATCGATAAATGGTGGAACCTACTATCCCATGCAAGAACTGGAGACAT  
GGGTTGGAGTGACCTTTCTATTGATGCTGACCTCTAG

>Peaxi162Scf00579g00055.1

ATGGTGAGAGCTCCTTGTTGTGAGAAGATGGGGTTGAAAAAAGGGCCATGGACTC

CTAACGAAGACCAAATTCTCATCTCTTACATTGAAAAAATGGCCATGGTAACTGG  
CGAGCACTCCCTAAACAAGCTGGATTATTGAGGTGTGGGAAGAGTTGCAGGCTCC  
GGTGGACAAATTATTTGCGTCCAGATATAAAGAGGGGAAACTTCACTAAAGAGGA  
AGAAGATACCATAATCCAGTCACATGAAATGCTCGGCAATAGATTACCAGGACGAA  
CAGATAATGAAATAAAAAATGTTTGGCACACCCACTTGAAGAAAAGGCTCAAGAA  
TTATAAACCTCCTCATAACACCAAAAGACACATCAAGAATGATGATTGGAAGGGTC  
CTACTACTTCTGAATCATCCATTAAGTCTGATTTTAATAGTGACACACAAAAAACA  
TTAATTCACCCCAACATTCATCAAGTGAAATATCAACTGTGACAGCCGAATCAGTA  
GTCATGACGCAGTCGCAGGCGATCAACGATCATGATCAAATGATGATTAAGCATGA  
AGAAATGGAGTCCTCGGAGTATTTTCCTGAGATCGATGAGAGTTTTTGGACGGATG  
AATTATCAACAGACAATAACTGCAATCACGTTGTGACGGCTGTTCCATTTTCCAGT  
GTGAGGGAGGAAAATGTGGACATGTTGACTACAAGAATGGAGGACGACATGGACT  
TTTGGTACAATGAATTCATAAAGACTGATGACTTGCAAGAATTACCAGAATTTTAA

>Peaxi162Scf00606g00073.1

ATGGGGAGGCATTCTTGCTGTTACAAGCAGAAGCTGAGGAAAGGACTCTGGTCCC  
CTGAGGAAGATGAGAACTTATAAATCATATTACTAAATATGGTCATGGCTGTTGGA  
GTTTCAGTCCCTAAACTAGCAGGTCTTCAGAGGTGTGGAAAGAGCTGCAGGCTAAG  
GTGGATTAATACTTGTGAGACCTGATTTGAAAAGAGGAACATTCTCACAAGAGGAA  
GAGAATTTGATCATTGAACTTCATGCAGTTCTGGGGAACAAGTGGTCTCAAATTGC  
TGCTAGATTACCTGGAAGAACAGACAATGAAATCAAGAACTTATGGAACCTTTCCA  
TTAAGAAAAAACTAAGGCAAAGAGGGATTGATCCAAATATTCACAAGCCACTTTC  
CGAGGTTGAGATTGATGAAAAGGAGTTAGCAAACAGCAAGAACAATGAGAAGGC  
TTCTGAAGGCTCCAGTGACCTCAATTTTATTGAAGTTCATGAGAATTCAAACCTTAC  
GAATTGCAACAGAGAAACCAAAGCCATCAGCTTCTTTAGTGACTATGGACCGATAT  
CCAAATGGTATGAGCAGTGCAGTCCCACCAACACATGAATTCTTCCTTAATAGGTT  
TGTCACCTCACATGAAAGCTCCACCGCTACTTGCAAGCCTCTTGACTTGGCAAGTT  
ATCTCTCTTTTCAGCAGTTGAATTATGGCTCAAACATTGGCTTGTCATGAATCCAA  
ACACCAATCCTCTTCTTTTCAACTCCAATTCAAAGAACTCAGAAATGGTTTCTCAT  
CATCAGTTCAATTCAAACATGCCAAATGATATTCTCCCTTCCATTTCAAACCTCAATT  
CTGACATCTCCTGTAGCAGCAGCAGCATGTAGTAGTAATATTGAATTGCAACGAAA

CTCTTCTTTCTTTGATAACAATGCATTCTCATGGGGAGCTGCAGATCATTGTGGTAA  
ATCAGAAAAAGGAGCTAATAATATTCATTCATCAGAAAGTGATACCGAAGACATCA  
AATGGTCTGAATATCTCCATACACAATTTTTACCAGGCAACACAAATATCCACAGTC  
ATCAAACATCGATTCAACACTTATACAGCGAAAAATCAGGCACACAATTCACGACG  
GAAGTTTCATTGAGTACTACACCATGGCTGCCGAACCAGCAGCAACAGCCTTCTAT  
ACAAACTGCAGACTTATATAATAAGCATTTTCAGAGGCTACCAGATGCCTTTGGAC  
AATTTTCTTAG

>Peaxi162Scf00658g00110.1

ATGAATACTACTATTCCCAAGTCGTCTGGACTAGTGAGGAAAGGTGCATGGACTGA  
AGAAGAAGATGTTCTTTTGAGAAAATGTATTGAGAAGTTCGGCGAAGGAAAGTGG  
CATCAAGTTCCTGTAAGAGCTGGTCTGAATAGATGCAGAAAGAGCTGCAGACTTA  
GGTGGTTGAATTATCTAAGGCCACATATAAAGAGAGGTGACTTCTCTCCTGATGAA  
GTGGATCTTATTTTGAGGCTTCATAAGCTTCTAGGCAACAGATGGTCACTTATCGCG  
GGTAGACTTCCGGGAAGAACAGCAAACGATGTCAAAAATTACTGGAACACACACC  
TGCAGAGGAAGTTAATTGCTCCTCCGCGACAAGAGATAAGAAAGTGCAGAGCCCT  
TAAGATCACTGAGAACAACATAGTAAGACCTCGACCTCGGACCTTCTCAAATAATG  
CACAGAATATTTCTTGGTGCAGCAACAAAAGTATCACAAACAGTACTATAGATAAA  
GATGGAAGCAACAATGAATGTATAAGGATTAGTGATAAGAAGCCAATGGCCGAGG  
TGTCAGAGACGATGGAGTTCGATGGTGGACTAGTTTACTAGCTAACTGCAACGA  
AAATGATGAAACAGCAGTTGAGAACATGTCATATGATAAGTTACCGAGTTTGTGTC  
ACGAGGAAATATACCAACGATAAATGGTGGAATTAGCAACTGCATGCAAGAAGG  
AAAAACTGGTTGGGATGACTTCTCTGTTGATATTGATCACCTATGGAATCTACTTAA  
CTAG

>Peaxi162Scf00682g00009.1

ATGGGAAGAGCTCCTTGTTGTGACAAGGCAAATGTGAAGAGAGGACCATGGTCAC  
CTGAAGAAGATGCTAAGCTCAAAGACTTCATTCACAAATATGGTACTGGTGGAAT  
TGGATTGCTCTTCCTCAAAAAGCTGGACTAAAGAGATGTGGGAAGAGTTGTAGAT  
TAAGATGGCTTAATTATCTAAGACCTAACATCAAACATGGTGATTTTTCTGATGAAG  
AAGATAGAATTATCTGCAGCTTGTATTCTACCATTGGAAGCAGATGGTCAATTATAG  
CAGCTCAATTACCAGGAAGAACTGATAATGATATCAAGAATTACTGGAACACTAAG

CTTAAGAAGAACTCATGGGATTAATACCCTCTTCAATTATTCAAAGAAAATCACC  
ATATATGTTTCCACCTACTACTCTTCATGCAACACAAGTCCAACCAAATAATTTGTA  
CACCCCAAATCTTTTCGTACACCAACAATAACATGAATTTTCCTTTAGGTGCTACAAA  
TCATCAATACTCATATAATTTTCAGAGTCATCATCAAGATAGTTTGATAAATCCTATG  
CAAATTTACCCACAATTGAAAGATAATTTACTAATGTTTGGAGGGACTACAGAAGC  
AAGTTGTTTCATCATCAGATGGAAGTTGCAGCCAGTTGAGTTTTGGTCATAAAGAAA  
TCAAGAAAGAGGATATTATTATGGGTAACTTTTCACATGGTCAAATTTCAAGTGTTG  
CATTTGAAGAAAATCAGAATTTTATGAGTTGGGTGATCAAAAACCAAATGGTTAT  
TTTGGGAATAACAATAATCAAAGTGCTGATCAAGTACTACTTCAGTATGATCTTGAT  
CAAGAAGTGAAGCAGCAGCAGCTAACAAGTTGTAGCAATGGCAACAATGGTACTA  
CTACTAGTGAATGTAATAACAACAGTATGTTCTATTACTGA

>Peaxi162Scf00683g00242.1

ATGGATATGAATGGAGCAACTTATATTAGTGTACGATTTTAAATGGGTTTTGAGTGG  
GTTGGATCGGACGCTGATGATGACATCGAGTTGGTTCGTAGTATTCAAGAGCGATT  
CGCTTTATCAACTGAGCTTCGTGAGCCTTTAAGTTTGAAGCCTTTGTACTCGATACA  
TCCACGTGGCGGCTCAGAGTTTGACGATGATGATGATGATGGCGATGATTTTGAAA  
CCCTACGTGCTATTCAGCGCCGCTTTGCTGCTTACACTGACGAGAGAACTAATCCT  
GAGGAAGGGTTTCCCGCTTGTGTAGATCGAACCACACATTTTTCTGAAGGATGCAG  
TTATGACATTGCTGCTAGGTCTCAAACCTCTCATTGAGTGGCATGATGATGACTCTGG  
TGCTGAAAACACAGCCGTGTCAGCTAATTCTTCTAGCTTCCCAAATCAGCACAGG  
CATTTGTTGATGCCATCAAGAAGAATAGGTCTTGTGAGAAAATGATTAGAAACAAG  
ATGATGCAAGTTGAAGCAAGGATGGAAGAGTTGAAAAAATTAAAGGAACGGGTC  
AAGATTCTTAAGAGCTTTCAGCTCACTTGCAGAAAGAGAATGGGGCGGGCTCTGT  
CACAGAAAAGAGATGCACGTGTCCAGTTAATTTCTTTGCCAAAACAGAGGTTTCTAG  
TTCAAAGCTCCAGGGAAAAAAGCTGTCTGCCATACATTATGGACCTCCCGAGAATT  
CTCATGTTGCTAGCTTTAAGGAGGCATTGACAGAGTTTGCTGTCTCATTGAGTCGT  
AAAGAGTGGTCCAAGGAAGAGAGGGAGAACTTGCCAAAGGCGTGAAACAGCA  
ATTTCAAGAGATGTTGCTTCAACACTCAGTTAATTTACGAAGTGATCAGGATGGAT  
GTTCTGGAGAGTCTGGTGATCTTGATGACACTATTGCCTCAATCAGAGATCTTGTG  
AACAAGATTGCCCCCTGAGACCATGAGATTGTTTCTGCCCAAGGTCAATTGGGATCA

AGTAGCTTCCATGTGGCTGAATTGGGAAGACCCATTAATTAAGCATGAAGGCTGGG  
ATACAGTAGAGGAAAAAGCCTTTTGCATGCTGTCCAACAAAAGGAGATGAGTGA  
CTGGATTGGAATTGCTGCATCATTAGGAGTATGTAGGACTCCGTTTCAGTGCTTATC  
ACATTACCAGAGGAGTCTCAACGCTTCAATCATTAGGCGTGACTGGACAGAGGAG  
GAGGATATTAGACTCTGCTCTCTTGTAGAGACTTTTGGTGAGAGTAACTGGCAAGT  
TGTTGCTTCCTTCATGGAAGGCCGGACAGGCACACAGTGCTCCAATAGGTGGATA  
AAATCACTTCATCCAGCAAGGAAGAGGTCTGGTAAATGGAGTGCTGATGAAGACA  
AACGATTGAAAGTTGCTGTGATGCTTTTTTACCCAAAACTTGAGGAATATAGGT  
CAATCTGTGCCTTGGCGAACACCAATTTGGAAGAAGATAGCTCAGTTTGTACCTGG  
GCGGACTCATGTACAATGTAGAGAAAGATGGGTCAATAGCTTAGATCCTTCCTTGA  
AGTTGGATGAATGGACAGAAGAGGAGGATTTGAAGTTAAAATCTGCCATAGATGA  
ACATGGGTATTCCTGGTCTAAGGTTGCTGCTTGCGTTTCCTCCACGTACGGATAACC  
AGTGTCGGAGGAGATGGATGGTGCTATTTCCAGATGAAGTGCCTATGCTGCAAGAA  
GCTAAAAAGATACATAGAGAAGCTTTTATTTCCAACCTTCGTTGACAGGGAGGAGCA  
AAGACCCGCTCTCAAACCAGATGATCTAGTTCCGACCCATAAGCTTAGAGATAAAG  
CTGGATGTGAGACTACTTCTGCAAATAAAAAAAGAAAACGACGGCCAGAGCAG  
GAAGGGAAGATACGACTCCTAGGAGTGATGCAATATGTGAATTGGAGAAGCAGCA  
TTCAGATGGTGAGGAGGGGTTTGAACAGGATTTTCATGATGCTTCAAAAAATAGGA  
GACCTTCTAAGCTGCGTGTTAGAAAGACTCAAATTTTGCACCAAATGATAATGTC  
CCAGATGCTTCTGCTTCCAGTCAGGTTGAGTCTATTATTGGAGATGGCAATAAATGC  
AAGAGGAGGAAGAGAACCCATTTGCTTATGAAGAAAAAGGCTAAAAATGCTGCCC  
TACAAGAAAGTTCATCATCTTTTCCAATCAGTCTTCGTCAATGACGGCTGCTGAA  
GAGGCTGACATTCGAGACAGCAGGAAGACCAATAATATTATGGATGGACGTCATTC  
CATAAGGGAATGTGATAATCAGTTGAAGGCCATAGATAATCGGCCGGAACACAG  
AGGACTGCACGACTCTTGCTTCCTTTATTTCTAAATCTCGTGCAAAGGGGCGTTTG  
TTGTCTTCTGCTAAGGTTGTGAAGCATCCTGAGTTAGGTCAAAGTAAGACTATGGC  
AGACGCAGACAATAACTCTAGTTGCACGACTCTTGCTTCCTTTATTTCTAAATCTCA  
TGCAAAGAGGCGTTCATCGTCTTCTGCTAAGGTTGTGAAGCATCCTGAGTTAGGTC  
AAAGTAAGACTATGGCAGACAATACCTCTAGTTCCATATCTGGTCACGATGGGCTG  
GGGAAGACGATGACGGAAGATTGTACCAGTTCCAATGGGGTAGTGGGGGCTGAAG

TTGGGGACGACATGCCTCTTTCTCTTTTTATGAGCAGAGCTAAGAGAAAACGTAA

>Peaxi162Scf00689g00121.1

ATGGATGATGATTTTAGCATAAACTCTAAAAATTATCTTCAAGATTTTGAGCACCTT  
GATCTTAATTTTTCTATTCCCTACATTCAACAACCCTGATCACAATTTTATGATAGAAA  
CAAATAGTTATGACCCTTTTGATCCATTCTCAAATATTGAAGATGATTAGGAGATT  
TAATTTTTGTTATGAGCGTAAACCATTTGAGGAAAATATTGGAGCAAGTAGTAGCAT  
AGTTGTAAACAATATTCATGGAGCTGATGAATTCTCAATCAACAAGGAGAATTTTAT  
GGATGTCAACATGTACAATGAGAAGTCATTTTCTAGTGTTTGTGTGAAGATGTGA  
AGCCATTGAACTTTGTTGTGCCTGATGAAAGTTCATCATGTGTCACTGCTGATATTA  
ATGGTTCTTGCAAAGAAATTGGTGGAAGAAAGAGTAAGAAGATGAAAAGAAATG  
ATAACAACCTTATCTTCATCAATGAAAAAGCCTAGTAGAGGGAGGAAAAAATCAAA  
ATCCGCCAAAGGACAATGGACGATTGAAGAAGACAGGATTTTGATCCATTAGTAG  
AGAAATTTGGGATTAGAAAATGGTCTCAAATTGCTCAAATGCTCAAAGGGAGGATA  
GGCAAGCAATCTCATGCAGAAGTGGGAAATAAATGGGCAGAAATTGCAAAAAGAC  
TTCCTGGAAGAAGCTGAAAATTCCATTAAGAATCATTGGAATGCAACAAAAAGAAG  
GCAATTTTCAAGAAGAAAATGTCGTACCAAATGGCCAAGGCCAAGTTCTCTCCTTC  
AAAATTATATCAAAAAGTTTGAATTTGGAAAAAGGAAGCAGCAAAAAGAATTTTCAT  
GACACAAACCCTAATGCAAAAGTCATGAAGGTATCAACTAAGCTAGAGCCAGTTG  
ACAATTTTGGCAAGGCAATAGTATTGAGCAAGTTCATGACTATGGTTTCAGTGAA  
GTCCAAGAATTTGCATTGGATGATAAATTGTTTGATGATATTCCTATTGGTCCTTCAA  
ATATGGATGACAATATTGAGAAATTCATGGGTTTGGAGATGATTCCTTATGAATTGT  
CTACATTGGTGCAAGGTGAAGTCAATAAGGAGATTGATTTGATGGAAATGATTTCT  
AGAGTTAATAAGCCATAG

>Peaxi162Scf00700g00732.1

ATGGGGAGGCCTCCTTGTTGTGACAAAACAAATGTGAAAAGAGGTCCTTGGACAG  
CTGAAGAAGATGCAAAAATTCTTGCTTATGTTGCTAGTCATGGAATTGGTAACTGG  
ACTTTGGTCCCTCAAAAAGCAGGTCTCAATAGGTGTGGAAAAAGCTGTAGGCTAA  
GATGGACTAATTATCTGCGTCCTGATCTTAAACATGACAACCTTACTCCTCAAGAAG  
AAGAAATCATTCTTGAATTTACAAAACCGTGGGTAGCAGGTGGTCTTTAATAGCA  
AAGCAACTACCTGGGAGAACAGACAATGATGTGAAAAATTACTGGAACACAAAG

CTAAAGAAAAAGCTAGTGAACATGGGAATTGATCCTGTTACACATAAACCATTTTC  
TCAAGTCTTTGCTGAATATGGAAAAATCTGCAATCTCCCTATTCAAATGCAAGAA  
ATCATATTATTTTGTCCAATAATTCCACTGGCAAAAACCAAGTCTTTCAAGAACCAA  
ATCAATTTCAATTCTCAAATGAAACTCCTCATGATACTATTCAAACACACAGTTTTA  
GTGAAAAGGAGAATCCTAGTTGTGTGCAAGTTACTCAAGCTGAGGAAAAGAAATC  
TGTGGATTCATTTCGTTGATAATATCTTGGCTCGGGACAAGCAAATGCTACTGGATTA  
TCCTCCACTTCTAGATGTATACTTGGATTATTGA

>Peaxi162Scf00714g00029.1

ATGAATCAAGTCCTTTTGAGGATATACTTTGGCTACAAGATCATGATACAAGTTAAG  
GAGGAAGTTCAGACCCTAGACTTTTGTGGATTTGCTTCTTGTTTCATCTTTCTCCGAT  
AGTAGTTACGAGGCTAGCACTTCGAGATACTCCTCTGAGCCTGGTTGTCGCAGGAG  
CTCAGGTCCAACATAACGTTTCATCTCAGGCAGGATGGACAGAAGAAGAGGATTAT  
CTGTTGAGTGAAGTGGTGAAAAGGTACAATGGAAGAACTGGAAAAAATAGCT  
GAGTGCATGAGTGGAAGGACCGATGTGCAGTGCTTGATCGCTGGCAGAAGGTTT  
TGAATCCTGAGCTTGTTAAGGGTCCTTGGACAAAGGAGGAGGATGACGTGATCGT  
CGAGTTAGTTGAGAAATATGGCTGTAAGAAATGGTCTCTTATTGCAAAGTCTTTGC  
CTGGTCGCATTGGCAAGCAATGTCGCGAAAGGTGGCACAACCATCTTGACCCAAC  
AATAAAAAGAGATGCCTGGACTGAACAGGAAGAATCGGTCCTACTCCACTATCAC  
CAAATATACGGGAACAAGTGGGCAGACATTGCGAGGTTTCTGCCTGGAAGGACTG  
ATAATGCAATTAAAAATCATTGGAATTCCTCAGCCAAAAAAGATTGAGCTTGAAT  
ATCCAAAGTGAGGGATCTCCGAATTTCTCAAGTCACGAGAAAAAGCTAGAGATCG  
GGAAGTATTCCTACAGGCTCAAAGCGTAGAACAAACAATATTTTCAGGTGAGCA  
AAAAGGAGTAGATAATGCTGCTGATGCTTGCTCAACTGATTTGACAATTGGATGTA  
CTTATTCTGCACAAAATGCTCTGCGCAAGGATACTTCTTTATTTGGAGCCTGTAAAT  
CATCAGAAGAAAATGTGAGGGACCTTATAAAGCCTCTTGGTGGAATACAATTTGGC  
AAGGCAGAGATTATCCAATTGGCGAGACAGATAAACCATGCCATTCCAATTTAAA  
TCACACTAAAATATTATATCCTCTCTCAACCTCTTCTTTAGAGTTTCCTTTGGATCGG  
TCGCACATCACCAGCTTGAGTAGTTCTCAAGTCGAGGCTGTTTCATCCTGCTTCTTTT  
GGGAGAATGTATGAAACTCCCAAAGGTCTAGGCATGATGTTAATAATCCTGACCA  
AGATTTTTTGAGCTTATCATTGCCTGGCTTTACTGAGGTTTCATTCCCAAGGTAGCAA

GAGGAATAAATCATTGATATGCAATCTTCTTTGGATCTCAATCAGCATGGCTGCCT  
GTATTATGAACCACCACAAGTAAAGGACTTGATGATTCCTTTAACAGATGAAAATC  
TTAGTAGCGATAACATTATCGGGGCAGATCATGGTCCGCCATTTTGCTCTACACCTC  
CTAGTCTTGAATTAACAGTCTCTGGTAATGGTAGCAGCAGTCCAGAATCCATGTTA  
AGGAATTCTGCAATGAGTTACACAAAACTCCTTCAATCATAAGAAAGAAGACTT  
CCAAATTTTCAGAAGCTGTGAGGCATTCTAATTGCACAGGCACCACGACACCCATG  
TATAGTTTCCTTGGTGATCCTGATAGGGGAGACAGCTCAAACCTGAAGGACAGGAT  
ATCTGGATGTAAAACATCAGTTTCGGGAAAATCTCTTGGAAGACGGTTGGAATATG  
CCTTTGATATGGAATGGGATGCTTCTAGATGTCGCACACCAGTTTCTGCAGCTCCAC  
CTTGTGGACTTAATCTTGGTGCTATTGGTGCTAATACAATCCAAATCATACGAATAG  
ATGGTTCTATAAGGGACTTCTTTGACTCATGTCAATTTGAGGCAACGAAGATCAGT  
GAAGCAATGACAATGCTGAGACTCTCGAGTCTTGAATAA

>Peaxi162Scf00753g00338.1

ATGAGCAAAGGCATAGTAATGAATAGTTGCTCACATGAAGATGAATTTGAGCTAAG  
AAGAGGACCATGGACTCTTGAGGAAGATAACCTTCTTATCCATTACATATCTAGTCA  
TGGTGAAGGTCGTTGGAATGCCTTAGCTAAATGTGCTGGGCTAAAGAGAACAGGA  
AAAAGCTGTAGACTTAGGTGGCTAAATTACTTGAAACCTGATATTAAACGTGGAAA  
CCTCACCCCACAAGAACAACCTCTTAATACTTGAACCTCCACTCCAAATGGGGAAAC  
AGGTGGTCAAAGATTGCTCAACATCTACCAGGAAGAACAGATAATGAAATCAAGA  
ACTACTGGAGAACAAGGGTGCAAAAACAAGCACGCCAACTTAAGGTTGATTCAA  
ATAGTAAGAAGTTTGTGGAAGCAATTAAGAGTCTTTGGATGCCTAGATTACTTGAA  
AAAATGGAGCAACAATGTTCCCTCATCAATATCATCCCCTGCTTCTTCCTCCTCAAAA  
ATATCCATTGAAAAACAAAGTTCTTCACTTCCTTCTCCATTAATCAACCATCAAGAA  
CCTTACAAGTCTCATGATAACACATGCAATTATGACAATGAAAAACAAACTCACT  
AGAACATCCAAGAATCTATACATCAAGTTCCATGATTCAAGAAGAGGGGTACCATG  
TGGAGAGTTTCAACCAGCAGCCAGACTTTTCATCTCAAGAAATGTCAATATCAGAA  
TGTGAGATGGGAGAAACCAATTGGTTTACAGATGAAATGGGAGGATCATTATGGAA  
CATGGATGAGTTTTGGCAATTCAGAAAGCTAGGAGATGTAGACATCTAG

>Peaxi162Scf00763g00441.1

ATGGGGCGCCATTCTAGTTTTGTGAAGGAGAACTAAGGAAAGGATTATGGTCAC



CAGAAGAAGATGAAAAATTGTACAATTATATCACCAAATTTGGTGTGGCTGTTGG  
AGTTCAGTCCCTAAGCTAGCTGGTCTACAAAGATGTGGAAAGAGTTGTAGATTGA  
GATGGATAAATTACTTGAGACCTGATCTTAAAAGAGGAATGTTCTCACAGGAAGAA  
GAGGATATGATCATTCTCTCCATCAAGTTCTTGGAAACAGGACAGATAATGAGAT  
AAAGAATTTTTGGAATTCATATTTGAAGAAGAAGCTAATAAAGCAAGGGATTGATC  
CAAATACTCACCAGCCACTAAGTGAAAATCAAGTAAGAAATGAGACAGATTGTAA  
AGATAAGGCCTCAACTTCAACTCAAATACAGCAACCATTTAACCTTAGTAAAAGAA  
ATTTCAACTATGAAGCAAGTAGACAGTTAACAGAAGCTTCAAAAGACCAACTTGT  
GAGTAAACAAGTCTTTGATCCTCTGTTTCTGTATGAATTCCAAGCAAATGTCAATCC  
AAGTGGCTACAATTTGAGACCTTATGACCATAATCAGAACCAAATTGAGGGGAATA  
CAAATTTTGGGTTCTTCTCAATGCCAAGTTTAACAAATTTTGAACAAGGACACATG  
ACAGAAACAGATTTTTCTGAAAGTTCAAGTTCAAGAATGAGTTTATTATATATCAGT  
GAAGCCAAGGAGAGCTCAAGCAACAGCTCAAATATGATTAGCCATCATAATGCTGC  
TGGAATTCAGATGAATGAAATGTTGGAAAATTCTCAAGCTTTGTCATGGGATGTTG  
ATAACAAAATTGATTCTCTGTTTCAGTATCCTTATGATGGGATCAAGAATGAAGAAG  
ATTTTAATAATCCATTGAGTTCCTTATCTGAAGACTTAAGTGGGGAAAATCTTGATG  
TTTTCCACCAAATCTAA

>Peaxi162Scf00777g00521.1

ATGGGTAGACCCCCTTGTTGTGACAAAGTAGGGGTGAAGAAAGGACCATGGACTC  
CTGAAGAAGATATAATGTTGGTGTCTTATGTTCAAGAACATGGTCCAGGGAATTGG  
AGGGCTGTTCCAACCAAAACAGGGTTGAGAAGATGTAGTAAGAGCTGCAGGCTA  
AGATGGACTAACTACCTGAGGCCAGGGATCAAGCGGGGTAACTTTACAGATCAAG  
AGGAGAAGATGATTATCCAACCTCAAGCTCTTTTAGGCAACAAATGGGCAGCCATA  
GCTTCATATCTACCAGAGAGAACAGACAATGACATAAAAAACTATTGGAATACTCA  
TTTAAAGAAAAAGCTGAAAAAAGTTCAAGAACTGGAGATGATCTATTCTCTAGA  
GAAAATGGGTATTTCTCATCTTCAAACCTCAACTTCTAAGGGCCAATGGGAAAGGAC  
ACTTCAAGCTGATATAAATATGGCTAAACAAGCTTTACATAATGCGTTGACCTTGGA  
AAATTTAAGCTCATGTGTTAAACAAGAAAGTCAAGTTTCTACTTATGCATCAAGTA  
CTGAGAATATAGCACGATTGCTAAAAGGATGGATGGGTTCTTCTACAAACAATTCT  
GACTATTCAAAAACTTCATCTAACAACGTTGCGACAGCTGATTCTTCTTCTTGAT

GGGACTCCAAGTGCAGAAAGTGAAATCGGTTTGATGGAATCCTTCAAGTCACTTT  
TTGGGTTCGAGTCATTTGAATCGTCAAGTTCAGATCAATTTTCTCAAACCTGCATCTC  
CTGATGCTAGTAAACTTAAAGGTGAAATCAAGAAGGAAGCAAATGAACAAATGCC  
TTTGTCCGTTATGCTAGAGAATTGGCTGCTTGATGAAAATACAATTCAAGGAAAAG  
ATGATTTGAGTAACTTCTCCTTTGATGAACTAATGACCTTTTTTAG

>Peaxi162Scf00779g00512.1

ATGGGAAGAGCTCCTTGTTGTGACAAAAATGGACTTAAAAAAGGTCCATGGACAC  
CTGAAGAAGATCAAAAGCTCATTGATTACATCAAGGAACATGGTTATGGAAATTGG  
AGGACTCTTCCAAAGAATGCTGGGCTTCAAAGGTGTGGAAAGAGTTGTAGGCTTC  
GTTGGACGAATTATCTAAGGCCAGATATTAAGGGGAAGGTTCTCTTTCGAAGAA  
GAAGAGACAATCATTCAACTCCACAGTGTTTTAGGGAACAAGTGGTCTGCAATTG  
CTGCACGTTTGCCCGGTAGAACTGACAATGAAATCAAAAACCTATTGGAATACACAC  
ATCAGAAAAAGGCTTCTGAGAATGGGGATTGATCCAGTGACTCATAGTCCCCGTCT  
TGATCTCCTTGATATCTCTTCCATTTTAAATTACCCTGCACTCTACAATAATTCGTCT  
CATCATCAAGTGAACCTTTTCAAGATTGTTAGGTCATGTGCAACCTTTGGTAAATCCT  
GAAGTCTTGAGATTAGCTACTTCTCTTTTATCTTCACAACGCCAAAACCTCTAATTTT  
TTGATGCCAAATAATGTTCAAGAAAATCAAATATGCATTTCCCAAGTCCAAAACCA  
AGTGCACCCAATGGTACAAGTTACGAGCCAAGTTCAAAATCCTATTCAAAATATTC  
CGACATGTACCACATTAAGTATTACTCCATCTGTTCCATTTTATGACGAAGCTCGAC  
TCATGGAGCAATTTTCATCAAATCTTGTGAATTCTAGTTCACAAAATTGCCAAGTTA  
ATGAGTGGCAAAGCAGTGGGATGGCCTCAAATTTAACAGATCAAGATTATTTTAAT  
AATCCTTTACAAAATTATGGCTACTATCATGAGCTGGATCAATCTATAAGGGATCCTC  
CACTGTCCGATGCTTCAACATTTCAATCCAACGACAGCAACAACCTTCAGCTTTCAA  
TCTGTTTTGTCAAATTTATCAACACCGTCATCAAGTCCTACACCATTGAATTCCAAC  
TCAACTACTACTGAAGATGAGCGGGATAATAGCTACTGCAGCAACATGTTGAACTT  
CGATAATATTCCAAATATTTGGGATTCTACCAATGAATTCATGTAG

>Peaxi162Scf00786g00439.1

ATGGATCAAAATCTCCATCACCAGCCCAAGATCATGCACCGATGTTGCAGCCATGA  
AGTTGTTTCTTTTGTTTTAATTTGGAAAACAGAAGTTAATAGTATGGAGTGGGAGTT  
CATCAGCATGACTAAGCAAGAAGAAGATCTTATTTACAGAATGCACAAGCTTGTTG

GAGACAGGTGGGGACTAATAGCAGGAAGAATACCAGGGAGAACAGCAGAAGAAA  
TAGAAAGGTTTTGGATAATGAGACACAGTGATGGCTTTGCACACAAGAGACGACA  
ATTGAGAAAAGTGTAG

>Peaxi162Scf00797g00013.1

ATGGGGAAACAACCTTGTTGTGACAACGTTGGACACAATAGGGGTCCTTGGACTG  
TTGAAGAAGATCATAAGCTCACTAACTTCATCCTCAACAATGGTATACAAAAGTGG  
CGCCATGTTCCAAAAGTAGCAGGTCTAGTGAGATGTGGGAAGAGCTGTAGATTAA  
GGTGGATGAATCATCTAAGACCCGATCTTAAAAAAGGAGCATTTACAGAAGATGA  
AGAATATATGCTCATTAAGCTTCAATCTCAACTTGGCAATAGATGGTCCAAAATAGC  
CGCGCATTTTCCAGGGCGAACAGATAATGAGATCAAGAATCATTGGAATACAAGGA  
TCAAGAAGAAGCTATACACAGAACAACTAGAGATATTAAAGAAGGAAGTACTAA  
ACAGAAATATTCTGGACAACAGAGTTTACCTTCTCTTGAGTATTTAGTGAAGGATC  
AACAGCAGCTTAAAGAACCAATAGAGATTTAGAAATGGGGTCAAATGATGTGAA  
CCAAAATTCAGAACCTGTTGAGACAATTTCCATTGAA

>Peaxi162Scf00840g00121.1

ATGGGAAGGACACCTTGTTGTGACAAGAACAAGTGAAAAGGGGGCAATGGTCT  
CCAGATGAAGATGAAATTCTCAAGAATTACCTTCTCAAGCATGGAAGTGGTGGCAA  
TTGGATTACCCTTCCTCTCAGAGCTGGTTCTCTTCTCTCTCTCTCTCGGCACACACG  
TCAAAATTATGTTATATATTATTTAATAATAACCCAAGTTTATGAACTTTTTTTACTAT  
GCAGATGGTCCATTATAGCATCTAAGCTACCAGGAAGAACAGACAATGATGTGAAA  
AATCACTGGAACACTAAGTTGAAAAAGAAGCTACTAGCAAAAAATGCTAACCCCA  
CAAGCAGTTTTGATGAAAGCAATGAAGTTTTTAATACCTCAACACCTAATGCACTT  
CTATTTATGGTACCTAAAGAGGAAGAAAAACAAGCACCCCTATCAATTTCCATTTCC  
AAATATGGACTCTGCTGGGCTCAGTATTAATACCAACAACATTGACCAAAAACATT  
TTCCTATTCCAAGTTTCACTCAAGAAAATTCCAAGAATTCTGGAACATCTTCAGTTT  
CTTTTGATGAGACTAATTGGTTTGAGAAAGGAGCTAATGATTCATTTGAGGGGTTT  
CCATTGGGTTTCAGCACTGATGAGATCATGGATGGTATATGGAGTACTCAACAATCA  
TTATTTGAAGAAATTGATTTCCCATCCACTTTTATCTGA

>Peaxi162Scf00847g00211.1

ATGGGAAGAGCTCCGTGTTGTGACAAAGCAAATGTGAAGAAAGGGCCATGGTCA

CCTGAAGAAGATGCAAACTAAAGGAATATATCGAGAAATCTGGCACTGGAGGCA  
ACTGGATTGCTCTTCCACATAAAGCTGGGCTAAGAAGATGTGGAAAAAGCTGTAG  
ATTAAGATGGCTAAATTATCTTAGACCAAACATTAAACATGGAGAATTCTCAGATGA  
AGAAGACAGAGTCATTTGCACACTTTATGCTAGCATAGGAAGCAGGTGGTCAATAA  
TAGCAGCTCAGTTACCAGGTAGGACTGATAATGATATCAAGAATTATTGGAACACA  
AAGCTCAAGAAGAACTCATGGGACTTGTTTCTACATCTCAGAAAATTAGGCCTCT  
TCATAATCAGCACCAAATTATCACTAATTATAATTACTACCCACAAATTCCATTTAT  
CAAACCTTCATCCTTAGCTTCATCTTCACCATATTCTTCGACAACAACAATTCCATGC  
TATGAAAGTACTATTCTTACACTTGCATCAAGTAGTTTCTTGAATACTGCATCAGCT  
AGTTGTACTTCAGGCATAAGTGGTAGTACTTCAGGCACTGTGCTACAAGTTCAAGA  
AAGTTATGTAGGGGGTCCCACAACCTTCTTCTGATGGGAGTTACACTAATCAGATGA  
GTCAAGGAAGAGATCAATTAGAGTATGATTATGGTGTTCAAATGGTGGAGAAAAT  
TTGGATTTTCATAACTATCTTTATAATAATGGGATTATTGGTCTAGAAGATCAGAGTA  
CTAGTTCCAAGTTCTTGAATATTGAAGCTGCTGATGAAAAGCCAATTATTAATGCAA  
ATAGTTGTTATGTTCAACAAGAACAAAATCCGTTAGACTATAGTTTGGAGGAGATT  
AAGCAGTTAATTAGCACTAATAATGTTACATGTAACAGCAACTTCTTTCTTGATGAA  
AACAAGATAGAAGAAAAAGTCATGATGTACTAT

>Peaxi162Scf00876g00221.1

ATGGGCAGGAAGCCATGTTGTTCTAAAGTTGGCATGAGAAAAGGTGCATGGACTG  
CAGCAGAAGATAGGCTGCTGACTAATTACATTGAGCTAAATGGTGAAGGAACTG  
GAGATCTTTGCCTATGAAAGCTGGCCTTCTTAGATGTGGTAAGAGTTGCAGACTTA  
GATGGGTGAACTATCTTCGACCAGGTATTAAGAGAGGAAATTTAGTCCTGAAGA  
GGATGATCTTATCATCCGTCTTCACACACTCCTTGGTGGTCGATGGTCTCTAATTGC  
TGGAAGATTGTCAGGTAGAACTGATAATGAGATAAAAAATTATTGGAACACCTATC  
TCTTGAAGAACTCAAGGCTGCAGGAATAGAACCAAAAGCTAAAACAAAGAAAT  
ATAGTACAAATACTAGGCAAAACAAAGAAATGAAGCGAAGACGGGCAAAAAATA  
AGACAGATAATCTGCTACATCAGGCTGAAAAGCCCCGGGGCAAGAAGGAAGATTG  
TGAAGTAGTTGAGAAGATCCAAGTGCATCGTCCGAAAGCAATAAGGCTTACAAAG  
GGATATTCTTCTTCTACTTCTTCTTCTTTTCTTCTTCTTCGAGCCAAAGTAGTTGTC  
AAGATAATGCACCCAAATTTAATTTTCCATTGAGTTCTGAAGAAGTTGACAATAAG

AAGGAAGAAAAAATAGAAGACAATGCAATTTATGAGAAGCTTCAATTGTTTGATA  
AATTGCTGAATGGATGTGATATTTCAACCGAGTGCTCAGAGCAGACTAGCAGTTGT  
TGTTACATGCTAGATGAG

>Peaxi162Scf00886g00028.1

ATGGTGAGGGCACCTTGTTGTGAGAAAGTTGGCATAAAGAGAGGAAGATGGACA  
GCTGAAGAAGATGAACTACTGCTCAAGTATATTCAAGCTAATGGAGAAGGCTCATG  
GAGGTCTCTTCCCAAGAATGCTGGTTTATTAAGATGTGGAAAGAGTTGTCGATTAA  
GATGGACGAAC TACTTGAGACCAAATTTGAAGAGAGGGAAATTTACTTCAGAAGA  
AGATGAACTATCTTCAAATTGCAATGCTCCTTGGGAAATAGGTGGTCTTTGATGG  
CAAGTTATTTACCCGGACGAAC TACAACGAGATAAAAACTACTGGAATTCTCAC  
TTACGTAGGAGAATTTATACCTTTGGGATGAAAAAGAAACCCATCAAGACCGCTGC  
AGAGATGCCCAATAAGACAATTGTTGCTGATGGCCTTAATTGTGAATCCTTGAAAA  
AACGCGGCAGAGTAAGCCGATCCAAGGCCAAAAAATACAATAACAATACCACCAC  
CACTACCACAGCCTATATCTCCACTTTAAAACCCAAGTCCTCAGGTGTTGGAGCCG  
GTGGTGGAGCTATATGCTCTGAAGGAGATTCAATTGTTGATGCAGGAATAGGACTA  
GACATCCAACAACATGATGAAGATCATGCAGGATCAGCGATAGGTAAGCCAAGGA  
ATGAGGAAACAGAAGGCACGAACCAAAAACACATCAATGCTACAGCTGAAAAAC  
AAGAAGTGCGCAATGGTATCTTGTCTTTGAGGAACAAGGACAACAAGTACTGGA  
TGAGCATATACTAATTGGACCGCATGAAAAAATGTTGGTGTGAACTGTTTCATC  
TTCAGCAGCCTAACTACTGTTTGCATGATTTTGGTAATCAAGTTAGCTTAAGTGGGG  
TTTTGGAAGTTGACGAGGAGAGTCATGAAAATTGGTGGTCCACTATGAATTCTGAT  
AATTTCTTGGAGGATGAATTATGGGTTGATCAGTGCAGCAGCTTGGACTTGGAATT  
TGGATCCATTGAAGAGTGTGATGACATGTTACTTCCGCTATGGGATGATAATTAA

>Peaxi162Scf00911g00012.1

ATGGGAAGGTCACCTTGCTGTGAGAACTGGGATTGAAGAAAGGGCCATGGACA  
CCTGAAGAAGACCAAAAGCTCATGGCTTGCAATTGAAAAACATGGCTGTGGCAGCT  
GGCGTGCTTTGCCAGCTAAAGCTGGACTTAAGAGGTGTGGAAAGAGCTGCAGATT  
AAGATGGATCAATTATCTAAGACCAGATATTAAGAGAGGAAAGTTCAGTTTGCAAG  
AAGAACAGACCATCATTCAACTTCATGCCCTTCTTGGAACAGGACTGACAATGA  
GATAAAAAATTACTGGAACACACACTTGAGGAAGAGATTGACTAAGATGGGCATT

GATCCAATTACTCATAAACCAAAGACCAACATTTTTGGTTCTTCTCAATTAAGTCAC  
ATGGCTCAGTGGGAAAATGCTCGTCTTGAAGCTGAAGCTAGGCTTGTTTCGTGAATC  
CAAGAAACAAATTTCCAATAACAATATTCATGACTTTGGTTCTTTGGCTAATACTAG  
ATTAGCTCATCATCAACTATTCAATCAGAGATCCAGAATAAACAAACATTGTACCCCT  
TCAAGCAAAAGTACCACCATTTCTTGACGTACTAAAAGTATGGCAAGACTCAAATT  
GGACAAAGCCAAAAATTACCAAAGACACTTCATCATCATCAGTTCTTGATTCTGTT  
TTGACTTCCATGAATAATGGAAGTTTCGATTCTCCAACATCCACGAACAACCTTATTC  
ATGGCACCAAATAATAATATTCCTAGATTAGTAGACAATTCATGTTTGGTTAATGCA  
GGAAGTTTCATGGAAAACCCAGAGGTTGAGATAATTACAAAAGAAGAAGTCCAAA  
CAGATCAAGTCCAGATTAATGATATTTTCATCAATTAATTATATGAGCATAACAGACCA  
ATCTTCAGGATTTCCAAGTTTCATTCAAGGGTTCACGCACTTGGAAAATATTGTTGG  
AAGCTCCGAAGACAATCTTGAAGATAACAAGTACAGTTATTGGAATACCATACTAA  
ATTCTTGACCTCACCTGCTGGTTCACCAGTATTTTAA

>Peaxi162Scf00929g00071.1

ATGGAAGGAAGTAGTTCAACTTGTTTCATCATCATCATCTGAATCTTCACTGTCAGCA  
GGTACTCCTAAAACACCAAGAGATGGAAACAATAACAAACCTGAAAGAATAAAAG  
GTCCATGGAGTGCTGAAGAAGACAAGATATTGACAAGATTTGTTGAGCGTTACGG  
TGCTAAAAACTGGTCCTTAATAAGCAAATACATAAAGGGTCGTTCTGGAAAATCAT  
GTAGGTTACGATGGTGTAATCAGTTAAGTCCAGAAGTGGAACACCGACCATTTTCA  
CCAGCTGAAGATGACACCATTTTAGCAGCTCATGCTAAATATGGAAATAGATGGGC  
TACTATTGCAAGATTACTTCATGGTCGTAAGTATAATGCTGTAAAGAATCATTGGAAT  
TCTACGTAAAAAGAAGGCAACAAATTCGTAATAACGTATCTGTAGTTGAGAGTCC  
AATAATTATTATAAGAAGAAATGATATTATTGTTAATGTTAATAACTGGGATGAAGTT  
GACCCAATGACAACCTTTGTCATTAGCTCCACCGGGTTGTCGGAGAAGAGTTTGCC  
GGTGGAGTTTTGGGATGTAA

>Peaxi162Scf00944g00140.1

ATGGGAAGAGCTCCTTGTTGTGACAAAACCAAAGTTAAGAGAGGGCCATGGTCTC  
CTGATGAAGACAACACTCTCAAGAACTTTGTTGAGAAAAATGGCACTGGTGGTAA  
TTGGATTGCTTTGCCTCAAAAAGCAGATATCAACCATGGAGCCTTCACTGAGGAAG  
AAGATAACATTATTTTAACTCTCTACAGTCAAATTGGAAGCAGGTGGTCTGTAATAG

CTGCAAATCTACAAGGAAGGACAGATAATGATGTGAAGAATCATTGGAATACCAA  
GTTGAAGAAAAAGCTTTTGGCAGCAGCTGAAATCACTAACATTAGCAGCAACTAC  
AACTCTGTTTTGAATCACAATTACTGTGCAACAGAGTCTACTTGTTTTATTTCCAAC  
ACGTTAACAAGTCTTGTGGAACCAAATTTAACTATGTCATCAAACCTGGTTCCAGC  
AATGTTAAATGTAGAAACAAGTTGTCAATTTCCACTACCAGGCCTAATGGAAATTC  
AAGAAAATGGTGCAATTACAACACTTCAAGAAGATGGTAATTATCTTATGGATTTTA  
GCTCTGGGATTTTCATCAACTTACTATGATATATTAAATGGCTTTGATTTTCAAGAGAA  
AGTTATAACAGCTGATCCAAATTGTTCTAGTTCTTCTTGTTCAACTTTGGTCCAGCA  
GCAAGGTTACATTCCTGACATTGATCAATATCCTTTCAAAGGAGTTGAAAATTAG

>Peaxi162Scf00945g00023.1

ATGGATATTATTACAAAGAAAGGTAAACATATTGATCGTGTTAAAGGTCCATGGAGT  
CCTGAAGAAGATGAGTTATTAACACAACCTTGTTAATAAACATGGTCCAAGAACTG  
GTCTTTAATAAGCAAAAGTATTCCCGGTAGATCCGGTAAATCATGCAGGTTACGTTG  
GTGTAATCAGTTATCACCACAAGTTGAACATCGGGCTTTTACTATTGAAGAAGATG  
AACTATTATTCGGGCCCATGCAAGATTTGGTAATAAATGGGCTACTATAGCCCGTT  
TACTTAATGGAAGGACTGATAATGCTATTAAGAATCATTGGAATAGTACTTTGAAGA  
GGAAATGTTCTTCTCTTAGTGCTGATGAAGGTAATCAACTTGCTGATCAAATTTTTC  
AGAATGATAATCAACCACCGTTAAAGCGATCCGTTAGTGCTGGATCTGCTTTACCG  
GTTTCGGGCTTTAATTTTAGCCCGGGGAGCCCGTCGGGCTCCGATAGTGATTGAG  
TTTTCATGTTAGTTCGTCCTCCCAGTGTTGTGTTTTTAAGCCTGTTCTAGAACAGC  
CGGAGTTTTGCCTCCGGGTTTGGCGTGTCCCATGGACACGTCATCCTCTCCGGAGG  
CAGGAGATCCGCCTACTTTGCTTAGTCTTGCGCTACCTGGAGTCGACTCAGCTGAA  
CACTCAGCCGAGTCGACTCAGGTGAAAGCTTTGCTGCTGCCTCAAGCGACGCAGA  
TTCCACCACCACCGCCGCCACTGCAGGCAGTGCCGATTCAGCACGGAGAACAGCA  
AGATAAGGTTTTTCGTGCCGTTTAGCCAGGAGTTGTTGGGAGTTATGCAAGAAATGA  
TAAAAACAGAAGTGAGGAACCTATATGATGGGAATTGAACAACACCACCCTCAGCA  
GCAACGTCAGCAACAACAACAGCAGCAGCAATATCATCAGCAACAAAATCATCAA  
TTGCCTAATGGGATTGGACTTGGATTATGTATACAACAAGCTACTGATGGGTTTCAGG  
AATACAGCTGCTAATCGCATTTAG

>Peaxi162Scf00978g00214.1

ATGACCAGTGAATGCGTTGACAGGATGACTTCAAAAGTTGGCGTGGATTTCGTCAG  
CTGTTGAAGAAGCTAGTGGTGGAGGAAATGCTGGAGGAGGTGTCCCACTGAAAA  
AAGGTCCCTGGACTAAAGCAGAAGATGCAATTTTAGTAGATTACATCACAAGACAT  
GGGGAGGGGAACTGGAGTGCTGTTAGGAAGCATTACAGGACTTGCTCGCTGTGGGA  
AAAGTTGCCGTTTGCGGTGGGCAAATCACCTCAGACCAGATTTAAGGAAAGGTGC  
TTTCACTCCAGAGGAAGAGCGTCTCATAATTGAACTGCATGCTAAGATGGGAAAC  
AAATGGGCACGAATGGCTGCTGAGTTGCCCCGGTCGCACAGATAATGAGATAAAGA  
ACTACTGGAACACCAGAATAAAGAGACAACAGCGTGCAGGCATGCCCATGTACCC  
TCCAGATATTTGCTACCAGGCGTTTCGTGAGAACAAACAAAATAAGGAGCTGGGC  
ACATTCTCGTCTGCAGATTCACATCCTGATTTCTCACCTATTAACAGTTTCGAGATT  
CCAGCTGTGGAATTCAAACTTTGGAACCTCAGCCAGCAACGGTATCCTCCGGCAC  
TTCTTGATATTGCTGCTAATAGCTCTCTTGATATTCCTGCAACTAGCCTGCTGGCCCA  
GGGTCTTAATTTTTCCTGCAATACTCGGTCTTTCCTCTCAACAATGCATCCGTCCAA  
GCGTATACGAGGATTAGAATCTTGGTTTTCTGGTCTAAATGATGATTTTTTCCAAGC  
TTGTCATCAATTTGAAAATGATGGTTCATTGTTTGCTGAATCCTTAGGGTATTCTTCT  
CCTCATACCGATAATCTGATATCTGTTTCATCACCCAGCATTCTCGGGTGTATTTAATG  
GCAGCCATGCCTCTTTAAATGGCAACTCTTCTTCAGAGCCCAAATGGGCTAAGAAG  
CTGGAGCTCCCTTCACTCCAACTCAGATGGCAAGCTGGGGTTCACCTTCCCCACT  
TCCTTCACTAGAGTCCTATGATACTTTGATTAGCTCCCTCCAAGCGAGCATATTGA  
TTCGGGCAGTCTGTCACCTGGGAACAGCGGTCTTTTGGATGCCGTACTTTATGAAT  
CACAAGCATTAGAGCTTCAAAGAATAACTTACATCAGGAGACTTGTGATGTAGTA  
GATGATTCATGTCCTGATGTCCAAGCGACATGGGGAACTCACAGTGGCCCAAATC  
TCCTTTAGGTCATTCTGCTGCATCAGTGTTTAGTGAATACACCCCCATCTTTGGAGG  
TTCATTGCATGAGCCCCGATCGGTAGCGTCACTGTTTGGTGAGAATGGATGCAAGA  
TTAAGCAAGAGGATGTTGACTTAGCTCCCACTGATAGGAACAATGATGTATCAAAC  
CACCAGATCTTTGCTTGGACTGAGTCGTGCTTTGCTCCAAGTGTGTTTGGTCCCACA  
ACAGAATAGGGTCCTTTGCCTAACCCTCCTTCGGTTTGTATCACCACCGTCTGAAA  
GCTGGGCCCAGACACTTCTAGATTTTCCGCCTCCACTGCTACAATCATCCTCACAA  
CCAGCCACTATTTTAAGAAGCTCTGAC

>Peaxi162Scf00986g00227.1



ATGGTACAAGAGGAAATTATAAGAAGAGGTCCATGGACTGAACAAGAAGATTTTC  
AGCTAGTATTTTATGTGAACCTATTTGGTGATCGACGCTGGGATTTTCTGGCGAAAG  
TTTCAGGTTTGAAAAGAACTGGCAAGAGTTGCAGATTACGTTGGGTTAATTACTTG  
AATCCTGGTCTCAAACGTGGCAAAATGACCCCTCAAGAAGAACGCCTTATTCTTGA  
ACTCCATTCCAAATATGGAAATAGATGGTCGAAAATTGCTCGGAAATTACCAGGGC  
GAACCGATAATGAAATAAAGAATTACTGGGAGAACTCACATGAGAAAGCAAGCTCA  
AGATCAAAGGAAAAATGCTTTCATCTCTCCATCTTCATCCTTCTCAAACGTTCATC  
TAATTCCTCTGCCAATAGTCCTGCTGTGGACTCAATTCCCATCACTAAACAAAACA  
AAAGAAACCTGGAACTGCAGAAGAAAAGAAAATATATAATCATGAAGAAGCAG  
AGGAAAACCAGAATATGGTCTACACCATGGATGAAATTTGGAAAAATGTTGAATCA  
TCACAAGAACTGAAACAATGAGTAAATTACCAGTTATGGCTTCACCAATATGGGA  
TTATTGCCCTGATTCATTGTGGATGACTGATTTTAATTACTTTGACAATCAAGATATC  
CCTTTTTTTACTGGCTAA

>Peaxi162Scf01007g00117.1

ATGAGTGAACAAATGGATAGCTGGGGAATGACAAAACAAGGGTGGAGAAAGGGA  
CCTTGGACTTCTGAAGAAGACAGATTACTCATTGAATATGTTAATTTGCATGGGGA  
AGGCAGATGGAATTCTGTTGCTAGGGTTGCAGGGTTGAAAAGGAATGGGAAAAGT  
TGTAGGTTGAGATGGGTGAACTACTTAAGGCCAGACCTAAAAAAGGGACAAATTA  
CTCCTCATGAAGAAAAAATTAATTCTAGAGCTACATGCTAGATATGGGAACAGGTGG  
TCAACTATTGCTAGAACTTGCCAGGGGAGAACTGATAATGAGATCAAGAACTATTG  
GAGGACTCATTTCAGAAAAAAACCAAAAATTCAAGAGACAAATCTGAAAAATC  
AAAGGTGCGTCTAGTGAAACGACAGCAATGGCAGCAACAAAAACAGCAGCAGAA  
ACTGAACACTCAGACTGATAGTAATAGAGTCGTGTCACTCAACAACAAGAAGAAT  
TATTACGCTTCAATCCTAAATAAGCTGGGGAATAAGATCGTGTCAATTGCTTGATAAA  
AATGAGAATAGAATATTACCACTTGTGACTCAAAAAGAAAACCAAGAAATGGCCA  
ATTTATACTCAAATACAGCTGATCAAGAGGAAGATGACTTTCTTAATTCATACTCA  
ATGACTATACTTGTGTATCTTTGTTGGAGTCCTCGTTCAATGAAGATATGATGTGGG  
ATGATTTTTTGAATAAATTTGGATGAATATCAATGCAATGTCAGCACTACTATCTAG

>Peaxi162Scf01010g00010.1

ATGGAAGAGGCGGAGCAGCAGAGCGATTTTAAACTGATTGACGCCGCCGTCAATG

GCGGTGATACCATGGCGGTTGATGAAAACAACGGCGGCGGTGGTGGTGGTGGAAA  
AGTGAAGGGACCGTGGTCACAGGATGAAGACACAGTGTTGAGTGAAGTGGTGAG  
TAAGTTCGGGGCGAGGAATTGGAGTTTGATCGCCCGAGGAATCCGGGTCGTTCT  
GGAAAATCGTGTGCGCTTCGTTGGTGTAAATCAGCTCGACCCTTCTGTAAAGCGCAA  
GCCTTTTACCGAGGAAGAAGACAACATTATAATTCAAGCACATGCAGTGCATGGAA  
ATAGATGGGCCTCGATTGCAAAGTTGCTTCCTGGTAGAACAGATAATGCAATTAAG  
AACCACTGGAAGTCTACATTGAGGCGCCGTTTGCTGGGCTTAAAAGGGTCAACC  
CTAGTCACTTTGAGATGTTAGATAGTAGCAACATTGACAGAGTTAAGGCGACATCT  
GAAGAAACCAGGTCAGGTGATGATCATAATCAATCAAAATCCTTGGAGGGAAGGG  
AAGCAAGCGTCCAGCAATGCAAACGTACCCTGCTTGAAGACAGAGCTCCAGTGA  
GTGAGATGTTTGGCGTTCCTGAGAAAGTCGCACACCTTGTTTCTGGAAGCTGTCAT  
TCCACTATTAATGAAAATAATCCATCTGTTTCTCGCCCAACTGCAAAAGTTGGCGC  
ATTTGATGTGCATAACCTTTCTAGCGCTTCCTTTGCATCTTCAAGAACAGTGCCCAT  
ACAGGGGAATCTACTCCAGGCCTTCTCACCTGACTTTGGTATCTGTAACTTCTTG  
AAGGTCTACCTGATGAACCTATAATACCTTCGAGCTGCGGGCATGGTTGTTGTTCA  
GCTCACAGCAAGAGTTCCTCTGCTAGTTCTTTACTGGGGCCTGAGTTTGTGGAATA  
TGAGGATCTACCCGCTGTCTCTAGCCATGAGTTATTTGCCATGGCCACAGATTTAAA  
CAATATCGCTTGGATCAAAAGTGGACTTGAGAATGCTGGTAAATTACCTGACAAAA  
CCACTAGCGGAAGAGATCATCAAGGTAGTTCTACTTCAACTCCAATGCCAATGCCA  
ATGACAAGCTTTGTCTTGCCAGCTCAAGTTGAAAGCTTGAGCTGA

>Peaxi162Scf01068g00314.1

ATGAGACTATTACGTTTTTGTGTACTTGCTTCTTGTGATTTTCAAGAAATGAAGTTT  
TTAACTCAAACTCTTTGGTTATGGACTATAACAAAGGGAGACACTGTTTGAGTAA  
TGTTTCTACAGATGGTAAAGTACTAGAAAATCCTTGGATATTTCAATCAATGGTGGA  
AGATGAGAACGGAACAAAGTTGAATGTTGAAACAGAGGAAGTAGATTTAGTAGG  
GAGGAAAAATAATGGTGGTACAAAGCTATGTGCTAGAGGTCATTGGAGACCTCATG  
AAGATGCAAAGCTTAAAGAACTTGTTGCTCAATATGGTCCACAAAATTGGAATCTT  
ATTGCTGAAAACTTGAAGGAAGATCAGGGAAAAGCTGCAGATTGAGATGGTTTA  
ATCAACTAGATCCAAGGATTAATAGAAGAGCATTCTCAGAGGAAGAAGAGGAAAG  
ACTATTAACAGCACACAAAATGTATGGCAACAAATGGGCAATGATTGCTAGGCTAT

TCCCTGGCAGGACAGATAATGCAGTCAAGAACCATTGGCACGTTATAATGGCTAGA  
AAACACAGAGAACAAAACAGTGTCTATAGAAGAAGAAAGCCTTCAAACATGCAA  
CAATTTCACTCTATGGGATTCCCTCATGTCTCTGGTTCTGATAATGCTATCCAAAGC  
ATAATTTGAACAGTGATTCAACCATTTCTAGCACCACCAACAACATGGATGAGCA  
CTGTGCTTCTACTTGCCTGATCTTTCACTCACTCCCTCTTCTTCTAAAGTCATTTTC  
ATGAAAAGATTAACATCATATGCAGCATCACCACCACCCACTTCTTGAAGCAAGCAA  
AGGCTTCTCAAGAGATGCACAAGAGGTGAAAATGGAAAGTGGGGTTCACCCAAA  
ATTCTTGCATGGAAAGGAGCCAAGGGCAGACACAGTAGATGCAAGTCATCAATAT  
GGATGTGGTGGGTCAGATACAAACTCAGATATTTAGCATCTGAGTCAGTAGCCAA  
CAACATGACCAATGTTAAGATGTATGGTCAAAATCATGAAAATGTGAAACTAGTAG  
AAAAGCAGATGAAGAGCAAAACTATGCCTGCCTTCATTGATTTTCTTGGGGTTGGA  
GCCACATAA

>Peaxi162Scf01101g00048.1

ATGGGAAGGTCTCCTTGTTGTGATGAAACTGGCCTTAAGAAAGGTCCATGGACTCC  
TGAAGAAGATCAAAAACATCAATTATATCAAAAAACATGGCCATGGTAGCTGGA  
GAGCCCTCCCTAAACTTGCAGGTCTTAATAGATGTGGAAAAAGTTGTAGATTGCGG  
TGGACTAATTATCTTAGGCCTGATATCAAGAGAGGCAAATTTTCTCAAGAAGAAGA  
ACAAACAATTCTCAATCTTCATGCTATTCTTGGCAACAAGTGGTCTGCAATTGCAA  
CTCATCTACCGGGGAGAACTGACAATGAAATCAAGAATTTCTGGAACACTCATCTA  
AAAAAGAAGTTGATTCAGATGGGGTATGATCCAATGACTCATCGACCTCGAACCGA  
TATATTTAACAGCTTGCCTCATCTTATAGCTTTGGCAAATTTGAAGGAGTTAGTGGA  
ACAATCAGAAGTGGCTAGGATCAAATATTTGCAATACCTTCTTCAACCTTCAATGG  
CAGCTAATTTAGCAAACAGCATGAGTACTAGTAACACTTGTAGTGTGGCAAATATC  
TCAGATATGGAAGCTTACAATAATCTTTTAAACATAGGCACGAACCATTTGGAAAAT  
TCCACAAACAACATTCCACCACCTTCGACTACTCTTCAAGCTATTCAAGATTCAAT  
CACTTTCTCACATTTGCCTGAATTACAAGCTACACCAAATTGTAACCTTCCAAAATTC  
TTTGAACGAAGAAAATATGGTTCAAACCCATGTTATTAGCCAAGGTGAAAATACAC  
CTACTTCACCATGGCAGCTTCCTTCTTCTTTATCTCCACCAGAAAATGATAATCAGC  
CTATTAATTCCTACATTAATAATATTGGGGGTAGTTGTAATCCTCCTTTCTTTGGAGG  
AGCACATCCATCAGTTTGGCCTGAGATTCTCCTTGAGGACTCTTTGTTCCAGGATAT

TGCTTAG

>Peaxi162Scf01194g00013.1

ATGGATCATCAACATGCTAAAGTTGATTTGAGATCAAAAGAAGCAGCTTGTAGTAC  
TAACAATATTATTCAAAAAGTTGAGGAAGATGATATGGACTTCAAGAGAGGTTTCAT  
GGACAGTTGAAGAAGATTTTACCCTTATTAATCACATCGCTCTCCATGGTGAAGGT  
CGTTGGAATTCTCTCGCTCGTTCTTCAGGTTTGAAAAGAACGGGGAAAAGCTGTA  
GGTTAAGATGGCTTAATTATCTTCGACCTGATGTTTCGACGTGGAAATATTACTCTTG  
AAGAACAACCTCTTGATTCTTGAACCTTCATTCTCGTTGGGGCAATAGGTGGTCGAAA  
ATTGCCCAGCATTTGCCAGGAAGAACAGATAACGAGATTAAGAATTACTGGAGAA  
CTCGAGTTCAAAAGCATGCCAAACAGCTCAAATGTGATGTCAATAGCAAACAATTC  
AAAGATACACTGCGTTATCTATGGATGCCAAGGCTAGTTGAGAGAATTCAAGCTTC  
TAATTCAAGCAAAAATCAAGTGATTCAACAAACAAGTAACAATAACATTAGTAACA  
ATATTATTCCAAGCATGAGCTTCACACAGGAGAATTCTAGTACGACAACCTTCATCA  
GAAAATTCACCTTGGGACACAAGTAATTCACAAGTTTCAGACACGTCCGATTGTTG  
CTACAATTACAGTACCATTAATCAAAGTGATACACTATGTTATGGAGAATCCTTGAC  
TAGTCCAACAGGTTATTTTCATCAAGAAGGTGCACTTGACTTCAGAACAGTGGATA  
TTGATGACAATCAACAAACCAACCAATTTTTGGATGTTTCAGACAATTTGTGGAAC  
ATTGAAGACATGTGGTTCTTACAGGAGCAACTCAATTAA

>Peaxi162Scf01210g00002.1

ATGAATACTTCTGTTTTTACGTCGTCGGGGGTACTGAGGAAAGGAGCATGGGCTGA  
AGAAGAAGATATTCTCTTAAGAAAATGTATTGAGAAGTACGGGGAAGGAAAGTGG  
CATCAAGTTCCTGTTAGAGCTGGTTTAAATAGATGCAGGAAGAGCTGCAGGCTAAG  
GTGGTTGAATTATCTGAGACCACATATAAAGAGAGGTGACTTTTGTCCGGAGGAAG  
TGGACCTTATTCAGAGGCTTCATAAGCTTCTCGGCAACAGGTGGTCACTTATTGCC  
GGGAGACTTCCGGGAAGAACGGCAAACGATGTGAAAACTACTGGAATACTCAC  
CTTCTAAGGAGGTCAAACCTTTGCTTCTCCTCCCCAGCAACACGAAAGGAAATGTA  
CTAAAGAAATTAGGACCATGGCCAAGAATGCCATAATAAGACCTCAACCTCGGAAT  
CTCTCAAATTAGCAAAGAATAACGTCTCAAACCACAGTACTATACACAAGGATGA  
ATATAGCAAACAGAAAATGTTTCATCGAGAAGCCAACAATGGCCGAAGTCGTGTCG  
AGAGATAACAACGTTGAATGGTGGACGAATTTATTACTGGATAACTGCAACGGATT

TGAAAAGGCAGCACCTGAAAGCTCTTCAACATTTAAGAACATAGAAAGTTTGTTA  
AACGAAGAAGTATTATCAGCATCGATAAATGGTGGAACCAACTATCCCATGCAAGA  
AACTGGAGACATGGGTTGGAGTGACTTTTGTATTGATTCTGACCCCTGGGAATTGC  
TACTCCAATGA

>Peaxi162Scf01221g00042.1

ATGGGAAGGTCACCTTGTTGTGAGAAAGCACATACAAATAAAGGAGCATGGACTA  
AAGAAGAAGATGAAAGACTTATAGCTTATATTAAAGCTCATGGTGAAGGTTGTTGG  
AGGTCACTTCCTAAGGCTGCTGGGCTTTTGC GTTGTGGCAAAAGTTGCCGTCTCCG  
TTGGATTAATTACTTAAGGCCTGACCTCAAACGTGGTAATTTTACTGAAGATGAAG  
ATGAACTCATTATCAAACCTCCACAGCCTCCTCGGTAACAAGTGGTCACTTATAGCT  
GGAAGACTACCGGGAAGAACAGATAATGAGATAAAGAATTATTGGAATACTCATAT  
ACGAAGGAAACTACTGAGTCGTGGTATTGATCCTTCTACACACAGGATCATGAACG  
AGCCTAGCACACAAAAAGTCACAACAATTTCTTTTGCTGCTGGAAATGAAGATATT  
AAAGATCAGAAGATCAGCATTAAAGCAGAATTTGAACAAATCAAGGACGATGAAA  
TTATTAGCAAACCAATTAAAGAACAGTGTCTTGATTGGAATCTTGAGCTCAAAATT  
AGCCCTCCTTACCAACAACATAGTGACAGGGCATTGCAACAGAGTACTACTGGTTC  
AGGGGGGGCTAGTACTATATGTTTTACATGCAGTTTGGGTTTAAAAACAATAAAG  
GTTGCAGTTGTAGCAGGAATAGAAGTATGAATGTTGCTGGTTATGACTTTCTAGGAT  
TAAAGACTAACGGTTTGGACTACAGAACATTGGAAACTAGGACTAAGTGA

>Peaxi162Scf01251g00013.1

ATGGGTAGAACTCCATGCTGTGAGAACTAGGGTTGAATAGAGGTCCATGGAGTA  
AGAAAGAAGATGATATACTCATAAATTACATTGATAAACACGGCCACCCTAACTGG  
CGTCAACTTCCCAAACCTTGACAGCATTCACGTGGTCTGTAATAGCAGCAAAATTACC  
AGGACGAACAGACAACGAAATAAAAAACATTTGGCATACTCGTCTGAAGAAGAA  
AATGAATCAGTCTCAGATTCAAGAGAAAACACCAGACATACGAGAACAACCAAGT  
GAAACATCAAATCCGAGGATTCAACAAATATACAAGAAAATACTGAAATATCAAG  
TCCTAAACCAAATTCCAATAATCAACACGAACCAAGTTCATCGTTACGTTTCATCGT  
CTTCAATAACATCATCAAGTGAAGGTTTCATGTTCAAACACAACCACAACGAGTTCA  
CATATTGACGAGTCTCGAGACCAAATGAACTTGGAGAATTTGCTTGAAGTTGACGA  
CAATTTTTGGTCAGAAGTACTATGGGCAACACCTGCAGATGATTCTAAGGACAATA

ATCTTGATTTTTCATTATCTTCAGTGGAGAAAAATTACGAGCTTGACTCCAGCTTGA  
ATGATAACTGGTTATGGGATGATCTCTTTTCAAGAGCCAACGAGTTTTTGCTAGAAT  
TCCCTGAATTAGTATGA

>Peaxi162Scf01256g00017.1

ATGGGAAGGCCACCTTGTTGTGATAAAATTGGTGTCAAAAAAGGACCATGGACAC  
CAGAAGAGGACATCATTTTAGTTTCATACATTCAAGAACATGGTCCTGGTAACTGG  
AGAGCTGTTCTACTAATACTGGATTGCTTAGATGCAGTAAGAGTTGTAGACTTAG  
ATGGACTAACTATCTCCGTCCAGGCATCAAACGTGGCAACTTTACTGAACATGAAG  
AGAAGATGATTATTCACCTCCAAGCTCTTCTTGGAACCGATGGGCAGCTATTGCT  
TCATATCTTCCACAAAGAACAGACAATGACATAAAAAATTATTGGAATACTCATTTG  
CAAAGAAGCTTAAGAAGCTTCAAGGTCATGATGATCAGAATAATCAAAGGGGAA  
AATCTCAATCAATCTCAAAGGGACAATGGGAGAGAAGACTTCAAACAGACATCCA  
CACAGCCAAACAAGCTCTTGTTGATGCTTTGTCCCTTGACAAAAAACTACTAATG  
TTGTTTCACCAAATATTAATTCTAGTGCTAATTCTCTTCCTGTTGGTCAAACATCTTC  
CTATGCATCTAGTGCTGAGAACATATCTCGATTGCTTCAAAATTGGATGAAAACTC  
TCCTAAATCATCTCAAACCACATCTAATTCCACCACCAGTCAAAGTTCTTTTAACAA  
TTTATCAATGGTTTCGAGTTCGAGTCCTAGTGAAGTGACCATGAGTGCAACAACAC  
CAGAGGGATTAGACTCACTCTTTAGCTTCAATTCATCCTATAATAATTCTGATGTTTC  
ACAATCCATGTTGACCGACGAGGTTGTCGCTGGAATTTTCCAAGATGGAAGCAAA  
CAAACCTGGCAAAATTTCAAGGATGAAAGTGGAATTTTCCAAAAGGGAAGCAAA  
CAAATATGGAGACACAAGTTCCACTAACTTTGCTTGAAAATTGGTTGTTTGATGA  
TGCTAATGCACAAACGCAAGAAGAGCTAATGGGAATTGGAGTAGGCATGGAATGG  
CCTTGA

>Peaxi162Scf01302g00033.1

ATGGAAATTCATTCTCTTGAAATTCTAGAACTTCCAATCCCGTAGAGGGTGGCAG  
TTACGGCGGCGACAGCGGCGGTGAAGATGAGATGTTAGAGAATGAAAGTGGAAG  
CAGTGAAAATGTTGTAAAAAAGAATAAAAGAACAAGTGGAGAAAGAGTAAAAGG  
ACCATGGTCACCTGAAGAAGATGCAATACTAAGTAAATTAGTTAGTAATTTTGGAG  
CAAGAAATTGGAGTTTAATTGCCCCGTGGTATTCCAGGTAGATCCGGTAAATCTTGTC  
GTTTAAGATGGTGTAATCAGCTTGATCCTTCTGTAAACGCAAACCCTTTTCAGATG

AAGAGGACCGACTTATTCTTCAGGCCCATGCTATTCATGGGAACAAATGGGCATCA  
ATTGCAAGGCTTTTGCCAGGTAGAACAGATAATGCAATTAAAAATCATTGGAATTC  
AACCTTGAGGCGCCGGCACAAACGGTAAGTTAAGAAGTGACCCCAGCAATGTTCTG  
GAGGATGTTAGTGCCGAAAAATCAAAAGCATCGTCAGAGGAACTCAATCATGTG  
GAGATGTTAATTCTTTGAAGGCTATTGAAGGAAAAGATGTCAGCTCTCAGGAAAAT  
CAAGAAGATAATCACCATGAAGATAAGAGTGAAGCAGAAGTTCAACGGAGTGATG  
CAGCAAATGATCCTCCTACTCTTGTCCGTCCTGTGGCTCGTATAAGTGCTTTTAGCG  
TGTATGGTTCTTTGGATGTCCAGAAAGCCCAAATACAAACTCCAAGGCTAACTCCT  
GTACAAGCACCGGATCTTGGGATAAGCAAATTGCTTGAAGGATGTTTCACTGACAG  
ATTAGTCCCACACCAATGCGGCCATGGCTGTTGTGGCAATGCCAGTCAGGAAAAC  
AACGGAAGTTCCTGCTGGGACCTGAGTTTGTGACTATGCTGAGCCTCCATCCTT  
CTCAAGCCATGAGTTGGCCGCATTAGCCACAGAGATAAGCAATGTTGCTTGGTGTA  
AAAGTGGGTTGGAGAACAGCAACATTGAGGTTATCTGCAATCCAACAACCAGGGC  
AACATCTGGTACCTCTCTCTTGCCAAACAGACCATTCTAA

>Peaxi162Scf01314g00012.1

ATGGGGAGAGCTCCTTGTGTGACAGAAGTAGTGTCAAGAAAGGGCCATGGTCAC  
CTGAAGAGGATGCTAAGTTGAAGGCATATATTGAGCAGAATGGTACTGGTGGGAAT  
TGGATTGCTTTGCCTCAAAAAATCGGGCTTAAGAGATGTGGAAAGAGTTGTAGGTT  
AAGATGGTTAAATTATTTGCGACCAAACGTCAAGCATGGAGGGTTCTCAGAAGAA  
GAAGATAGGATCATTTGCAGCCTCTACATCATTTTGCAGCCAATACCTTATTCAGAT  
TATGAACCGCGATTGAATGGCGCTTCAATCAGAAAACCTATTAATAAAGCTTGGAGG  
TAAATTTTCAGAAGATGATCAACCGATAAGTGGAGAACAAAGATCCTCAATATCCTAT  
GAATAATTCAATTATTTGATGCATTCGATATATGAGAATCCCATCAATTTGATATCTT  
CTCCATTAGATGTCTTAAATGCTCAATACAACATGAATCATGGGACAGCTTTGACTA  
CAAGTCCATTACAAGGCAATTTTACAGCTGAACGTATGATTTGCAATATTAATTCAC  
AAAAATTGGGGGATCTTGAATTTTTTATATGA

>Peaxi162Scf01390g00030.1

ATGTGCACAAGTGGCATCACAGGTTTGCATAAGGGTGCTTTGATAACTCTTGGCAG  
CATTGTAGCCATTGCAGCTGGTTTTATGACTGTGATTACAAAACCTTGAAAATAGTGA  
TGTCTGTTTGGCTTACCTCCCTTTTGCTCATGTTTTTGAGCTGGCTACTGAAACTGT

AATTCTAACTGTACGCATTCAGGGTTACGTTTCGGATGGTACTGTTAAGAAGGTTG  
AGACGAAGGGAGTTTCTGCCAAGAATCGAATAGAAACCAAATTTGGTGCCGTTCT  
AGAAGACACAACTGATATAACCGAGAGAAGCATGGTAATAGGAGATGAGAAGGTA  
GGTATACCCCGGAAGGAGAAGAAGAAATCCAAGAAAAACAATAAGAATGCTGATA  
TCAGTGGTCTAGGAATGACAATGGCTGATGCTGCAGAAACCAGGAAAGATAGTGT  
TAAGGCAGAAAGTGAACTAAGCCAACAGGAGGTAGTGTTAATCATGACATCAAG  
AAAAAGAAAAAGAAAAAGAGAGAGGATGGAACACATCCTGATAAGTCCAATAAA  
GACAGTGATGAAAGTGCTGCAAAATGCGTTGAAAAAAAGAAACACAAAAAGTTG  
AAGAGAAGCCACCAGGATGAGCAGCAGATAATTCTTGACGCTCCTATAAACACAA  
AGAGCGTCGCTTATGCAAGTGCAAGGGAAAGGGGGGACAGTGAGAACGTTATTA  
AGATACTCGGTGAGGTCTCTGGTGGGAACGCTGTGGAGGAGATTAGGAGGAAAA  
AGAAATCCAAGAAAAGCAATAAACATGCTGTTGAGGGTGATTAAAGTTCAGAGGA  
AAAGAAGCTGTGTGTTGTGAAGGGAAAGAAAGAAAGGGATAAGGTCAATATGGA  
AACTAAAGCAGCAGGAGAGAGTGACGTTTGTGATGTCAAGAAAAACAAAGAAAG  
AGAAGGCGAGAAACATCCTGGCAAGTCCACTAAAGACAGTGACAAGGATGATTTG  
GGAAGTGTTGAAAAAAAGAAAAGTAAAAAGTTGAAGAAAAGCTGCCGCGATGAG  
TCTGAGACAATGCATGGTATTGAGGACGAACAGGAAGCTATTGTGGCTAAAGTCA  
ATCGAGGTGATATTTCTTCAACTGTGGAAGAGATAGAAGAACAGAGCAGAACGGA  
TACTGGTAAAATCAGAAAGAAGAAAAAGGCAACAATAGGACACAGTTCTGAAGA  
TCCTACACATGAAAAGAGTGAAAAGAAAGTGAGATTCTCTGGTCATGTTGAGATT  
TTCCTTCATCCAGTGATCCAAGTGATGAGAAGCATGAACTGAGGAAGAAAATTTA  
CTGCGTGGCAAACGATTCTCAACATTAGAAGATGAAATTGTCAAAGAAGCTGTTC  
ATAAATACATAGAGATGCATAACTTGGGCGAAGAAGGGCTGGAAATGATTTTAAAT  
TCTAGATCTCATCCTGAATTAAAGGGTTGCTGGAAAGAAATAGGGAGCGCTATACC  
GTACAGGCCTTATACTGCGATTTATTATCGTGCACAGGTCTTGTTTCGAAGAAGTGA  
GAAGCGTAAATGGACTGAAGAAGAGTATGAGATGGTACGAAAATACCATGAAGTA  
CATGGGAACAAGTGGAAGGACTTGGCTGATGAACTTGGAAAACATCGGTTTCACG  
TGAAGGATACATGGCGAAGACTAAAATTGACCAATCGGAACAAAGGGCAATGGAC  
TCAGGAGGAGTACCAGACTTTGTTTGATTTAGTAAACACTGATCTGAGACTGAAGC  
TCTCTGAAGAGAAGAAATCTAAGCATGGTATGTTACGGGATAATATTGCCTGGACT



GCAATAAGTGGCAACTTGTCCACAAGAACTGATGCAAATTGTTGCTTGAAATGGTA  
TGACCAATTAACATCACCCATGGTATCCAAAGGTGAGTGGGCGGATACTGATGACT  
ATCGCCTTATTGATGCATTATTTGAGCTAGATGCCAGCTGCATAGAGGACGTAGATT  
GGGACAATCTTGTTGACCACAGGCCTGGAGAGATATGCCGAAAGAGATGGAACCA  
AATGGTTCTTCACATAGGTCAATATGTAAACAAGTCATTTTCTGAACAAGTAGAAG  
TTCTAGCTAAGAGATACCGTCCGGAGTTGGTTGAAGTAAGAGAGGCTTGGGATAG  
TAAACCAATTGTATACTATTGCCGAAGCAAAGCTGGAAATGCTAGTGGAGGATCAG  
ACATTATTGAAGAGTTAACTGTTGATCAAGAGATCAATCAAAGTCAACTGAAACT  
CGAGATGAAGGTTTTGACAGTGTGTTGTTAACAAAACATAAACAGAAAAATGTCA  
CAGAATCAACCAAGCTATGGCCATCAGCAGCTATCTCATCGAGTGGCAAGGACAA  
CAACTGCAGTCACAGTGAGTGGTTGACTCATAGTGCTTTGCGGATTAACGCTGGTG  
GCCACCGTTATCTGCCTAGTTGTAGCCACCCCTTTGTTGCTGATGTTGAGCCCTCTT  
CTTGTCCAGCCATGATATCCATTTTCTTGATCCTTGCAGGGTTCTTGGCTTCTGGAG  
GTTTTGGTGCTACTGCTACTTTTATCCTAATCAAGCCCTCGTTTGCAAGGTTGGTGA  
AGAACTAA

>Peaxi162Scf01464g00024.1

ATGGGGTGCAAGATAGTTGAAAAGACAAAGCAAAAACACAAGAAGGGATTATGG  
TCCCCTGATGAAGATGACAAACTCAGAAACTATATCATCAATCATGGTCATGGCTG  
CTGGAGCTCTGTCCCCATTAATGCTGGCTTGCAAAGAAATGGGAAAAGTTGCAGAT  
TGAGGTGGATTAATTACTTAAGGCCTGGGCTAAAGCGAGGGGCATTTAGCTTAGAA  
GAGGAAGACACAATCTTGACCCTTCATGCCATGTTTGGCAACAAGTGGTCTCAAAT  
TGCACAGCACTTGCCTGGAAGGACAGATAATGAGATAAAGAACCACTGGCACTCT  
TATCTAAAGAAGAGAGTGGCCAAGAATGCAGAAAATGAAAGCCAAACTCAATCTG  
GAAATCGCGAATCATTGCTATTTTCTAAGAAGTGGACGCCCCAAAATTCTAGTTTG  
GATTCATTTGAACACATAGAAGGATCATTAGCAGATTCAGATCAATCTGGTTCGCA  
GGTGGACTTTCCAAAAGAGCATCAAAAAAGTAATTTGCCCAAAGTATTATTTGCTG  
AGTGGCTTTGTTTAGATAAATTTTCATGGTCAAGATTTCCAGAACTCAGGGACTTTT  
GATCTTACCAAGAATAACTTTGGGTATAATAACTCGGAGTCGCAACACGCCTTCAT  
GCATGGTTTACTGATGAATGAAGGTAGCTATGGGAGTTGCATGAATCAAGAAGTTA  
ACAATGGAACAGTAGATGATATGTTTCAACCCCAACTCAAGTTTGAGGATTCAATG

TCTGCAAATGGATTTGAGGACTTTATGTCTGGGGGAATTCATAAACACTGATGTTATG  
TACATATGA

>Peaxi162Scf01819g00004.1

ATGGAAGGTGGTAGTGGAGGAGATGGAAGTGCTTATCAACCATAACCAGAATATACC  
AACTAACCTTTCTATTTTCAACAAGGTCCTCCTTTAATAGCCATTAATAGGTACTTA  
TTGAGTCATCAAAGCCAATTTTCTTCGCAACAAAGTGTAACAACCAGAGCATT  
CTCTCAATGTGGTGGTTTATGTGATTTTTCGTCTTATAGTGGTATTAGTCATGCAAAT  
GGGATTTCTTGGTCAAGTGTGCCCCGAGCCAAGCTTCGTAGATAGAATTTTCTCAG  
TCACGAACAAAATGGTCTCCATTGGAATAATCAAGAGAATGGCATAGCAGAAGAG  
ATGATATCATCTCAGCAGAATTCAAAGGAGGCCGAAAAAAGCGAAGGAAGGG  
CCTTCCTCTACTACTGTACTGGTCAAGGGTCAGTGGACGGAGGAAGAAGACAGGA  
AATTAGTGAAGCTGGTAAAGCAGTTTGAATGAGGAGATGGGCTCAGATAGCTGA  
GAATATGGTCGGTAGAGCAGGAAAGCAATGTCGCGAGAGATGGCATAACCATTG  
CGTCCAGATATCAAGAAAGATGCATGGAGTGAACAAGAAGAACTAATCTTAGTGG  
AAGCTCACCAGCAAATTGGAAACAAATGGGCAGAGATTGCTAAGAAAATTCCTGG  
AAGAACTGAAAATTCAATCAAGAATCACTGGAATGCCACTAAAAGAAGGCAACAT  
TCGAGGAGAAACAAATTTAAGAAACAGGAAAAAGATGGCCAAAATGATTCCAAG  
TATCGATCTAACATTCTTCGAGATTATATAAGGAGCAAGTACTTCAGTGACAATTCT  
CCTCCCACTGCCAGTACTCCAAGTAATAGTATCAGCACCAACGCAACCCACCTTA  
TTCCGATGATGACTCCCCATCTTTGCTCACTCGTCAAACATATGATGAAGAAATGAA  
CTTCATGCAAAATTTATTTGGGGAGAACTCATTGGTGGAAAATAATGGTAAAGTTG  
CGGAGGCAATGGAAGCAAAAACAAGGCAATGTCCTTTTGACAATAAGTCATCATC  
TAGCTCATGCCCTTTCAACTCCTTGGTAGCGGGATATACAAAGAGTGATAATCAGAT  
AGTTAACGACAACAGTGAATATGGCTATAACATGTACATGGCTGACCATTATTCTAA  
AGTGACTCAGCAGTCTGATTCAGACCAGTGTTCTGGAATTTATCTTTCCTACCTCCT  
TGATCATTCTACATCAGCTAATTCTTTGCCTTGTTCTGGGAGCATAGGATATGGAAA  
CATGAATGCGGGCACTCTGGTGAATCAAGGTTCCCTCCTCATCGAAAGGAAACAAA  
GAAGTTGATTTGATGGAGATCGTTTCATCTACTCTCTACCGTCAACAAACGTCTCAT  
ACTACTTTTTTTAATTAA

>Peaxi162Scf01969g00021.1

ATGAGGTGCAAGCCAGTAGAAAGTCCAAAGAAAAACACAGGAAGGGACTGTGG  
TCTCCAGATGAAGACCACAAGCTCAAAAACCTACATTCTTGAGCATGGCCATGGCTG  
CTGGAGCTCTGTCCCCATAAATGCTGGCTTGCAAAGGAATGGGAAGAGTTGCAGA  
TTGAGGTGGATTAATTATTTAAGGCCTGGCCTAAAACGAGGGGCATTTAGCATAGA  
AGAGGAGGAGACAATTATGACCCTTCATGGCATGATAGGCAACAAGTGGTCTCAG  
ATGGCACAACATTTGCCTGGACGGACAGATAATGAAATTAAGAACCATTGGCACTC  
TTATTTAAAGAAGAGAGTTGCCAAAATTGCAGAAAATGAAGCCAAGAGCCAAAAT  
ATGGATGGACTATCTTCATCTTCCTTGAAATTGACTTCGCGAAATTCTAGTTTGGAT  
TCGTTTGCACAAATAGAAGGATCATTAACAGATACAGATCAATCTATTTACAAATA  
GAATTCTTAAAAGAACCTCGCGAAAGTAATTTTCAGAAAGTATTATTCGCTGAGTG  
GTTTACGTTAGATCAATTTAAAAGCCAAGATTTTCAGAATTCAGGCAATTCAAATC  
ATTCCAGGAATAATAACTTTGGCTACAATAAATCAGATTTCCAAGATGGTTTCATTC  
ATGGCTTATTTATGAGTGAAGGTACTTATGGGGCTGACATAAATATTCCAGGGGTAC  
TCAACAATGAAACAGTAGATGATATGTTTCAAGCATCACAATTCAAGTTTGAAGAT  
CATATGTCTGCAAATGGATTTGAAGAATTTATATCTGATGAATTCAACATTACCGAA  
GATGTGATGTACATATGA

>Peaxi162Scf03779g00019.1

ATGAGAAAGGCTTGCTGTGATAACAAGGAGGAAATGCATAGAGGAGCTTGGTCTA  
AGCAAGAAGACCAGAAGCTCATTGATTATATCACTAAGCATGGCGCAGGTTGCTGG  
CGAAATTTACCTAAAGCTGCCGGTCTGCTTCGTTGCGGTAAAAGTTGCAGGCTAAG  
ATGGATGAATTATCTTAGCCCAAACCTTAAAAGAGGAAATTTTCTGAGGATGAAG  
AGGATCTCATCATCAAGCTTCATGCCCTACTTGGCAACAGGTGGTCTCTAATAGCG  
GGTAGATTGCCAGGGCGCACTGATAATGAAGTGAAGAACTATTGGAATTCCCATT  
GAGAAGAAAACCTATAAAAATGGGAATTGATCCAAAGAATCATAGGATATCTCATT  
ATCTTCATAGGAAAAGACTTGAGTATTGGTCAGAAAATAGCAGCAGAGGAACCGA  
TCATGAAGTGGTCTCTGATGCTGGAAGTTCTTGTGCAAAACATCAACCAAGTTCTC  
TGCCTGATCTCAATTCCCCTCCTTCAATTCACAGTTCTTGTGCACAACCGTAG

>Peaxi162Scf03974g00003.1

ATGGGAAGAATCCCATGTTGCGAAAAAGAGAACGTCAAGAGGGGGCAATGGACT  
CCTGAGGAAGACCACAAACTTTCATCTTACATTGCACAACATGGAACTCGTAACTG

GCGTCTCATTCTAAGCATGCTGGTCTACAAAGATGTGGAAAGAGCTGCAGATTAC  
GATGGACAAATTATCTCCGGCCTGATCTCAAACATGGCCAGTTTTTCAGAGGCAGAA  
GAGCAGACCATTGTCACACTTCACTCCGTTCTTGGCAATCGATGGTCTGTTATTGCT  
GCTCAGCTGCCGGGCGGTACTGACAATGATGTTAAGAACCATTGGAACACCAAGC  
TCAAAAAGAAGCTATCTGGGATGGGAATTGACCCAGTAACGCACAAGCCATTCTC  
TCACCTGATAAGTGAGATTGCTACCAATTTGGCTCCACCACAAGTTCCTCATCTAG  
CAGAAGCAGCCCTCGGATGCTTCAAGGATGAAATGCTACATCTTCTCACAAAAA  
ACGCATCGGCTTCCAGTTTCAGCAATTTGGAACCAGTACGGCCCCAAGTACCAGTA  
CTGTCAAAGTTGAGGATAATAAAGAAGAAACAATTGAGAAAATCAAGTATGGATT  
ATCAAGGGCTATTAAGGAATCTGACATGTTACCCTCTAACAAGCATTGGGACCCAA  
GTGGTGGAGCAAGATCTACTAACCTTGCTGAACCCAGCAGTGGTTTTCCCATGTA  
TCTGATGGAGGATTTCAGTACAACCTTTGCTTCTTTGCTACATGAAGATGCGGCGGA  
AGGGTCACCCTGGAACCAAAGTTTGTGTACTGGAAGTACGTGCACAGTAGGTGAA  
CAACAGCAAGTTCATCAACTACATAAGAACTTAACAGTAATGACAACTGCGGCG  
AGGATAATTCCGACGGTGCGAAGGAAACAAGAAATGGATCAACAACCATGTTCCA  
TTCAGACTGCATTCTGTGGGACATATCATCTGATGATCTCTTGAATCCAATGGTTTG  
A

>Peaxi162Scf25743g00028.1

ATGCACTTTCTGAACCGGATGCAAGCTGCATCGAGGATGTGGATTGGGACAATCTT  
CTTAATCACAGGGCTGGAGAGTTATGTCGGAAACGAAATGGTTCGTCAGCTAAGT  
GGTGCTTCAACCATAGAAGAGATAGAAGATAGCATAACAGATAATGGTAATATCAG  
AAAAAGGAAAAAGACAAAATTAAGACACAATTATGAGGATCTTCCACATCAAAAG  
AGTGACGATAGAGTGAGATTTTCTTGTAAATGTTTACCCTCCATCCCGTGACACAATC  
GATGAGAAGCATGAAATTGAGGAAGAAAGTAATGTGGATATTGTTACTGGAGTGA  
ATCGAGGTGTGGTTTCAACCATAGAAGAGATAGAAGATAGCAAAATAGATGATGCT  
ACTATCAGAAAGAGGAAAAAGACAAAATTAGGACACAATTCCGAGGATCTTACGC  
TTGAAAAGGGTGAAAAAAGAGTGCGGTTTTTCAGGTGATGTACAGGTTTTCCCTCC  
ATTGAGTTATTCAACTGATGAGAATCATGAAGTAAAGGATGGAAGTTTACTGCGCG  
GCAAACGATTCACAAGTGAAGAAGATGAAATTATCAATGACGCTGTCTATAGATAC  
ATAGAGGTACATAACTTGGTAAGGACTTGCTGGAAAACAATTGGGAGGGCTATACC

GTACAGGCCTTATAGAGCAGTCTATAATCATGCACAACTCTTTTTTCATCGGGGTGA  
GAAGCATAAATGGACTGAAGAAGAGTTTGAGATGATACAGAAGTTCCATGGAGAA  
CATGGGCCCAAGTGGAGGGTCTTGGGTGATAAACTTGGGAAATATTGGGTTCATGT  
GGGAAATGCATGGCAAAAGATAAACTGGCCAATCGGAACAAAGGAAGTTGGAC  
TCAGGAGGAGACCCACCCAGACTTTATATCTAAGCATGGGATGTTACGGGGTAATA  
TTTGCTGGAGTGCAATTAGTGACAGATTGTCCACCAGGATTAAACAACACTGCTGC  
AATAAATGGTACAAACAGTTAACATCTCCGATGGTGCCACAGGTGAATGGGCAG  
ATACTGATGATTACGCTTAA

Part II. The protein sequences of PaMYB gene family.

>Peaxi162Scf00001g00231.1

MGRAPCCEKVGLKRGRWTAEEDETLTNYILTNGEGSWRSLPKNAGLLRCGKSCRLR  
WINYLRSDLKRGNTSEEENIIKLHATLGNRWSLIAGHLPGRTDNEIKNYWNSHLSRK  
VESLRIPSDEKLPQAVVDLARKGALKQIKRKVGRTSRSTMMRNRKSKNSAVSSLSMP  
KQLKESSEPLNATVPIMPSTPNLEKEALSRTSTISSWLDGNNAMDSMQKEVANIAAPN  
PLMESREAHSSLSSDGMWLEEIIMPLVIDDQDMDPNFIFTCLENGQGESA VKVTEEAD  
NNFLNTSKINERDNNNRESSEAAVSINIHDEQVHEKSNETSSLMKDEGTFDQWDWKE  
ITHDGGKGWPWDDNNSLQLWDTTTDDTGFFQNCINEATVEMDSVHFENQKHSALVA  
WLLS\*

>Peaxi162Scf00001g00599.1

MEGRRPSSSYHHYRYHFHHEDELGEIKKGPWKAEEGEVLLNHVKKYGPRDWSSIRS  
KGLLQRTGKSCRLYWVNKLRLPNLKNVGFSAEEERTVIELQAQFGNKWARIATHLHG  
RTDNDAPKFSSSADQEEFLSKSQSCSSSYIDNSNMIYLVPLNPNSTDFEANLLQLDFTA  
NEKKLKIDSHIQLPFTKLQNDFALPLQTHEFMPNPFIDVFGQQLNGSELNVQVPFVS  
TCSGPDRSCFENPSSPDSFIDDFPLDMFDHIEPLPSQSE

>Peaxi162Scf00002g00037.1

MGRQPCCDKLGVKKGPWTAEEKKLISFILTNQCCWRAVPKLAGLRRCGKSCRLR  
WTNYLRPDLKRGLLSDAEEKLVIDLHSRLGNRWSKIAARLPGRTDNEIKNHWNTHIK  
KKLLKMGIDPVTHEPLKKEANLSDQPNTESDQNKENGHQVQVVPQSTNVTAATAAT  
STFDNNSSSFSSSASSSENSSCTTNESKLIFDNLSENDPLLSCLEADTPLIDSPWEFPMS  
STTTAEEPKSFDISIISNMTSWEDTFNWLSGCEEFGINDFGFDNCFNHVELDIFKTIDNV  
ENRHG\*

>Peaxi162Scf00004g02328.1

MRKPEFSSSGKNGTNSNNNINANMKLRKGLWSPEEDEKLMHYMLTNGQGCWSDV  
ARNAGLQRCGKSCRLRWINYLRPDLKRGA FSPQEEELIIHLHSLLGNRWSQIAARMPG  
RTDNEIKNFWNSTLKKRLKNSSSCSTPSPNASDSSSEPCDNLNMGINQGLIMSMQNH  
NLMSMFMDSTSSSSSSMALNTIIEPLPMLEQTLINMPNGLSAPPYLTTQPCMTQGRSIV  
TNGSLFYGNNHGIFGGNLGMEGELYIPPLESVSIHEYQNVENG NLVERSSQNNNNPTN  
SMTNLTSHFNSSSNNIKVENFGGVGN YWEGDELKVG EW DLEELMKDVSPFPFLDFQ

VE\*

>Peaxi162Scf00006g00098.1

MARTRCYDKSGLKKGTWTPEEDRKLAAYVTRYGCWNWRQLPKFAGLARCGKSCRL  
RWLNLYLPNIKRGNYTKEEDQIIMMLHAEIGNKWSAIAAHLPGRS DSEIKNHWHTSL  
KKRSTQEESTSSTNSKKRSPINSKYISSSRKKRSGSGNQISVKS NVPQLSPKQSCSEVSS  
CASIHVESMHVESEGYQEEYLFEESSGISFWTEPFLVDNSSTTNDFVPS ELDHGLVSP  
FSPVISFDEFICSYD\*

>Peaxi162Scf00007g00207.1

MVRTPCCDENGRKKGTWTPEEDRKLAAYVTKYGCWNWRQLPKYAGENFCTIYTNI  
APREGLARCGKSCRLRWMNYLRPNVKRGNYTKEEDEIILKLHAELGNRWSAIAAQLP  
GRSDNEIKNHWHTSLKKRANYGPNSSSESSKKCNKNSESKRKRVENQNASHETILESS  
HMSPKQSIGEELCSNTTDYKQQDVASVIREEELYEEALAEISGNFWTEPFL LDSFSNR  
FDFRAPSIDCGLVCPSPFIGHELLSSFD FDDSNW\*

>Peaxi162Scf00007g00823.1

MAPDDRGMKNGGASTGRSNGAGSSRQVLKKGPWTAAEDSILMEYVKKKHGEGNWN  
AVQRNSGLMRCGKSCRLRWANHLRPNLKKGAFTVEEERIII ELHAKLGNKWARMAA  
QLPGRTDNEIKNYWNTRLKRRQRAGLP IYPQELQQQNQHENNNQPHSLLSSSYDPQN  
STNYNSPSLSLLDIFNPSTMKPSITQ QFPINTPSLCLPSTNNNNIFRNTPKGLSLTL PSSM  
RNSQFSSLPNNNFTQGLSSNSIQVPPFQHNYPNFNINRPFTGISSNPNGLICMGINTIN  
YPSGQSSMPVTASSENTGSDFGSSDNANNYANTNGLSRGNSGLLEDLLEESQTLNRP  
GMKIEDNFLDLKEDQEADYK GKSM LWEDYGLVEDAE EAILTEESAYSFAHGVDHVA  
QNKNSESSSPHSPPNSSSGIFMKKEDSFHGTNQADDDIMCLLDNFPLAVPVPEWYEDE  
DDKNNCNGQSSNVTNCDHIAENQAEDSKSPALTLNSGTRNHDWEFGGCCWNNMPSF  
C\*

>Peaxi162Scf00007g02122.1

MVRTPCRDEYGRKKGTWTPEEDRKLAAYVTKNGCLNWRQLPKHAGLARCGKSCRL  
RWMNYLRPNVKRGNYTNEEDGIILKLHTQLGNRWSAIAAHLPGRS DNDIKNHWHTS  
LKKRANYESSKKYNKNRESTNTKNQASSRRKSTVENENASSLSCSMSTHETILEGSQ  
WSLKQSSEEISSCTADYQQLDIASDIREVKVFEE EAYVAESCGSFWTEPFV VDSFSSR  
LHDCVAPSIDFELVSPSPFIGHGFIS SFNLDDYLM LSSLFD\*

>Peaxi162Scf00007g02125.1

MVRTPSIDKNGMKRGAWSEEDNKL RAYVERFGHPNWRKLPRYAGLMRCGKSCRL  
RWMNNLRPGLKKGNYSHEEEQLIIKLHNQLGNRWSTIAAKLPGRSDNDIKNHWHAH  
LKKRTKTNANSSTMEQMSTESSQSGCQAEQSNSKLP ELENYCDPIDTSSPPEVSSSDL  
SLFSSCSLLNGMDWIEDDQIRSMEQLSNIDSVEPLLD SFSCWTKPIDNFQTEHCFDNV  
WSEHFDNFWTQPFL\*

>Peaxi162Scf00007g02128.1

MVRTPSVDKNGVKRGAWTEEDNKL RAYVERFGHWNWRQLPKYAGLMRCGKSCR  
LRWMNYLRPGLKKGNYSNEEGQLIIKLHNELGNRWSAIAEKLPGRSNDNDIKNQWHS  
HLKKRAKTNYSSTLMEQMSTESSQSGSQSEQSCKLSELEACDKKEVTSAIDRLDS  
VPPVSLEVSSSSLLNGIMDYWMEEEDRMFRPSMELLSIMVRTPSIDKSGMKRGSWSE  
EEDDKLRSYVERYGHPNWRQLPRYAGLMRCGKSCRLRWMNYLRPGLKKGKYSHEE  
EQLIIKLHNQLGNRWSTIAEKLPGRSNDNDIKNHWHAH LKKRSKSNNTSSAIMMKQLIE  
CSQSESQDDEHSNSKFAEHDSFSPIDSVQPVSSDVSSSSVLNGMDCWFEE DNHIFSSM  
EPLPDFFNFSWTKPIYNFQTEPFDHYWTEAMDNFWTEPFF\*

>Peaxi162Scf00007g02414.1

MGRSPCCDKNGLKKGPWTPEEDLKLIIQYIQVHGPGNWR TLPKNAGLQRCGKSCRLR  
WTNYLRPDIKRGRFSFDEEETIIQLHSVLGNKWSAIAARLPGR TDNEIKNYWNTHIRK  
RLLRNGIDPVTHSPRLDLLDLSSLLNSTQFNLSSLLGLQALVNPEVFRLATTLLASHNN  
ENPELLLQKLQENQLLNTQLQQNQLLNTQLGNHLQVFQPN SQFQNQIQEIPTFTPSNV  
PCSSSQPMQLGPVELSYLMNGQMLPPQYGYCASNVSDSSNLQSLNNSNNQNSSNFSL  
DSVLSTPLSSTEDEKESYCSNLMKFEIPASLNFDDFM\*

>Peaxi162Scf00008g02024.1

MGRAPCCDKKGLKKGPWAPEEDEKLEIYIKNNGHNGWRSLPKLAGLLRCGKSCRLR  
WTNYLRPDIKRGPFSSEEEKLIIQLHGILGNRWAAIAAQLPGRTDNEIKNLWNTHLKK  
RLFSMGIDPHIYEPSSAPSGLVRRPPASSSTRHMAQWESARLQAEARLSKDSHLSIPSL  
VGKSQSDYILRIWNSEIGEAFRNFKGVEKTTSESSSPKCGSTSSITTEMDITLTGSSVEG  
TNQHKDAEWKNCKLYTGNILRGSDTSSSNDFEESSESALQLLLDVPSKYDLSFLGQSD  
AYSMYPAFLSESCLNCSSTEHEVCYV\*

>Peaxi162Scf00009g00022.1



MEFDHSSNQNLSQLPYNNLIRGEMDDVFCTVSKDYLQDFHHLDLTFNNPHDNLIE  
TNGYDSLFDPIILNEGNLSSLDHQDFNLNYEFKPFQNSASGSTLVMKNFENSMDMHT  
SNDENLLSLCEDMKPLSFVNVQDESSCITADNNYYDNKICRRKKNKKVSSKENILSP  
CMGKLGKGKKKSKSAKGQWTEEDRLLIHLVEKFGVRKWSQIAQMLKGRIGKQCRE  
RWYNHLRPDIKKDLWTEDEDRILIEAHAEVGNKWTEIAKRLPGRTEHSIKNHWNATK  
RRQFSRRKCRTKWARPSCLLQNYIKSLNFEKSIRSSHDTTINAPKQEPFGNIPDYDLTSE  
VPEFAFDDKLFDENINMDALMDQIHDRCLDLEIPYDELPKLMQGDANKEPDSIDLISEI  
>Peaxi162Scf00009g00621.1

SQKVRWSNRLKPDLKEDNFTPQEEELIHLHATIGSRWSIIAQQLPGKTDNDVKNLWN  
TKLKKKLSAMGIDPVTHKPFSQLTDYGNIGGFPAKARTHFVSLNRELKGAFMSRPEQF  
QHPLEIFSNFNHCLTTIKLPKAEASEDCFLSNTNDSSNNQPPVDLLTELQAIKFVTDAS  
NYSSPKAIFSRNPINDYSSSPLSSSSSSSSASHSLSKTQVERASPGLNWCYLLDDAFIP  
SNFQVQEDTLTIEDKLASGAAQDGQSNMPSMKDSETSLSTRGASSSSSSSFVEDMLECE  
NEMFLNFPGLSEDPFY\*

>Peaxi162Scf00013g00223.1

MGRPPCCDKIGVKKGPWTPEEDIILVSYIQEHGPGNWRAPVPTNTGLLRCSKSCRLRWT  
NYLRPGIKRGNFSEHEEKMIHLQALLGNRWAAIASYLPQRTDNDIKNYWNTHLKKK  
LNKKMEGHDHENINEVGKSSSSSQSNVPKGQWERRLQTDIHMAKQALCEALSLDTP  
SNVDSPNNNNNPTPKILPVDQQPVQTSTTYASSAENIAKLLNWMKNSPKSSESRS  
KTTQMSSLNNLSIGAVSSSSPSEGTRNVLDVFSFNSSNNSDVSQMSIDEGGNFTPEN  
NNATIFQVESKPINLPNFKEDNGIFQQVSKPNLETQQVPLTLLEKWLLDDANAQAAQE  
EFMGIGMGMTLGETADLF\*

>Peaxi162Scf00013g01023.1

MGRTPCCEKLGLENRGPWSKKEDDILINYIDKHGHPNWRQLPKLAGLLRCGKSCRLR  
WTNYLRPEIKRGNFTPEEEDTIKLHQVLGNRWSVIAAKLPGRTDNEIKNIWHTRLKK  
KMNQSQIQEKTDPDIREQPSETSKSEDSTNIQENTEISSPKPNSNNQHEPSSSLRSSSITS  
SSEGSCNNTTTTSSHIDESRDQMNLNLLLEVDDNFWSEVLWATPADDSKDNNDLDFSL  
SVEKNYELDSSLNDNLWLWDDLFSRANEFLLFPELV\*

>Peaxi162Scf00015g01036.1

MTSLSKSSSSSSDDDIGLRRGPWTVEEDTLLVHYISHHGEGRWNILAKRAGLKRTGKS

CRLRWLNLYLKPDKVGRGNLTPQEQLLILELHSGKIGNRWSKIAQYLPGRTDNEIKNYWR  
TRVQKQARHLKIDSSISECSNLIPPGDSGLNTFIKAHFPLDGESYDMDTFSPATCSFKDV  
LYYDQMSGENNAPGDVLADSFWSMDEF\*

>Peaxi162Scf00015g03118.1

MVRAPCCEKMGLKRGWWTSEEDQILISFIQRYGHENWRALPRQAGLLRCGKSCRLR  
WYNILRPDIKRGNFSEEEEEETHIEMHQVLGNRWSAIASRLPGRTDNEIKNFWHTHLKK  
KLEHNDLRATTTAKRSPHEMIPRWKIEHHISSNYQASQNIANQYPTCHDEDLQENNST  
SDTQANKEESMQPTNTQIGHDGDASISNDM

>Peaxi162Scf00018g00228.1

MGRTRCYDKSGLKKGTWTPPEEDRKLTAIVTRYGSWNWRQLPKFAGLSRCGKSCRLR  
WLNLYLQPNIRRGNYTKEEDEMIMKLHAEIGNKWSVIAAHLPGRSDNEVKNHWHHTSL  
KKRSTQEESTSSTGSERRSNNSKYISSSRNKRRENGTQISANSNIPQLSPKQSCSELSSC  
ASVDQHVENMHAEREVFQEEYLFEESSLISFWTEPFIVDNFSTTSDFVTSQTDGGLVS  
PFSPFTRVIWVIFQFCAYHPWHLDTGTPDKRDISLAALVVSLSKSLVESFDTKLKENMM  
NDEPKKLIIELSVLKMKKLRNHCRCPCARAVDPRERSERNNGGRLEKRRAPVMNRQSN  
RWPPHA\*

>Peaxi162Scf00020g02349.1

MVGMMGWGANSQQEWKRGWWTPEEDKLLSEYVNLHGEGRWSSVSRGAGLNRTG  
KSCRLRWVNYLRPGLKRGHITPQEEGIIELHALWGNKWSTIARYLPGRTDNEIKNYW  
RTHFKKKEKASSKQDKRKTLRQRINNQPQLQHDTNYKFSPQPEEVIMQNSDEINEHN  
DTLTFTYHPNMENTIVDLPPVRTSSDISYIWTDFVMDGLWGGLWNLDVDDHSQPAS  
DKCKVAIQNQPTDYQ

>Peaxi162Scf00029g00131.1

MVLGDEKEGMLRKQEKKSCKSNKKAINGLALTADVKAIKGDFSDEEKLTVVET  
LIQRDKEEMETKAAGEIDQCGVKRKKKRGGNHLRKSNDSDAEGVEEKKHKL  
KKCKDEQQTMYAPLDTEKSAPASSETWDNDKVVETFGVVSSGNAVDEIRRKNK  
SKKSIKTSATSGETNTEVNQGAVFPSIEEREESRTENGNIKRKNVKLGQRPEPIH  
ENSEKRVRFSGHVQVFSPNDPSDEKHEIEEETLLRGKRFSKLEDEIKNVHVKYIEIHN  
MGEEGLQKILNSRSHPEIKGCWKEIGSAIPYRPIYISVYYRAQVLFRRCETRWTEEEY  
EMVRKFHREHGPKWKVLADELGKHRFHVKDTWRRLKLSNQKKGQWTQEEYQTLF

DLVNTDLRLKLSSEDKKSKYGMLRDNIPWSAISDKLSTRTAPSCCLKWYDQLTSPMVA  
KGEWADADDYHLIDALFVLDA SCVEDVDWDNLLDHRPGEICRKRWNQMVLHIDQC  
GNRSFAEQIEVLAKRYRPDLAEVRETWDSKPIVP\*

>Peaxi162Scf00033g00251.1

MAQRKESLDRIKGPWSPEEDELQRLVDQHGP RNWSLISKSVPGRSGKSCRLRWCNQ  
LSPQVEHRAFTPEEDETIRAHAKFGNKWATIARLLSGRTDNAIKNHWNSTLKRKCCS  
VSEDL SFETPEQPPLKRSSSVGPGPGPSSPSGSDLSDSLSCFPQPPLVYRPVARPGPIFP  
PPPPVQIPNPQKPD PKDPV VQDPPTSLCLSLPGSENQAVQSPTTAQLPPVAPLPAQQG  
Y EYGGATSATEKQFFTPEFLGVLQEMIRKEVRNYMSAGFVEKNGMCMMQTDAIRNA  
VVKRMGISKIE\*

>Peaxi162Scf00036g00710.1

MGHHCCSKQKV KRGLWSPEEDEKLIRYISNHGHNCWSSVPKLTGLQRCGKSCRLRWI  
NYLRPDVKRG SFSEAEERTIIDVHRILGNRWAQIAKHLPGRTDNEVKNFWN S CIKKKPI  
SQGLDPNTHNLLSRNSTQNNKNNASCKVKSTS VFTLETMPSSNKEVPMDMIKSSLAA  
FLPLPHNSKTISTAAYNDNMNSINVPRTTTNIDFPRSSLMESTSNNYLSSLTPPGYGIINY  
ENYCMWAVSGVERHDFGPSINGHEEMRIVEQEGGQVVQLQEKVFQAEEVYKINH DQ  
FNINGQKTYVDDANFSFESVDSALMMPYGIYTSVKSIDHFAWN\*

>Peaxi162Scf00038g01640.1

MGHHSCCNKQKV KRGLWSPEEDEKLIK YITTYGHGCWSSVPKLAGLQRCGKSCRLR  
WNYLRPDLKRGSFSHQEAALIIELHSILGNRWAQIAKHLPGRTDNEVKNFWN SSIKK  
KLLSHGTLSDHLSMFTNFTNP NPSFDFNYTLINPNNPVNLLPAIN SPLILQVDQMNN  
VNEDLNANS MAPSLIPFSFDSIPNDPSWFFNYPHSQHDLDYKQDNSNSIVSSNISLNYT  
DAAGGILMDSRNDPIKSSTHQDLLVVPNLLPRLSPPAPLQQNFDSMVVNTSTN

>Peaxi162Scf00038g01818.1

AHVMMDDILIKKGPWKEEEDAVLIKHVKKYGPRDWSSIRSKGLLHRTGKSCRLRWV  
NKL RPNLKNGVKFS AEEETT VIELQAQFGNKWARIATYLPGRTDNDVKNFWSSRQKR  
LAKILRNSASQPSTPQKNNNKEALALQKVPSVEEPKLSSPAEERSLTMSQCCSSSYM N  
NSDTINMVPLPELENSTSLPFEPNLLQFEFTPNDKNYQYIETQMSLSFPQIPLQTDLGHP  
LGSQELPMKLEETDLLDFGQLSTASDIGNVQVPLVPLCSGPDKSSEIVVKREMD SPLT  
QDSFIDDLPMDFDLIDPLPSPSDWWNSDLSISERKKGN CN\*

>Peaxi162Scf00041g01811.1

MGRSPCCDENGLKKGPWTPEEDKKLVYIDKHGHGSWRALPKLAGLNRCGKSCRL  
RWTNYLRPDIKRGKFSEEEEQTILHLHSILGNKWSAIATHLPGRTDNEIKNFWNTHLK  
KKLIQMGYDPMTHRPRTDLFASLPNIIALASLLQHHPLEDHAVRLQAEAAQVAKLQY  
LQWLFQSSSSSSNNYPIATSLNTTQYSNLEDFGPFNLSNSTKESTPSINLSLLENQALFS  
NENSGSQLLHNPDTSLPLTDTQEVPFNFQAHLNNNNNSNNTSGDNGQDFNFEICSPSS  
PLHNIIPSPSSSRLPPLTEISISNNQGDASSTNSSNAEAGTSSYWPELFFEDHFMHEIA\*

>Peaxi162Scf00042g02519.1

MGRSPCCEKAHTNKGAWTKEEDERLVAYIRAHGEGCWRSPLKAAGLLRCGKSCRLR  
WNYLRPDLKRGNFTEEEDELIHKLHSLGKNWSLIAGRLPGRTDNEIKNYWNTHIRR  
KLLSRGIDPTTHRPINEQPTISTQKVTTISFAADNNKDDQDQKIINIKSEFETTSKLQDEI  
QERCPDLNLELRISPPHDHQQFNDQSIDELGRRNSLCFACSLGIQNSKDCSCNTNGNG  
CSSNVSMNIASYDFLGLKTNGLLDYRTLES

>Peaxi162Scf00045g00138.1

MGRSPCCTNNNLNKGAWTKEEDEILGNYVKIHGAAKWNILCKKAGLNRCGKSCRLR  
WTNYLRPDIKRGNFSEEEEDSLIINLHSSLGNKWSKIASQLPGRTDNEIKNHWNTKLK  
KLNLKLGIEPQTHKQIPNFNLFNSLQMPPLFSQQDVTQLAKLQLLHFQTLLQTINAITTT  
FPSNPLMPNINYPMQDDVNGILNFSMPNFEEDDDNLKKGPWTEDEDEKLIDYIKQNG  
HTNWQSLARKAGLNRCGKSCRLRWNNYLRPDIKGRFSPEEEEEIIINLHSDLGNKWS  
KIAAHLPGRTDNEIKNFYNTHLRKKLLRLGIDPKTHKPISKLNSLVNLSHHLTSNSNYF  
LSLASVLSLQAQFSLAKIQQVIQSPLPTINTINLLSSIQGNILSNSSPQLESRLNETEMS  
KFLDSSLANTTTTPCLDNTNL

>Peaxi162Scf00047g01824.1

MAPNGGGVKTSLARNISHGGTRHVLKKGPWTAAEDAILMEYVKKHGEKNWNAVQR  
NSGLMRCGKSCRLRWANHLRPNLKKGAFSLEEERLIVELHAKLGKNKAHNEIKNYW  
NTRLKRRQRAGLPIYPQDIQPQNQHEHNISSLFDHPQNSNFNPPLSLLDIFNPSTMKPS  
VNSQQYQFNNPSPFLTNTNNNNNHFKLFHDPRVSLSLTLASSIRNSQLSSLVAPVPKTF  
SQGLTTSMQVPPLQHNYPSTNTRPYTAISTNPNGLILGMGIETTTCSRSTGNDYMK  
ATSSSDADNYNVVDPGLSRGNSGLLEDLLEESQTLTRAEKIEENCLVDENEASQGKLV  
WEEYGLTEESTYSFAHGGDDTPNSSSGITTKDASLELANQVDDDIMERFLDNFPVAVP

APDWCDDENEQNNTCNGHYFEPRDQMD\*

>Peaxi162Scf00050g00512.1

MNPRGEDFFGFQKHHITHSFYLYKQVFSSNIFQPTINHKFKKIPFGSKLVEGKKILKMG  
RAPCCDKASVKKGPWSPEEDARLKAYIEEHGTGNNWIALPQKIGLKRCGKSCRLRWL  
NYLRPNIKHGGFTEEDNIIICSLYISIGSRWSIIAAQLPGRTDNDIKNYWNTRLKKKLLG  
KRKQSQMNRLLLAGGQDLKETNGLEENSLQNLSNSALERLQLHMQQLQSLQNPLSF  
YNNPALWPKLTPLQQKMIQTLQATGLSIENQSSLLAQISPSANQVDQLGQKVGINEFA  
NTMSTRFKVNNEVEKSTVNNGISSSDSPIDFSNQKDVLDTNIGQENTGEIQGIQGFTQA  
EIDDLILINNKGLIADQFDCFKEMDGSSSRDNLAWWSNDFDTNTTSSNSWGSSSNIV  
QQTEGMYQDYALGYNLQ\*

>Peaxi162Scf00056g00026.1

MGRRPCCEKKGLKKGWTPDEDDKLEIYINKNGHGSWRSLPKLAGLLRCGKSCRLR  
WTNYLRPDIKRGPFSEEEKLVIQLHGILGNRWAAIAAQLPGRTDNEIKNLWNTHLKK  
RLLSMGIDPQTHEPASAPNGLLRRPPASLSARHMAQWESARLEAEARLSRESQLLVPS  
PVGRSETDYFLRIWNSEIGDAFRKFKKGAKTACHSSASQASSCTKCGSASGIKTEVEL  
RVAAGSPVTGSNQTEFAEWRNEQPHTEDILQGSdTSSSDAIEDSSSESALQLLLDFPSNN  
DMSFLGQSDSYSMYPFLTASSLICP\*

>Peaxi162Scf00058g00238.1

MEEVKATQVTYSSGMPVTVKLAEDNIEMRKGPWTLDEDSILIHYSISLLGQGRWDSLA  
QFAGLKRSKGKSCRLRWLNYLRPNLRGGKFTPQEQLLILLHFRFGNRNDYYLCFRWA  
KIAEHLPGRTDNEVKNYWRKTVQKHANQLHCNVNSQEFRDVLRYQWLPSLAEQIRV  
TPSSSLHEYLMASSTAHNKTTEVKENISPFLETGIGSTSITSPNVVSSTNSSEAEPLPM  
DNSLWSFSSSNWCSSFEDGYLYSSQDQCHSWASVAGSELVPANETLVSMGKDLASH  
GNISSEDTKTSYDEEVRRQCIRP

>Peaxi162Scf00065g00016.1

MNNLKPILEIRGNFAEDEDLIIRLHALLGNRWSLIAGRLPWRTGDEVKNYWSSHLKQ  
KLRNMGIDPMTYRISDYVCRKSHLDLWHESETETNEKPCDARSSWGQDDHEPSSLP  
HLKS\*

>Peaxi162Scf00066g01813.1

MAEGGGSGDDTRSSCPRGHWRPAEDERLRQLVEQYGPQNWNSIAEKLQGRSGKSCR

LRWFNQLDPRINRRPFTEDDEERLLAAHRVHGKWKALISRLFPGRTDNAVKNHWHVL  
MARKQREQSKICGKRSYPQDNFLSDSKSPSYGFRRRNNNNNNNTNIPKTQEGYNYGTK  
FSLFEFQNPTKDRVFSVSTYSSSPSWNSPDQLFRRNGSHLLKESSNFSGQKSLCQNNLS  
FSTHGGGGATLFPVPNNYKKTARNPFSSNNGSDGMTEKVMNISNSTFSFNKILRAS  
IEQQRQQQQQHAEAAIEKKDIPFIDFLGVGISS\*

>Peaxi162Scf00071g00135.1

MGRHSCCYKQKLRKGLWSPEEDEKLIKHITKYGHGCWSSVPKLAGTFSQEEENSIIEL  
HALLGNKWSQIAARLPGRTDNEIKNLWNSSIKKKLRQSGIDPNTHKPLSEIENEHQKA  
STTNTKNNNKSTSECNSAFNSEKPKPSSLTIDQSYPLIETNMSSSTGYNLSFQQLNYEP  
NTTTIELQNNCNLFDNNNGFSWGAVDSVKSEKEAQEIKWSEYLQTPFLLGNTIQQNH  
QSTIIPQDLYSETRSETQFATQGSLSATWLQSQHQQPNSLQTPDLYHKSFLRLPAAFG  
QYS\*

>Peaxi162Scf00073g01731.1

MDEIKKGAWSPPEEDQKLKAYIKKYGIWNWSQMPKFAGLSRTGKSCRLRWMNYLSPD  
VKRGPFIDEVEIVIKTYQELGNRWSAIAARLPGRTDNEVKNFFHHLKKHMSLKNL  
HALMKKKARSKRVMKKTRENEKTNTGKAQERPAVEVVPTKIPMIGSSSNKNSPSPNS  
SSSQCNISIITCQENPTDQDCYNNISSSRVDQPVIMNMESPFILSNPETSESSLGDTNCN  
QLIHQFDQYPHDSCNTISDGSSFFDSFDQFDMIISLFLTSLNLFNLVMVAGLSRTGKSCR  
LRWVNYLRPDIKRGPFSMEEVEIVMKMYQECGNRWSTIAANLPGRTDNEVKNFFHT  
HLKMHLGVKNDVTVKTKGRSKRVKKTNKNEKKLADNAQERSADVAPCSSVVICEE  
NHMMDVMDFSKTYQDCYNVSSLVDQSVINMENTVILESNPETSETIDAANCQLHQFD  
YSHLCSSLFDDHRFNSLDMNSFWSD

>Peaxi162Scf00074g00355.1

MGRAPCCVKEGLRKGPWSAKEDSLLTNYINQHGEQWRSLPKNAGNRWSLIAGRPL  
GRTDNEIKNYWNTHLLKKLKSIVGIVPKPHKIFSKKASKKGQSIQVEKTKVYVPKPIRI  
SCGISRNNSFENVTFSTTCSSNSYEDVDVEIENNKDGIMNNENEVNFIDICDEFMEDW  
CHFSNKGSLPMNESMVDKVYEEYLLLLSENCYLQEDQREHPLTGNVSEL

>Peaxi162Scf00074g01820.1

MGHHSCCNQQKVKRGLWSPEEDEKLIRYITTHGYGCWSEVPEKAGLQRCGKSCRLR  
WVNYLRPDIRRGFRSPSEEEKLIISLHGAVGNRWAHIAHLPGRTDNEIKNYWNSWIKKK

LKKPSKPSTNTTSCTEHQQQRSQFSYNTTSQPEILFTQDLGVTKSQILQDSALFTSPN  
PLFYFDNGNSLETMTNNVNDRSTNASLFQETSVLNSEFWQVDLQQQVHTSYTTGIHS  
NYLPPLLEMPHMEIPSSNNNMVEGQDHHQLNEWNMDTQQCCPSYLFWDQETGTL  
GGDHEFVDPNNTSNNIGQILSSFPSSL\*

>Peaxi162Scf00078g00024.1

MCSRGHWRPHEDQKLRELVEKYGPHNWNIAIEKLQGRSGKSCRLRWFNQLDPRINR  
NPFTEEEEEERLLSAHRIHGNRWAIARLFPGRTDNAVKNHWHVIMARKCRERSKIYAK  
RATAASATTIAHQKSTSDEQELSSLMQQDKRQISNEHTTRSFNPFVDAHQQYFFSERFA  
YPCNLTYNYSLYPKLLHKDYLFFHAKVNQDEKQRTEFYDFLQVNTDSNKSEVIDHIN  
ASARIMRDDEEVEQEAVDLHRSKSSRGFIDFLSVGDSI\*

>Peaxi162Scf00080g00064.1

MDKKPCNSQDAEVRKGPWTMEEDLILINYIANHGEGVWNSLAKSAGLKRTGKSCRL  
RWLNYLRPDVRRGNITPEEQLLIMELHAKWGNRWSKIAKHLPGRTDNEIKNYWRTRI  
QKHIKQAETMNGQAASSEQNDHQEACTSQMSNGPNDNTIDQTYSPTSYSGNVDTFQ  
AGPNFLTEANDNMWSMEDIWSMQLLNGD\*

>Peaxi162Scf00088g01621.1

MKDKEVKARMKRGFWKPEEDLILKNCVETHGEGNWATISEKSGLMRSGKSCRLRW  
KNYLRPNIKRGMMSEDEKDLIIRLHKLLGNRWSLIAGRLPGRTDNEVKNFWNTHLNK  
RSCKGKKKHNKAAEEANHQRKNDREYPAETARNQEVA TKTVLDSWIEEMQDFNCSLL  
SPLPMNSVAFLQDEPFFPILDDIVLLEAFTSTGKEVWPDIQPFL\*

>Peaxi162Scf00089g01411.1

MGRHACCVKQKLRKGLWSPEEDEKLCNYITKFGVGSWSSVPKLAGRTDNEIKNFWN  
SSLKKKLMKQGIDPNTHMPLSENTQVRDEENCTDKTSM LQMPHLNGLPSAEMDQTF  
HTTNRSFNTEAKNGHLTEASKEDQFVSKQVFDIMFLHGYQSNVNPSAYDSEVLAQYQ  
QIIRSYDHPSEFEENPNYGICSETSLTKFEHGQT TETDFASSSSNSSNICGYQNNATRIRT  
NGMLEINETLSWDVENKMESIFYPYIEIKNEELKQRP GDFSNCPLSCLTEELCGANL  
DVIQQI\*

>Peaxi162Scf00090g00168.1

MGRSPCCEKEHTNKGAWTKEEDERLT KYIKEHGEGCWRTL PKAAGLLRCGKSCRLR  
WYNLRLPDLKRGNFTEEEDELIINLHSL LGNNSTNLNKKITSTTAGASTTTSQCFQQLQ

AHSSGTLLWTRSGLSDSIINNIFISSMVKSDSAAEDSNSSSDLSEEMVHPHLNLELSISL  
PQPLEGKELRKEEQLFHEPSFTSASSVTQP

>Peaxi162Scf00096g01718.1

MGRAPCCDKANVKRGPWSPEEDAKLKAYIELHGTGGNWITLPQKVGLKRCGKSCRL  
RWLNLYLRPNIKHGEFTEEDNIICSLYISIGSRWSIIAAQLPGRTDNDIKNYWNTRLKK  
KLLGKQRKDHRHHKLEMMKENENYFASQDINAYSWPPQPLLFSSLVAPTNEYQQSGS  
SGNRHNFQYSTEVSQAQFDPSKFSQSSAFVNPLSGNTCNSLSCYYPISNGVITNSFQEYN  
NYISVGLDHDVNLVSNLQQVDQSVIEMVNSSSTIISTTSPEISTSWEELSPIVFPPSVSNF  
EIQQEISPYFVFEEPRYLGLLKQ\*

>Peaxi162Scf00102g01226.1

MGRKPCCDKVGVKKGPWTTEEDKKLISFLVTNNIGQCCWRSVPKLAGLRRCGKSCR  
LRWTNYLRPDLKRGLLTEAEENLVIDLHSLGNRWSKIAARLPGRTDNEIKNHWNTHI  
KKKLLKMGIDPVTHEPLNKEEKSRDQSTKTDDIDNKQNGHDDQQVHVLESTNVT  
AATSLELENSSLCSSSSFPNENSSCITDESQMVLDTFSENNPLLSSMLHVDAPLIDFQ  
WELSASGTTQKQNLNENFNWLVDQCDFGIHDFDFDCFNMEMEYFLDSIGDIKNEK\*

>Peaxi162Scf00102g01858.1

MGRAPCCAKEGLRKGPWSAKEDLLLTNYIKEHGEGQWRSLPNKAGLLRCGKSCRLR  
WMNYLKPGIKRGNLSQDEEDLILRLHSLGNRWSLIAGRLPGRTDNEIKNYWNTHLI  
KKLKSAGIEPKVNKSFSKYCSKKQATTDKPRKKQVKKKKKNKKIKDQPLVQDTSEPPQ  
VVFIPKPIRISSGHSRNYSDQNVALSTSSSNSADNNNNISNNEGKQAEVSFDPLFDEV  
VLDGCCELSPEWSLPTDDSMLEKVYEEYLQLISEECFLQLDDPLAENASHHPMLM\*

>Peaxi162Scf00110g00004.1

MQEQGQRRGQWLEEDERLAMIVASLGERLRRSGKSCRLRWLNLYLRPNLNHGHTE  
DEERLIIQLQKQLGNK\*

>Peaxi162Scf00114g00127.1

MGRAPCCDKANVKRGPWSPEEDAKLKEFIEKYGTGGNWIALPQKAAYTPTLEAGKK  
NISYIEVKLIHLCDRWSIIAAQLPGRTDNDIKNYWNTKLKKKLMGLMHSSNQRKSPFF  
PSTTLQTITPTQPQTISLFRYSYQEPNISSVQPNFMYNNNHMNFQLGTNNQYSYFHCQ  
ESLVNPIKQEEMGNCLEGQTPRTFDHETQKFTLDYGNNIGGGGDHNLAWAHDQKPN  
GYLANNFQTQFQYDVEEIKELISSSSNGSGCNNSSLLFVNDENKPNERGMYFY\*



>Peaxi162Scf00118g00310.1

MSTSNASTSGVRKGAWTEEEEDLLLRECIEKYGEGKWHLVPVRAGLNRCRKSCRLRW  
LNYLRPHIKRGDFSLDEVELILRLHKLLGNRWSLIAGRLPGRTANDVKNYWNTHLRK  
KLIAPHDQKQESKS\*

>Peaxi162Scf00125g01321.1

MLCQLMSSEQMGSWGVIIEGWKGPWTAEEEDKLLIEYVKLHGEGRWNSVARLAGL  
KRNGKSCRLRWVNYLRPDLKRGQITPHEERIILELHARWGNRWSTIARSLPGRTDNEI  
KNYWRTHFKKKAKNSSANSEKSRARLWKRRQFQQLQQQQQQQQQQINDHIDIKKM  
MSLFDQENENKGQLMPQGKQEMAMLYPNTTNQQEQVGLFYMLNGCASVSLPEPSS  
NEDTMWDGLWNLDIFYGHFINTSTTYNKATPCLQTMATIPPAFY\*

>Peaxi162Scf00128g00742.1

MGRQPCCDKIGLKRGPWTEIEDHKLMNFILNNGIQCWRLVPKLAGRTDNEIKNHWN  
TRIKKKLKLGLDPLTHKPIEQFDHLKNDDIEQQDSSEKEEKEKLELLEKNLPNSLDYT  
QEQEIQNSTSSSSLDDMNNFQNSESELETFSKEMFNSGLEDPFQNW

>Peaxi162Scf00129g00228.1

MGRPPCCDKIGVKKGPWTPPEEDIMLVSYVQEHGPGNWRAPNSTGLRRC SKSCRLR  
WTNYLRPGIKRGSFTDQEEKMIIQLQALLGNKWAAIASYLPERTDNDIKNYWNTHLK  
KKLKKLEAASCGSDLYSKDSCLSSLSSTSKGQWERTLQADINTAKLALQNALSLEKPS  
AIQEYMATDVKPKNICYPYIKQEGNNSTSTYASSAENIAKLLKQWTKSSSSTNNSENS  
KGSSSTQLSCNYNNATNDFESISNFESFEQSKSDQFSQATTPEESKFYGESKRELDQV  
PLSVMLENWLFDENEDLF\*

>Peaxi162Scf00129g01231.1

MDKRTCNSQDVEVRKGPWTMEEDLILINYIANHGEGVWNSLARSAGLKRTGKSCRL  
RWLNYLRPDVRRGNITPEEQLLIMELHAKWGNRWSKIAKHLPGRTDNEIKNYWRTRI  
QKHIKQADQNMNKSSKCEQHNDQQAISTSQASTGPTDTIDSYSPSYTGDTNNNMGN  
ITFQGNFPTETNENIWSMEDLWSLQLLNDATN\*

>Peaxi162Scf00132g01412.1

MGCKQMDKPKQKHKRWSPDEDQKLKDYILRHGHGCWSSVPINAGLQRNGKSCR  
LRWINYLRPGLKRGTFSEEEETVLT LHGVFGNKTDNEIKNHWSYLLKRVIKKAENE  
GDARSGYSSPQIGNEESSHSSMKLASQNSSLDSFEHIECSLLADTDQSSSLQVDFAREN

CKSNLPRVLFSEWLSFDQLNGQDFKNSSNQESKNNFGYNNSVFQDSCMHGPLMNDI  
NQALNRGMVDDMFQPTLEFEDHISADGFEELISGEFNINGDMMYI\*

>Peaxi162Scf00134g00189.1

MGRQPCCDKAGVKKGPWSAEEDKKLINFILNNGQCCWRALPRLAGLMRCGKSCRL  
RWTNYLRPDLKRGLLSGYEETMVIELHAQLGNRWSKIASHLPGRTDNEIKNHWNTHI  
KKKLKKMGIDPVTHKPITSDQPNIEQPTKDQPITSDQPTIEQPTKNQQEKQNIMPPSTV  
HVVQEMDIDQNKELVETPIQSTVTVTKLEEGTSPKNMEPIQVNNGFCTDEVPLIEPHEI  
LVPSESTPSTSSSSSSSPLEDMQFLPSFDNWQCDFNNMDNIGINWAHDFSSTLDYLLND  
DDNDMKNISLQDWSQVLEV\*

>Peaxi162Scf00135g00313.1

MRIMIKGGVWKNTEDEILKAAVMKYGKNQWARISSLLVRKSAKQCKARWYEWLDP  
SIKKAKDEKLLHLAKLMPTQWRTIPIVGRTPSQCLERYEKLLDAACAKDENYDPND  
DPRKLRPGEIDPNPESKPARPDVDMDEDEKEMLSEARARLANTRGKKAKRKAREK  
QLEEARRLASLQKRRELKAAGIDARQRKRKRREGIDYNAEIPFEKKPPPGFYDVAEEDR  
PVEQPKFPTTIEELEGERRDREARLRKQDVARNKIAQRQDAPTALHANKLNDPEAV  
RRRSKLNLPAPQIPDHELEAIAKIGIASDLLGGDELSEGNAATRALLANYAQTPQHAM  
TPMRTPQRTPATKQDAIMMEAENQRRLNQSQTPLLGGDNPMMLHPSDFSGVTPKKREV  
QTPNPLLTSPATPGSSGLTPRIGMTPSRDSYGMTPKGTPMRDELHINEEMDMHNNAKL  
GQLSSKKELLSGLKSLPQPKNEYQIVVQPAPEENEEPEEKIEEDMSDRIAREKAEAAEAK  
RQALLRKRSKVLQRELPRPPIGSLELIRSSLLRADGEQSSFPPTLIEQADEMIRKELLS  
LLEHDNSKYPLDEKAEKEKKKGVKRKLAAEPLIEDFEDELKEADGLIKDESQFLCV  
AMGHESESLDEFVEAHKTTLNDIMYFPSRNAYGLSSVAGNMEKLAALQKEFENVKK  
KMDDDTKKATKLEQKIKVLTNGYQMRAGKLWSQIEGTFKQMDTAGTELECFQALQK  
QEQLAASHRINNLWDEVQKQKELERTLQKRYGDLISEKEKIQHIMDEYRIQAQMQUEE  
NAAKNRALELAKAEAEAVKNQQAPHPVAEAPNDQGDMSVDPAPEGSLDGMAEKQS  
SPPAAVEASLTDVVQVKLTDEVQVKLTDEVQVKPLATGSEAVDSSVSSQCSNAEENSA  
SASQSTVIEVSPTDEVHEKPVDTSSEAVNTIVSSQCSNPEDNSASASQSVASETPPTYDP  
IPS\*

>Peaxi162Scf00137g01812.1

MGRTPCCEKNGLKKGPWTQEEDQKLIDYIQKHGYGNWRVLPKSAGLQRCGKSCRLR

WTNYLRPDIKRGFRSFEEEEETIIQLHSILGNKWSAIAARLPGRTDNEIKNYWNTHIRKK  
LLRMGIDPVTHTPRLDLLEFSSILNPSLYNSSQLKVSRLGQPLVNPEVLRILANSLLS  
SQYTVKPSSELVDQNLLMSRNLQGNQLSNPQAQNLPLVQDISCGPCSNEAQLMQQA  
NLEQFSSNMSNYSSQNCQLNDWQNLQEMPSHLTEDYNYHLHNYGYYQQDQSIMDPPP  
SDASAFQSNDSNVSYQSILSTPSSSPTPLNSNSSYINSTTTEDERESYCSNTFNFDIQNM  
LDANALL\*

>Peaxi162Scf00147g00136.1

MGRAPCCEKVGLKRGRWTAEEDEILTKYIHANGECSWRSLPKNAGLLRCGKSCRLR  
WNYLKTDLKRGNTPEEEAIIIKLRATLGNRWSLIAEHLPGRTDNEIKNYWNSHLSRK  
VESLRIPSDERLPKAVVELAKKGTQQLNKQRRGRVSRSAMQKNRNNLSSTKGTSTAS  
TLSPKQPPKEINTISMPSTPNIEKEVLSSTTTSSGQDASNTHLTSDNYASELDNEMLW  
HEELDPDFIFTCLWNEEGENLETVENNNSHNSNTEILSVNVDMVSPGNSKINETSTLM  
EDGTSLDWDWQYLSEWNEIWAEQEENMSNNNISSRQLSNEALVEIDPVQQVDYNHS  
ELVAWLLS\*

>Peaxi162Scf00160g00722.1

MGRAPCCDKNSVKKGPWSPEEDAKLKAYIEQHGTGCGNWIALPQKIGLKRCGKSCRL  
RWLNLYLRPNIKHGGFSEEDNIILSLYISIGSRTDNDIKNYWNTKLKKKLFGKQRKNL  
KGNNQKQGSRKGREMSSMSMVSNENIIANPSWPPELPILQPIPYSNEEPRFNDHSSIRK  
LLMKLGGKFSDDDDNDDEKPMNEPPSNPQYPMDNSLIQPIYDQDCINMMHSPFTNNTH  
YNMDAKALCWADTDTERRLGERMGSDTPVPTVNDGCNFINLEHMMYTNPQKL  
SGLEMLYVDMLNNKHATTLGGSLDLEDMMNNLVFPLPPLDASNTEGHQHGTLQGA  
LNELRLQAMSHPPCVWLQQPGKGWLSEAIMIRESRVEGLSLNGSK

>Peaxi162Scf00164g00073.1

MDHHHKTKVGLGRRGEDYRTSNVMNQENIREEDIMDLRRGPWTVEEDFTLINFIAH  
HGEGRWNSLARCAGKSCRLRWLNLYLRPDVRRGNITLEEQLLILELHSRWGNRWSKIA  
QHLPGRTDNEIKNYWRTRVQKHAKQLKCDVNSKQFKDTMKYLWMPRLVERIQAAA  
TTAATSTTTNTYIQNLENQQSVPNMSHMSQFLPIQLENHKKTNSINHSSMTLTLENS  
TTTSSDNSIGRQVSPTSDLTDCYYNFSINQSSNNQDYTPFNQNYGESLISATGYFPQAV  
DQQNSQWMDSEYVSDNSWNIEDMWFLQQQLNNNL\*

>Peaxi162Scf00164g00216.1

MAEQMGNWGVIEDEWRKGPWTAEDRLLIEYVNLHGEGRWNSVARLAGLKRNGKS  
CRLRWVNYLRPDLKRGQITPYEERIILELHAIWGNRWSTIARSLPGRTDNEIKNYWRT  
HFKKKVKKSIDNSEKTKARLLKKQQFQQHQQEQLKNQIYMKKVMSLLEGNYENEVP  
ILPQRKQEMDFMYQNTTEQEQGGGFFYSMLNGYATVPVPEVSSNEDMIMWDHGLW  
NLEDVNANFNATAAYNKTLPLCLQPLATPFY\*

>Peaxi162Scf00165g00111.1

MRERQRWRSEEDALLRAYVRQYGPKEWHLVSQRMNTPLNRDAKSCLERWKNYLKP  
GIKKGSLTEDEQRLVIQLQAKHGKWKKIAAEVPGRTAKRLGKWWEVFKEKQQREH  
KENNKVVDPVDEGKYDHILETFAEKIVKERSVPGLLMATSNGGYLHADAPAPSPQAL  
LPPWLSNSTAASTVRSPSPSVTLSPSTVPPTPTPGIPWLQTDGRGPENAPIVLSSPHH  
GIAPPCGENPFVTELVECKELDEGHRAWAAHKKEAAWRLRRVELQLESEKACKVRE  
KMEEIEAKMKALREEQKASLDRIEAEYKEQLAGLRDAEAEQKLAEQWASKHLRL  
AKFLEQMGCQSRLAEPNGGR\*

>Peaxi162Scf00165g00128.1

MDELKVEDCCTENKQSAVASSSSVSENSGSVTLRSPAVSSPTPTSPTHRRTTGPIRRAK  
GGWTPPEIKSPFPQDDTLRRAVAAYRGKCWKKIAEFFPDRSEVQCLHRWQKVLNPEL  
VKGPNWREEDEKIIELVAKYGPTKWSVIARSLPGRIGKQCRERWHNHLDPITKKDAW  
TLEEERALMDAHRHGNKWAEIAKVLPGRTDNAIKNHWNSSLRKKLDFYLATGNLPP  
ATGEGLQNGCRNTDGTAKAEFFLLGSNKRSEAAVSSGITDTCKIENGKKNHYNARLQ  
VAEISASTGGPQTESTDSEVARWDAQSPEIDAIQHIKPSTESEKRYDGRRINSQVQLN  
VIEAPFPCEIPTYGTLTYEPPSLESRSPLDSNLLNICWDQCESDASPSNSSNSFFTPPSTK  
GSSLYAQTPESVLKYAARSFPNTPSILRKRKTQGNFSTLINKMGKTGGDICKDKPTDA  
CEVNRIDSSEKSGMHNEGLPRNFSNGIGLFNSQPFNASPPYRLRSKRTSIFKSVEKQLE  
FAFNNEKKHDTSNGFSDSTDNEISHAVEKATHSPESAS\*

>Peaxi162Scf00166g01118.1

MGRSPCCDKVGLKKGPWTPEEDQKLLAYIEEHGHGGSWRALPAKAGLQRCGKSCRLR  
WTNYLRPDIKRGKFTLQEEQTIIQLHALLGNRWSAIATHLPKRTDNEIKNYWNTHLKK  
RLVKMGIDPVTHKPKNDALLSHDGQSKNAANLSHMAQWESARLEAEARLVRQSKL  
RSNSFQNPLASQELFTCTPSSPLHKPIVTPTKAPGSPRCLDVLKAWNGVWTKPMNDI  
LRADGSTSATVSVNALGLDLESPTSTLSYFENAQQISNGMIQENSTSLFEFVGNSSGSS

EGGIMNEESEEDWKGFNGSSTGHLPEYKDGINENMSLNSTLKDLTMPMDTTWTAES  
LRSNAEDISHGNNFVETFTDLLSTSGDGDGGLSGNGTDSDNNGGSGNDPSETCGDN  
KNYWNSIFNLVNSSPSDSAMF\*

>Peaxi162Scf00170g01335.1

MGRYPCCCKLDNDLKKGPWTAEEDEKLKEYIQGHGHGNWQLVPKRAGLNRCGKSCR  
LRWTNYLRPDIIRGGFSDDEEQMIINLHSV LGNKWSRIA AHLPGRTDNEIKNLWNTHL  
KKKLLKAGIDPVTHQPINDPRLLLSLSNLMNPLESVLRLQAEVTEMAKIH LIQNIQVL  
TPPLIPNLQENNFPMQQLYNLALYENIVTNVTHIDEPSISNSSDMLLSPSVVENNITGF  
SNVSNVNSEHSLPSLVEATPENS PSEQNDIIPNYFGSFSETKDFDAWEKSLDDEASNSF  
WQDIL\*

>Peaxi162Scf00170g01336.1

MGRYPCCCKDDEDLKKGPWAPDEDEKLMDYINKHGHTNWQLLPKKAGLNRCGKSCR  
LRWSNYLKPDIKRGKFSIEEEE MIINLHSL LGNKWSRIA AHLPGRTDNEIKNFYNTHLR  
KKLLRLGIDPRTHKPISDLNYLINLSQSFTSNNNNHLMNNPLASVLRLQAEVTEMAKI  
QQYLQGLFLPPINTNIPFYSSNIQENFARYSSHLPPELGHVTNTNTQFLDSWLVDCA  
KSPNLDNSTSCISNSSQSYHQGELNSKVDNFEGLNSSSKTYNDYSNSLPVLAPSSPEAA  
H

>Peaxi162Scf00171g00047.1

MCSRGHWRPHEDEKLRELVAKYGPHNWN AIAENLQGRSGKSCRLRWYNQLDPRINR  
SPFTEEEEERLLASHRIHG NRWAIARLFPGRTDNAVKNHWHVIMSRRCRERSKIYSM  
RNINNSAQNSTTSPQDTSQNTRRGSPNMNSIDQQLGRFNYYPNLTFNNSLYPKELYF  
DHLRHHLKINEDKNQEVECYDFLRVNTGSNKSEVIDHIARKGTDDEEVEQEAGYHYP  
AQSKAPVQFIDFLSVGDSS\*

>Peaxi162Scf00177g00512.1

MGRRPCCSKEGLNKGAWTPMEDKILIDYIKVHGEGKWRNLPPKKAGLKRCGKSCRLR  
WLNLYLRPDIKRGNITRDEEDLIIRLHKLLGNRWSLIAGRLPGRTDNEIKNYWNTNIGK  
KLQHQRAAANS GHAKSRPPVTTQDIVGSGSSLSSASPCLVVRTKAMRCTKVFIPTPK  
NTSHDNSITTNCNND DDDKVMAVETTALVASSSSSFTLSSILSEQQPISGSSPVSLSGDQ  
FMENSFNFMFNFDMDDPFLSELLNAAENTTTIGGDQVGDSFNRNEKERSYFPPSSSQS  
ALFSEETQHNDLELWINGFSS\*

>Peaxi162Scf00191g01323.1

MGRTPCCDKKGLKKGPWTPPEEDEKLVEYIKKHGHTSWRSLPNLAGLDRCGKSCRLR  
WTNYLRPDIKRGPFSSQEEELVLIQLHGILGNRWAAIASQLPGRTDNEIKNLWNTHLKK  
RLLSMGIDPQTHQPSTAPNGLLRPPTSSSARHMAQWEKARLEAEARLSREPQLLVPS  
LVGKSETDYFLRIWNSGIGEAFRKLLKKEEKTTCQSPASQESSSTKYGSDSGITTEIDL  
LAGSPAAGSNQNEDETKWKNAQPYTENFLQGSSTSSSSGLEDSSSESALQLLLDFPSPAA  
ERLCILTPLEV

>Peaxi162Scf00194g00218.1

MGRHSCCYKQKLRKGLWSPEEDEKLVKHITKYGHGCWSSVPKLAGLQRCGKSCRLR  
WINYLRPDLKRGTFSSQEEENLIVELHAVLGNKWSQIAARLPGRTDNEIKNLWNSSIKK  
KLRQKGIDPNTHKPLSEVENEEKASANSNKNNEKVISEDSNDQLNFIEAHESISKHIGI  
ATEKSSTLSTMTNNMDRYPLIHETNNIVPPTHEFFTKSPHDLASYFSFQQLNNYSPNSI  
GLSMTNSNTNNLIFNNSTNSKNSHDMVSDQFNSCTMATDPEEIKWSEYMQTPYLLSA  
NHHQMSQHGDLYGDAKSEAQFITQGSLNLSNTTWLHQSQQQQSSLQTADLYNKNFQ  
RLPAAYGQYS

>Peaxi162Scf00203g01315.1

MKTC AVRDSDEKDKGMGHHCCSKQKV KRG LWSPEEDEKLVRHITTHGHGCWSSVP  
KLAGLQRCGKSCRLRWINYLRPDLRRGSFTEQEERTIIDVHRILGNRWAQIAKHLPGR  
TDNEVKNFWNSCIKKLIAQGLDPNTHNLLSTHQNKNNKTNNSSKTKSYHQDSTSVF  
TIDTSTNKEVISMDIKATLAALPPFLHSNNNTSSSTYHYTTPIVPIIEYQNPSTFTLSERN  
NGSTTTQHSVLDFASNTSINSTNNVSSSTLTPLFEGYINENCMWAGTGLEPTTLNPAT  
GGTEEMQVQLQGEQFPITKFCQEDVYKVNQTVENTFDNSNFD FDFVDSALVPCGL  
YNSVNSMDQLSWDC\*

>Peaxi162Scf00222g00521.1

MTSYSCSPMGTTTTTTTTSMGMFYADMNSLSITSINYVTS DGGVGENSNETIDLNASCCF  
NEEKQITMHSNFFSGNNGKEIESGQSKLCARGHWRPAEDAKLKLVAIYGPQNWNL  
ADKLRFNQLDPRINRRAFTEEEEEERLMAAHRLYGNKWAMIARLPGRTDNAVKNH  
WHVIMARKYREQSSAYRRRKMGQFVYRRTTTSLVEEEDSSFVSSNSSSGKEVVAATM  
KGENPTPIISGQTAANPFASLKINNDGPSGWVVYGPNGSSHMAASAGEAAPPSTNVIV  
GMK\*

>Peaxi162Scf00222g00715.1

MGKSKCCDKEGLKKGWTPPEEDQKLLLRWINYLRPDIKRGKFSLQEERTIIQLHALLG  
NRWSAMAAYLPSRTDNEIKNYWNSRLKKRLTKMGIDPMTHKPKTDNGNSSQSKYVA  
NLSHMAQWESARLEAEARLVRRSKDSKMLFNNTNHNQITSQPYYQLPCLDILKAW  
QRSSTKPTTNDINAILLDGNFATRNXSLESSIPSTSNNFSGNVVMNNVITTTTTTTTTTVG  
DNLPLSSINCMEDELCPSNFMQEFSELFPEYNTCAQNPENYSTGQLDNFMGGCFLDFE  
DNKYFNWNNFSLVTSPPVGPVF\*

>Peaxi162Scf00222g00821.1

MGKSKCCDKEGLKKGWTPPEEDQKLLSCIEEHGCGSWRALPAKAGKFSLQEERTIIQ  
LHALLGNRWSAIAAYLPSRTDNEIKNYWNSRLKKRLTKMGIDPMTHKPKTDNGNSSQ  
SKYVANLSHMAQWESARLEAEARLVRRSKDSKMLFNNTNHNQITSQPYYQLPCLDI  
LKAWQRSSTKPTTNDINAILLDGNFATRKNLLESSIPSTSNNFSGNVVMNNVITTTTTT  
TVGDNLPLSSINCMEDELCPSNFMQEFSELFPEYNTGQLDNFMGGCSLDFEDNKYFS  
WNNFSLVTSPPVGP

>Peaxi162Scf00228g00914.1

MDHHHHVKVGSSHGGGANCNNQQQHDEDMDLRRGPWTVEEDFALMNYIAHH  
GEGRWNSLARCAGLKRTGKSCRLRWLNYLRPDVRRGNITLLEQLLILELHSRWGNR  
WSKIAQHLPGRTDNEIKNYWRTRVQKHAKQLKCDVNSKQFKDTMRYLWMPRLVERI  
QAAAANNTNSNNPSKSQMVHQTINSNMSGMSEFVPIHDNVVSTNKPRLMSTENSST  
AAASSENSFGTQVSPVNSDLTDCCYNPPVNQDYFQVSHHQSTTNNDQLCHGESLTS  
PTGYFHHGTGLDQFQGMDDQQNMNSSQWMDGGNNFSDSLWNIDDMWFLQQQLNN  
NNNNIV\*

>Peaxi162Scf00268g00046.1

MGRSPCCEKAHTNKGAWTKEEDQRLINYIRAHGEGLLRCGKSCRLRWINYLRPDLK  
RGNFTEEEDDLIIKLHSLLGKWSVIAGRPLPGRTDNEIKNYWNTHIKRKLISHGIDPQT  
HRPLNAAANPAATTTITTNTTKNICMDFRNNVDQKPHINIINKTNATDSSNNETKCSSV  
TTEETQPLELPKKNTQVMINLELSIGLPFHAKT DHIYSSNSAESTAPYNFLAAAAAPP  
TVAAPVVMAMELVAETACLCWQIGFQGGQSCGKCKTTTGfYRFC\*

>Peaxi162Scf00269g00088.1

MGRSPCCDKNGLKKGWTPPEEDHKLIQYIQVHGPGNWRNLPKNAGLQRCGKSCRLR

WTNYLRPDIRRGFRFSFEEEEETHQLHSVLGNKTDNEIKNYWNTHIRKRLLRMGIDPVT  
HSPRLDFLDLSSLLNSTQLNLSSLLGLQALVNPEILKLANTLFLPHSENQELLLLKLQE  
NQLLNPPQHIQNSEGPEMLLQKLLQSQLVNSPLHNQSSIFQHNTNQIHNQIPEIPNCTQQ  
NVSCSSSQSMQGNMGRYLMNGQIFQENMMLPPQNYSHSTSTPDASENSTFQSLNNSN  
QNSQNFSDTPLSGTEEEKESYCSNFMKFEIPESLDFDDL\*

>Peaxi162Scf00273g00087.1

FKFHPKDPKKANVIVCALGNICRHWQSLLLVSLLLLLAIELCTLSVSLAFLDAVSTLKG  
PEERNILLQCGKSCCLRWWTNYLRPDIKRGPFSEEEKLIQLHGILGNRWAAVASQLPG  
RTDNEIKNLWNTHLKKRLFSMGIDPHTHEPSSVPSGLVRRPPTSSSTRHMAQWGSARL  
QAEARLKIHFRL

>Peaxi162Scf00274g00625.1

MGRPPCCDKIGVKKGPWTPEEDIILVSYIQQHGPGNWRAVPTNTGLLRCSKSCRLRW  
TNYLRPGIKRGNFTEHEEKMIHLQALLGNRWAAIASYLPQRTDNDIKNYWNTHLRK  
KLKKLQGNDDENSSSTSQEGISSNISKGKWERRLQTDIHMAKKALCEALSLDKPIAN  
PTQTPVQESVQPCTTYASSAENISRLQNWMKNSPKSSQLSQSNSESTTTQSSSYNNFS  
MGQVGSSSSPSEGTVATPEGFDSLFSFNSSSVDEGNAAIFQVDSKPNLPNLNAANGF  
FLEESKPTLESQVPLTLLEKWLFDDAINAPAQEELMGIGMGMALGEAADLF\*

>Peaxi162Scf00276g00412.1

MERRTSGPKRRSRQWNAEEILLAAECFNDRTDVQCLHRWQKVLDPELVKGSWTKEE  
DEILIELVNTYGAKKWSTVAQHLAGRIGKQCRERWHNHLNPAINKEAWTQEEELALI  
RAHQIYGNKWAELSKVLLGRTDNAIKNHWNSSVKKKLDYSYWASGLLAQFPSLSNIN  
HQSQSIPSSSMKLLHNSDDESVDGIVKEEVSECSQGSPLAGCSHCTSDWGNTFVHI  
RENDRMSEESLNKNNASSSAAPCSRNYTPDFHDVSCSLPEVPTELEDSKFLEHNYSHD  
LGNSIGKDWQFNREDIPNISLEVIQESSGLFTHLLNCNENHNMPFPLQTLTGFGTANA  
GNVVEGYPYRPNEMFSSVDGCRHHPEEGISQCSPYETGVNGNGAPEDSLIYQSSNDLIL  
ETRDMAPQNCNASSLHDFEASRHQAFSVHSQFSSSENRSIVFGIASNHPLISPLENIQES  
FTSGCDGFIYPSESAAPADNGTDNSFLADRLDHTNDSCRLVSVNDLGSTTSNTVQKG  
MLNENTFVPEEQKDGGALCYEPPRFPPLDVPFLSCDLIQSGSDTQQEYSPLGIRQLMM  
ASANCLTPLRLWDSPSRDDSPDAILKSAAKTFTWTPSILKKRHRHLVTPLEKRCEKRL  
EKDFNQESFSIMTAEFSRPQDMFDQSANEKASTEDKENGHPSSSEAGRKEEGDGVGTGL



SCCGNSERRLDGGAHYRKEPHGKSAGANDGIGNVKQPPGVLVELSSNDLFFSPDRVL  
VKCDRATSLSNKALANHYARRLEAASKQVTVSSSFETSCSSVGCSPAVHGKCRSSFVI  
ATSTALENTAENSENGFRAETESIFGETPFKRSIESPSAWNSPWFMSFLRSRPRCEVELA  
FEDIALFMSPGDRSYDAIGLMKQLSEQTAASIADAHQILGNDTPETILLQTNSKKQKA  
DENCSSLTSNAVSERRTLDFSECGGTPPAKKGKGTTFDSTGTSFSSPSSYLLKCCR\*

>Peaxi162Scf00284g00077.1

MEGTTGDKIKGSWSPEEDNMLIKLVDQHGPRNWSLISTGIPGRSGKSCRLRWCNQLS  
PTVQHRPFTPSEDAIIQAHALHGNRWATIARLLPGRTDNAIKNHWNSTLRRKRHGPP  
LSRSGSSSDQSNSKRHCTRASQEQSSCGLDCDDLGLDGPNGLDGDELGLYGPETSLTL  
SLPGGGSIDSPMKEDVPVKESEPLMNSDNKVKEEKRTVEIEETCLVTIMQRMIAHEVR  
CYIDKLRAQGGLGIGPGVEFEVPPKNP\*

>Peaxi162Scf00295g01125.1

MGRSPCCDESLKKGPWTPEEDQKLNTYINKHGHGSWRALPKLAGRTDNEIKNFWN  
THLKKKLIQMGYDPMTHRPRTDIFDSLQQLIALAKLKEHHSWEEQAMRLQSEVA  
KLNYLQNFLQPHNTSFNAIQDIEAYNLLNSLSSFKDSLVLGTNNHLQIPTISTSSSLQAI  
QDSIPFSHLPELQTPRSNFKTSLNKDSVRPQNTFNVMSHGETSPTSPWLTSSLSPSPPP  
PVINDETKNENSLEVMISSCLPEERKLSDFHLPQNNERSLSNEGAPPSVWPDLLLEDSF  
FQDIVKF\*

>Peaxi162Scf00304g00074.1

MKVLIKGGVWKNTEDEVLKALVMKYGKNHWARISSLLVHKTAQCKARWYEWLD  
PSIKKIEWTRKEDEKLLHLANLMPSQWRTIAPVVGHTPSQCLVRYEKLDDNENYDL  
SDDDPRLRPGEIDPNPESRPACPDPMEEDEKEMLFEEAWARLANARGKKAKRKS  
EKQQLLEEARRLASLQERRELRAAGLIDVHQKRKRSGIDYNAEIPFEKKPPPGFYDVT  
DEECTVGLQPKFPYTIEELEGERRVDKEARLR\*

>Peaxi162Scf00304g00919.1

MVLLAAAMKNMQEPYDKNVGLNSNKGAWSPPEEDQKLISYIMKYRIWNWNQIPKFA  
DLKRGPFMEEVETIIRMYQSLGNRWSAISKELPGRTDNEIKNFFHHLKKQFGTKVN  
DHVQVKRKASCKKSKKAKELEMRTGETQEKPNQSLDMSSSDITFDENHNWDFTNF  
SETSSSEDNYCTVNSLVNQEAVPIIDSMVILESNPTTSENHDLYVQDFMDETGINSSNKL  
HNKNMGTSNKKGPWSPEEDLKLTSYIMKYRIWNWNQMPKFAGLSRTGKSCRLRWV

NYLRPDLKRGPFMSMEEVETVIRMYQSLGNRWSAISKELPGRTDNEIKNFFHHTLKKQF  
GTKVNDHVQVKRKATCKKSKKAKELEMTRGETQEKPQNQSLDMSSSDITFDENHNW  
DFANFSETSSSEDNYCVNSLGAVPIIDSMVILESNPTTSEDPDFSVQDFRDETSINSSNVD  
FWLELYMAAENLA

>Peaxi162Scf00304g01018.1

MQKLHNKNMGTNSKKGPWSPEEDQKLTSYIMKYRIWNWNQMPKFAGLSRTGKSCR  
LRWVNYLRPDLKRGPFMSMEEVETVIRMYQSLGNRWSAISKELPGRTDNEIKNFFHHT  
LKKQFGTKVNDHVQVKRKATCKKSKKAKELEMTRGETQEKPQNQSLDMSSSDITFD  
ENHNWDFANFSETSSSEDNYCVNSLGAVPIIDSMVILESNPTTSEDPDFSVQDFRDETSI  
NSSNVD FWLELYMAAENLAG\*

>Peaxi162Scf00305g00045.1

MGRQPCCDKVGLKKGPWTADEDKKLINFILSNGQCCWRAVPKLAVILDDGIGAGLLR  
CGKSCRLRWTNYLRPDLKRGLLSEYEEKMVIDLHAQLGNRWSKIASHLPGRTDNEIK  
NHWNTHIKKLKKMGIDPVTHKPLSTITNDHPNKQQPKDLPVIQQENLQEIIMPSSV  
NDVSEMDIETPIEQSAISEIKVEEDNNNKNMETTSCKNNINISFDSTTVEVNNNGFCTD  
EVPLIEPHEILVPNSESTPSTSSSSLSTSSSSSSSILEDLKFLPSFDEWPSDYNNMEQNNM  
GLGWENDFSSTLD FLLNDDNDINQFPRDDESWKFDQLL\*

>Peaxi162Scf00311g01112.1

MGRAPCCDKENVKRGPSPEEDATLKSIEKHGIGGNWIALPQKAGLRRCGKSCRL  
RWLNLYLRPNIKHGEFSDEEDRIICSLYANIGSRWSIIAAQLPGRTDNDIKNYWNTKLKK  
KLMALDLSSQQISPNYQSTPTYHSSISALQSSSHNSSLYSSPSPSLSLKSTAYKYTNSHF  
YPISTATNFPCNETIISPPSSKFLNSPSYMYNGVEEKQSNSKFLITNGNDYAEKKPKGKG  
CYDGENSLECSLEEIKKLITTSIHDNNFNFFSDENKIEEQVMMSTDVDHN\*

>Peaxi162Scf00330g00418.1

MDELMKLEGCC TENKQSTAAMSSSVSENSGSLTVKSLEVCSPTPTSPAHRRTGPIRR  
AKGGWTPEEEEKKSWLCLTTDAYAAEFFTD RSEVQCLHRWQKVLNPELVKGPWTQE  
AGFSFPLYQSEDDKIIELVAKYGPIKWSVIAKSLPGRIGKQCRERWHNHLNPNIRKDA  
WTLEEEELALVNAHRVYGNKWAEIAKVLPGRTDNSIKNHWNSSLKKKLD FYLATGNL  
PPVARDVLQNGCKDTVKTASAEKALVCSHKGSDSTEVASSGTTDVCKLENGDKNHQ  
DTKLLVANIGASISGPQNGSDSEVVRWEAESPVIDTIHVKPITQIRFEGYGINSEVDQFK

VIETPFSCEIPTCGTLYYEPPQLGSCISVDSDDLNRSLRCESDASPSLSPSSFSTPSSLKG  
SSLYAQTPESILKIAARSFPNTPSIFRKRKLSSTSSNKIGNADGDTSKDEVHDACEEKQT  
DSSEKYGMHRESSSRNPSYNGIGPCNTKAFNASPPYRLRSKRKSIFKSVEKRLKFAFD  
NEQPDSTGISDSAAKETSQVAKD\*

>Peaxi162Scf00342g00113.1

MSITSETDDWMTSKVDMDSPDEANGGGNVGGSLPLKKGPWTS AEDAILVEYVMKH  
GEGNWNNAVQKHSGLARCGKSCRLRWANHLRPDLKKGAFTLEERLHIELHAKMGNK  
WARMAAELPGRTDNEIKNYWNTRIKRLQRAGLPVYPPDICFLASQNKQNEELAGLSS  
TDAQHPGLVATNNFDIPPVEFKNLELNQLLCPAHVEIPASSLLDIPASGFLAQVHSAPY  
SSTSLLSTVHPSKRIRGSESMFSGSNGDLFLASCQYQNGGSLIAQPLGFSSYNHNLT YD  
GQQSFSNVIPGSHAPLNGNSSTSEPTWALKVELPSLQNQTANWDSPSSPLHSLESVD T  
LIQSPLAGHSESVLSPRNSGLLDAVLYGSQTMNSSKDNSNQAKEETSADAVGNSCPD  
LLEKGWETYGDPISPLSRLPASVFTECTPTTGNSLHELQSTSRMPGENGCNVKQENAD  
QAPSDGKDDMLNQTFASNCSSPKTQHTKNNLALKNAFGSGFFDDYGWDCKQVHSV  
ATSSGQACGRDSAWDAMSAM\*

>Peaxi162Scf00349g00057.1

MRTPSSSSTTSNKVTPCCSKVGLKRGPWTPEEDEILTNYINKEGEGRWRTL PKKAGLL  
RCGKSCRLRW MNYL RPSVKRGHIAPDEEDLILRLHRL LGNRWSLIAGRIPGRTDNEIK  
NYWNTHLSKKLISHGIDPRTHKPLKNSNSSSDDITNKLASSPSSSKANDLN PILSPTY  
ISSFQMEEPLGKINTHPGEITSLDDQYQSNAILAEYGDDLNI AVTIEEDVEMNCCTDDV  
FSSFLNSLINEDMFACQNQQTNGTFQDFDPFMASSSTPSSDQYNPS\*

>Peaxi162Scf00354g00068.1

MFSGLKRCGKSCRLRWLN YLRPDIKHGGFTEEDNIILTYTQIGSSSILVKIRWSVIAS  
NLQGRTDNDVKNYWNTKLKKKLL EAAATNTLSNSNAFTHDKTYMNTIPRTC YGTDS  
TNCNSMKFYTF SHAMDTNLLGHSSRQLFP LLPELMEIQENGILQQAEEVKCSSLENSF  
ASFSGNIGVVQGNEEDGSLMSLSSGISSYYYDLLNGFN FQENVVMGVNTNFSNYSS  
NSNLLQLQANIPDSTDQPFKGFETY\*

>Peaxi162Scf00362g00831.1

MGRSPCCEKAHTNKGAWTKEEDERLIAYIRTHGEGCW RSLPKAAGLLRCGKSCRLR  
WNYL RPD LKRG NFTDEEDELIIKLHSL LGNKWSLIAGRLPGRTDNEIKNYWNTHIRR

KLMSRGIDPTTHRAINESSTTTQKVTTISFGAGNKNKDIEDLKMINVKAESGLSQEDE  
NSSSSQLFQECPDLNLELRISPPYQQNQPDHQALKQSPTRGHLCFACSLGIQNSNDC  
NCSNGCSTNMGMNIASYDFLGLKANGVLDYRTLETTK\*

>Peaxi162Scf00371g00087.1

MGRTPCCDKNGLKKGPWTAEDQKLIDYIQKHGSGNWRTL PKNAGLQRCGKSCRLR  
WSNYLRPDIKRGKFSFEEEEETIIQLHSILGNKWSAIAARLPGRTDNEIKNYWNTNIRKK  
LLRMGIDPVT HSPRLDLLDLTSIFNPSLYNP SHMNNMSKLLGVQPLL NPEILRLAT SLL  
SSQRQNNQNFLLPSNFQENQSCDSQVQNQMTPFVQASQIQIPIQNISICTPLSTPCVPFSS  
EAQVMQQPNMEQFPSNLSYFSAQNCQQNEWQLNNGIASKMNEHNFPSQNYVFSTLS  
TPSSSPASFNSNSTCINSSSTTSEGERESYSSSMLNFDIPNIFDVNEFL\*

>Peaxi162Scf00377g00925.1

MSEIIKKGPWKEEEDAVLIKHVKKYGPRDWSSIRSKG LLQRTGKSCRLRWVNKL RPN  
LKNGVKFSAEEERTVIELQAQFGNKWARIATYLPGRTDNDVKNFWSSRQKRLAKILR  
NSASQPSKPQKDNKEAPALQKVPSVEEPKLSSPAEERSLPMSQCCSSSYMNSDTIN  
MVPLPELENSTSLPFEPNLLQFEFTPNDKNYQYIGTQTSLSFPQIPLQTD FGHPLGSQEL  
PMKLEETDFLDFFGQLSTASDIGNVQVPLVPLCSGPDKSSEIVVKREMDSPLTQDSFID  
DFPMDVFDLIDPLPSPSD

>Peaxi162Scf00391g00621.1

MGRSPCCEKAHTNKGAWTKEEDQRLINYIRTHGEGCWRS LPAAGLQRCGKSCRLR  
WINYLRPDLKRGNFTEEEDELIHKLHSL LGNKWSVIAGRLPGRTDNEIKNYWNTHIKR  
KLISRGLDPQTHRPLNSTITTNTTSTKNICLDFRKNTSIAATPLSQNDQKPMSSSISLE  
DTKCNSSTTEE VQPLDSPPAAPV TGEV MINLELSIGLPIFQAKMTDQSSSISNSAKEM  
GGKTVCLCWQVGSQNGQQFC

>Peaxi162Scf00411g00008.1

MVQEEVRRGPWTEQEDLQLVFYVKLFGDRRWDFLAKVSGLKRTGKSCRLRWVNYL  
NPDLKRGKMTPQEERLVLELHAKWGNRWSRIARKIPGRTDNEIKNYWRTHMRKKAQ  
EQRKKTCVSPSSSFNCSSSSSITHEENERNFYDTGGLELLQSADGQKKVSGHEKGES  
MKVYSMDEIWKDIELSEENDTITSNKL PVMANVSPLWDYCPASLWISDEEESKMFP PF  
SEHVDDHLQVYSFDKKNRTF\*

>Peaxi162Scf00420g00240.1

MGRQPCCDRVGLKRGPTIEEDHKLVNFLNNGIQCWRTVPKLAGLQRCGKSCRLR  
WINYLRPDLKRGTLSEDEEDQIIQLHARLGNRWSKIASNFPGRTDNEIKNHNWNTRIKK  
RLKLMGIDPLTHKPLEPIDHKKYKHQPDDHRTELSRTENSNFDNANND FSVPNDEYN  
NMLCGNLEVELWNKSCKTMSSVTCYSSSTSLDADDSINLSTVSAATTESSSNLAPVED  
QQDSIQQWMDSLFSCSVNQLEDDMFFLRKYN\*

>Peaxi162Scf00428g00117.1

MRKPEHGSVMKEKGNNNNKAKLRKGLWSPEEDEKLMNYMLTNGQGCWSDIARNA  
GLQRCGKSCRLRWINYLRPDLKRGAFSPQEEELIVHLHSILGNRWSQIAARLPGRTDN  
EIKNFWNSTIKRLKNNNNNNNNNNSSNNNTSPNTSDSSSDLRVLMGGSIFPMQGH  
DVNVMAGLCMDNSSSTTSASSLQAIVPNNHFNPFQLDSTNYDIIIGAAGLYNLPPCLG  
QFGSSSGHDGGVVDYGVVEAYSSMGLGSDFSVPPLESGNKGTMGENSENIVNFSSNVS  
AVNDYSLFDKKTNGNNQQLMSDSSDQSLKVEDYMGVFGNSHHHHWHGESLRIGEF  
DWEGLLANVSSLPYLDVFQVE\*

>Peaxi162Scf00451g00059.1

MGRSPCCDKVGLKKGPWTPEEDQKLLAYIEQHGHGSWRALPIKAASSSITYTAYGFD  
DLQFVGLQRCGKSCRLRWNTNYLRPDIKRGKFTQQEEQTIIQLHALLGNRWSAIATHLF  
KRTDNEIKNYWNTHLKKRLTKMGIDPVTHKPMNDTLLSTNDNVQSKNSANLSHIAQ  
WESARLEAEARLVKQSKFHSYKLDTPRTSTFFDHYSSQELLTPSSSSSHLKNLMPVTS  
GLQDFNFVERSTGFLLECTSADGNLSSGGMDSDSSGNASEQCEDNNYWN SILD LVNSS  
PTESTMF\*

>Peaxi162Scf00452g00412.1

MGKGRAPCCDKSKVKKGPWSSEEDLRLITFIQKHGHGNWRSLPKQAGLLRCGKSCR  
LRWINYLRPDVKRGNFTPQEEATIVKLHQSFGNKWSKIASYLPGRTDNEIKNVWNTH  
LKKRLMKKIDGNQAKDGRSCVSPPFSPSSSTSVVSHTNWSQDISTKANEVEFKDDML  
AEKEPKEATKSCSPTTSYGSNLSNLSQVEISSPKGLDMDNWILSPKVHDIHDDGVIEIP  
SMESDIDFWDMLDILDPSPTTTTTTNSDSKQDNQPVCQGVSDSECQKWLRYLENEL  
GLSQSTGANCYECTDAVTSQDKEAHPFTT\*

>Peaxi162Scf00485g00916.1

MGRSPITSDKSGLKKGPTPEEDLKLIIQYIEVHGPNGWRSLPKNAGLQRCGKSCRLR  
WTNYLRPDIKGRGFSFEEEEETIIQLHSVLGNKWSAIAARLPGRTDNEIKNYWNTHIRK

RLLRMGLDPVTHSPRLDLLDLSSLFNSTQNLSSLGLQALVNPQFLRLATTLTSHTE  
NNQEMLLQRLQANPTV\*

>Peaxi162Scf00503g00613.1

MQNLKKSGNSSGDVAAAKPKERHIVSWSQEEDDILREQIRIHGTDNWTIIASKFKDKT  
TRQCRRRWFTYLNSDFKKGGWSPEEDMLLCEAQKIFGNRWTEIAKVVSGRDNAVK  
NRFTTLCKKRAKHEALAKENSNSFINLNNKRVIKPDGLSIDKITEAAAPIKKLRMSGVS  
DVPQDGSSKGNISFGDCGTHPLLRHPFAVLAQNFHNAAGNLASHQQVNNMKESTEN  
ATDSKTQGTFLKKDDPKIHALMQQAELLSSLAMKVNTENTDQSLENAWKILQDFLH  
QTKEGDMKFQLPEMNIDLDDYKDLMADSRSSNEGSRPWRQPALSEDSAGSSEYST  
GSTLLSHALADKTEESQAEGCAHLQDIESELNSQMSDQGGIHESENGTSCRVSTTPD  
TLPVCDEEKANNGPATAECEFLNTDFSSPLQVTPLFRSLAETIPTPKFSESERQFLLKTL  
GMESITPHPGTNLSQPPSCKRALLHSL\*

>Peaxi162Scf00515g00013.1

MAFQLTMQEEELRKGSWHEEEDERLASIVAILGERRWDALAKASGLRRSGKSCRLR  
WMNYLRPNLKHGYITADEEHLIVKLQKQLGNKWSKIAKQLPGRTDNEIKNHWRSHL  
RKKSLEYEQECCGSNTSKSGQISSASKSDSINTPNNSTGDSISGKDDCSSADSNETGLSD  
WIPSWSYEQSQMEHHMYLCRLNLCFCHPQCFSEDNNISTWGDTSSSIWEQ\*

>Peaxi162Scf00516g00673.1

MGRSAESDDMSGGLKKGPWTPEEDQQLLDYIHKNGHGNWRALPKLAGLNRCKGSCR  
LRWTNYLRPDIKRGKFSEDEERLIKLHSLLGNKWSAIAIRLPGRTDNEIKNYWNTHL  
RKLLQMGIDPVTHRPRTDHINIFNALIGNIPPQLLAAASSNFMNTDNTSINNLTNILFS  
DTAQQLVHQIQLLQNSSSLVHSLFNNAATSTACPLNMEGLNQNFGLQNLCDQNQLQ  
EYNSILMNYQQFLSNTSDSLTGFAFNSSNSTDISATNGCDQLMVMSGTCSTSSSCGNN  
AASVTHANDDQMKNISKAAALHHDTPCEPSSSNKMPQGNMISDIYPKQELVQPSSASM  
STFEPWGQIMGDEEASDSYWRDIE\*

>Peaxi162Scf00521g00814.1

MADKGQSSSSVNTPADSQDVVAPRMLVSGKTSKVAEIEFSEEEEDLIIRMYNLVGERW  
SLIAGRIPGRSAEEIEKYWNTRSSTSQ\*

>Peaxi162Scf00523g00004.1

MNRLFESDSVKFSKYSNSLWNLSSGANFNRRTS GPTRRSTKGQWTPEEDEILRKAV

QRFKGNWKKIAECFKDRTDVQCLHRWQKVLNPELVKGPWSKEEDEVIVELVKKYG  
PKKWSTIAQHLPGRIGKQCRERWHNHLNPSINKEAWTQEEELTLIRAHQIYGNKWAE  
LTKYLPGRTDNSIKNHNWSSVKKKLD SYLASGLLAQFPALPNVNHQNSIPSSVKLQ  
QSSEDDSVRKEGTEMEEVSECSQGSNLAGCSQSTSDMGNRFVHTREDRKLLLED SNYR  
MDPSSSSAPCSEYYTPAFDDITFSMEEVPSELSESKFLEQNL SHDWRTSMGKDWQFNP  
DDDIPDISPLELMQESSGLFMQCLTGNGNHDMVTFPQKNAMSF GTTTNMGGMVVGL  
DKPTMFTSVDDCRMVYPEAGIPQCFPSETGMNGVDETADSLIYQSSNYQISEADMSI  
EKCNP LCSDVMGSQPFSVPSQFSSEQSSSMFGTVSNQFHDLSHG NPALESHTSKCDAF  
LYPVESGTPCDNIMNDPLLKEQLHQTEDSVQLVSVNDFSSTPPSTLQTRPLVNENLPVP  
EEQKDAGALCYEPPRFP SLDVPPFFSCDLIQSGTDAQQEYSPLGIRQLMMSSVNCLTPFR  
LWDSPSRDGSPDALLRSAAKTFTSTPSILKKRHRDLVSPLSEKRCEKKLESDFRREAFS  
DLARDFSRLDVMVDESANEKATISSATADQALELRASSEDKENISPTEDGRKEEDKGH  
NGLLSSGT SERQLDGADVHYKEHGTREGKRVGANDAKGKIKQPSGVLVELNTSDLFF  
SPDRFGAKSDRATNLSNKALGNQYARRLEAASNQGSVSSSFETSCLSVICSPRIRGKK  
DGSSFIITTSMQSATTSTALDNSAETSGNGVGAETVNISGETPYKRSFESPSAWKSPWFI  
NSFMSSPRLDTELT FEDLALFLSPGERSYDAIGLMKQLSEQTAGAFADAQEV LGGETP  
ESIIRGRNSKNQKANENHSLLSANAVSERRTLDFSECGSPGKGKDAENFCTNDRSFSSP  
SSYLLKGCR\*

>Peaxi162Scf00526g00820.1

MVAIKIRRDKDMSMSSESDDMMTSKVGVDSPSVEEACGGGNTGGGLPLKKGPW TSA  
EDAILVDYVTKHGE GNWNAVQKHSGLARCGKSCRLRWANHLRPDLKKGAFTPEEER  
RIIELHAKMGNKWARMAAELPGRTDNEIKNYWNTRIKRRQRAGLPVYPPDICFQAISE  
SKQNE DLGTFSTDGQYSDFLPVNNYEIPAVEFEKKLEFNEPLCPPSLLDIPAGSLLDIPAR  
SLLAQGLNSAYYSRSLSTMHPSKRIRGSESLFSALNGDSSPLKNEDSFPTCHQYQND  
GTLLAQSLGFSSPYNQNP TSDHHPSSLGVPGSHAPLNGNSSSSEPSWAKKLELPSLQSQ  
MASWGLPPSPLPSLESVD TMIQSPTEHTESCNLSPRNSGLLDVLYESQTM RASKDN  
LHQENSGDGADDSCPD LHETWEAYGDPISPLGHSAASEKFDGKDDTLNPF FSRPDY  
LLESNCFSPMQS

>Peaxi162Scf00540g00619.1

GASAFHPYQNLPKNNLHGLHPNLPLTAIDRFLLGHENYFSPLSGANATSSHANEVSWP

TLEPSFMELGYFLHEQSAINYMDDHQENIMIVEAESSQTNKKESVKKAKEGYSTTNLI  
KGQWTDEEDRKLLRLVKQFGVRKWAQIAEKMEARGGKQCRERWHNHLRPDIKKDS  
WSEEEELMLVEAHKQLGNRWAEIAKRIPGRTENSIKNHWNATKRRQNSRRNKNRKN  
PQVGQNEGKHRSNVLQDYIRSKYFNDDSSSTTTSHKEFLHYQTNITPTNSTTTNATP  
SYSNDDSTSLTHQTYDEELQFMQNLFGKNSILDNNGAKAIDHSMEDKVTQNLFDNN  
NSSSSFSAFSSLD FSSDPLASETNITTKRVIHDAENYMNDYYKESTIHCPDLYLSYLLD  
ASTYSSMPFAEASGYGSMNMGMLMNQGSCSSGNNKEVDFMEMASSNSQFSQGNFT  
KPFF\*

>Peaxi162Scf00543g00414.1

SFKEARSASKQSKGKMGRAPCCEKMGLKKGPWTPPEEDQILVSYIEKNGHGNWRALP  
KLAGLLRCGKSCRLRWTNYLRPDIKRGNFTREEEDTIIQLHEMLGNRWSAIAARLPGR  
TDNEIKNVWHHLKRLKKNYQPPQNSKRHSKNNHDSKAPSTSKMLDNSESFSTIQEN  
INEPMTGPNSPQRSSSESSTVTADSLAATDVTNDDQTFIKHEEMDSYENFPEIDESFWT  
EDLSMGDNLDLMEVAGEKSQVQFPYSHDMKEQSVDMMVGAKLEDDMDFWYNVFI  
KAEDLLDLPEF\*

>Peaxi162Scf00566g00051.1

MENFNRCSTSTSSSSSESSSESSLNKAERIKGPWSAEEDKILTKLVERYGARNWSLISK  
YIKGRSGKSCRLRWCNQLSPNVQHRPFSHAEDETILAAHAKYGNRWATIARLLPGR  
DNAVKNHWNSTLKRRYQQQKNHNTVIFPDMKNGSGSGSGSGSGSRSGSGSCMDYL  
NVDESPRGTVNVKVVVNNCNSEYDDPMTSLAPPGMGDELPERKTESFSAGFWDV  
MRDVIAKEVREYVASSFNGASTGFP\*

>Peaxi162Scf00575g00016.1

MGRPPCCDKIGIKKGPWTPPEEDIILVSYIQEHGPGNWRSVPTNTGNSVGFTIFYILCSSL  
LYYFLEYCYNEAISLFLKGLMRCSKSCRLRWTNYLRPGIKRGNFTSHEEGMIIHLQAL  
LGNKWAAIASYLPQRTDNDIKNYWNTHLKKKLKKFQATGLDSQSLAPSDSNTYQFS  
WNFHDSKLQQNQNSSTSSSSTLYASSTENISRLLLEGWMRSSPNPSTKNIDDEILHENDQ  
NQEVYKNCESSWLHGGRNNTIGSTSIPKEYYKSVISEKSACDQSGGAVEKSCTNNAPP  
YTYLEKWLLDESAGQVEELMELPTIFT\*

>Peaxi162Scf00578g00007.1

MKTSVFTSSGVLRKGSWTEEDILLRK CIEKYGEGKWHQVPVRAGLNRCRKSCRLR



WMNYLRPHIKRGDFSPDEVDLILRLHKLLGNRWSLIAGRLPGRTANDVKNYWNTNL  
LTRA KL GPPQQHDRKCPKAIKTMAKNAIRPQPWNLSKLAKNNVSTIHKEEHSKQEIII  
EKPTTAEVVSRDENVEWWTNLLLDNSNGFEKAATESTSAFQNIESLLNEELLSPSING  
GTYYPMQETGDMGWSDLSIDADLWELL\*

>Peaxi162Scf00578g00008.1

MKTSVFTSSGVLRKGSWTEEDILLRK CIEKYGEGKWHQVLVRAGLNRCRKSCRLR  
WMNYLRPHIKRGDFSPDEVDLILRLHKLLGNRWSLIAGRLPGRTANDVKNYWNTNL  
LTRSKFGPPQQHDRKCPKAIKTMAKNAIRPQPWNLSKLAKNNVSTIHKDEHSKQEIII  
EKPTTAEVVSRDENVEWWTNLLLDNSNGFEKEATESTSAFQNIESLLNEELLSPSINGG  
TYYPMQETGDMGWSDLSIDADL\*

>Peaxi162Scf00579g00055.1

MVRAPCCEKMGLKKG PWT PNEDQILISYIRKNGHGNWRALPKQAGLLRCGKSCRLR  
WTNYLRPDIKRG NFTKEEEDTIIQSHEMLGNRLPGRTDNEIKNVWHTHLKKRLK NYK  
PPHNTKRHIKNDDSKGPTTSESIKSDFNSDTQKNINSPQHSSEISTVTAESVVM TQSQ  
AINDHDQMMIKHEEMESSEYFPEIDESFWTDELSTDNNCNHVVTAVPFSSVREENVD  
MLTTRMEDDMDFWYNEFIKTDDLQELPEF\*

>Peaxi162Scf00606g00073.1

MGRHSCCYKQKLRLKGLWSPEEDEKLINHITKYGHGCWSSVPKLAGLQRCGKSCRLR  
WNYLRPDLKRGTF SQEEENLIHELHAVLGNKWSQIAARLPGR TDNEIKNLWNSSIKKK  
LRQRGIDPNIHKPLSEVEIDEKELANSKNNEKASEGSSDLNFIEVHENS NLRIATEKPKP  
SASLV TMDRYPNGMSSAVPPTHEFFLNRFVTSHESSSTATCKPLDLASYLSFQQ LNYGS  
NIGLSMNPNTNPLL FNSNSKNSEMVSHHQFNSNMPNDILPSISNSILTSPVAAAACSSNI  
ELQRNSSFFDNNAFSWGAADHCGKSEKGANNIHSSESDTE DIKWSEYLHTQFLPGNT  
NIHSHQTSIQHLYSEKSGTQFTTEVSLSTTPWLPNQQQQPSIQTADLYNKH FQRLPDAF  
GQFS\*

>Peaxi162Scf00658g00110.1

MNTTIPKSSGLVRKGAWTEEDVLLRK CIEKFEGEGKWHQVPVRAGLNRCRKSCRLR  
WLN YLRPHIKRGDFSPDEVDLILRLHKLLGNRWSLIAGRLPGRTANDVKNYWNTHLQ  
RKLIAPPRQEIRKCRALKITENNIVRPRPRTFSNNAQNISWCSNKSITNSTIDKDGSNNE  
CIRISDKKPM AEVSRDDGVRWWTSLLANCNENDETAVENMSYDKLP SLLHEEISPTIN

GGISNCMQEGKTGWDDFSVDIDHLWNLLN\*

>Peaxi162Scf00682g00009.1

MGRAPCCDKANVKRGPWSPEEDAKLKDFIHKYGTGGNWIALPQKAGLKRCGKSCR  
LRWLNLYLRPNIKHGDFSDEEDRIICSLYSTIGSRWSIIAAQLPGRTDNDIKNYWNTKLK  
KKLMGLIPSSIIQRKSPYMFPTTLHATQVQPNPLYTPNLSYTNNNMNFPLGATNHQY  
SYNFQSHHQDSLINPMQIYPQLKDNLLMFGGTTEASCSSSDGSCSQLSFGHKEIKKEDI  
IMGNFSGHQISSVAFEENQNFMSWVDQKPNGYFGNNNNQSADQVLLQYDLDDQEVK  
QQQLTSCSNGNNGTTTSECNNNSMFYY\*

>Peaxi162Scf00683g00242.1

MDMNGATYISVRFLMGFEWVGSDADDDIELVRSIQERFALSTELREPLSLKPLYSIHPR  
GGSEFDDDDDDGDDFETLRAIQRRFAAYTDERTNPEEGFPACVDRTHFSEGCSYDIA  
ARSQTLIEWHDDDDSGAENTAVSANSSSFPKSAQAFVDAIKKNRSCQKMIRNKMMQV  
EARMEELKKLKERVKILKSFQLTCRKRMRGRALSQKRDARVQLISLPKQRFSSKLQGK  
KLSAIHYGPPENSHVASFKEALTEFAVSLSRKEWSKEEREKLAKGVKQQFQEMLLQHS  
VNLRSDDQDGCSESGDLDDTIASIRDLVNKIAPETMRLFLPKVNWQVASMWLNWE  
DPLIKHEGWDTVEEKSLHAVQQKEMSDWIGIAASLGVCRTPFQCLSHYQRLNASII  
RRDWTEEDIRLCSLVETFGESNWQVVASFMEGRTGTQCSNRWIKSLHPARKRSGKW  
SADEDKRLKVAVMLFYPKTWRNIGQSVPWRTPIWKKIAQFVPGRTHVQCRERWVNS  
LDPSLKLDEWTEEDLKLKSAIDEHGYSWSKVAACVPPRTDNQCRRRWMLFPDEV  
PMLQEAKKIHREAFISNFVDREEQRPALKPDDLVPHTKLKRDKAGCETTSANKKRKR  
PRAGREDTTPRSDAICELEKQHSDGEEGFQDFHDASKNRRPSKLRVRKTQNFAPND  
NVPDASASSQVESIIGDGNKCKRRKRTHLLMKKKAKNAALQESSSSFNPQSSMTAA  
EADIRDSRKTNNIMDGRHSIRECDNQLKAIDNRPETTEDCTTLASFISKSRAKGRLLS  
SAKVVKHPELGQSKTMADADNNSSCTTLASFISKSHAKRRSSSSAKVVKHPELGQSK  
TMADNTSSSISGHDGLGKTMTEDECTSSNGVVGAEVGDDMPLSLFMSRAKRKR\*

>Peaxi162Scf00689g00121.1

MDDDFSINSKNYLQDFEHLDLNFSIPTFNPNPDHNFMIETNSYDPFDPFSNIEDDLGDFN  
FCYERKPFEENIGASSSIVVNNIHGADEFSINKENFMDVNMYNEKSFSSVCCEDVKPL  
NFVVPDESSSCVTADINGSCKEIGGRKSKKMKRNDNNLSSSMKKPSRGRKKSKSAKG  
QWTIEEDRILHLVEKFGIRKWSQIAQMLKGRIGKQSHAEVGNKWAEIAKRLPGRTEN

SIKNHWNATKRRQFSRRKCRTKWPRPSSLLQNYIKSLNLEKGSSKKNFHDTNPNAKV  
MKVSTKLEPVDNFCQGNSIEQVHDYGFSEVQEFALDDKLFDDIPIGPSNMDDNIEKFM  
GLEMIPYELSTLVQGEVNKEIDLMEMISRVNKP\*

>Peaxi162Scf00700g00732.1

MGRPPCCDKTNVKGWPWTAEDAKILAYVASHGIGNWTLVPQKAGLNRCGKSCRLR  
WTNYLRPDLKHDNFTPQEEEEIILEFHKT V GSRWSLIAKQLPGRTDNDVKNYWNTKLK  
KKLVNMGIDPVTHKPF SQVFAEY GKICNLPIQNARNHIILSNNSTGKNQVFQEPNQFQ  
FSNETPHDTIQTHSFSEKENPSCVQVTQAEEKKSVDSFVDNILARDKQMLLDYPPLD  
VYLDY\*

>Peaxi162Scf00714g00029.1

MNQVLLRIYFGYKIMIQVKEEVQTLDFCGFASCSSFS DSSYEASTSRYSSEPGCRRSSG  
PTKRSSQAGWTEEDYLLSEVV KRYNGRNWKKIAECMSGRTDVQCLHRWQKVLNP  
ELVKGPWTKEEDDVIVELVEKYGCKKWSLIAKSLPGRIGKQCRERWHNHLDP TIKRD  
AWTEQEE SVLLHYHQIYG NKWADIARFLPGRTDNAIKNHWNSSAKKRLSLNIQSEGS  
PNFSSHEKKLEIGKYSLQAQSVEQTIFSGEQKGVDNAADACSTDLTIGCTYSAQNALR  
KDTSLFGACKSSEENV RD LKPLGGIQFGKAEIPIGETDKPCHSNLNHTKILYPLSTSSL  
EFPLDRSHITSLSSSQVEAVHPASFGRMYETPKRSRHDVNNPDQDFLSLSLPGFTEVHS  
QGSKRNKSFD MQSSLDLNQHGC LYEPPQVKDLMIPLTDENLSSDNIIGADHGPPFCS  
TPPSLELTVSGNGSSSPESMLRNSAMSYTKTPSIIRKKT SKFSEAVRHSNCTGTTTPMY  
SFLGDPDRGDSSNLKDRISGCKTSVSGKSLGRRLEYAFDMEWDASRCRTPVSAAPPC  
GLNLGAIGANTIQIIRIDGSIRDDFDSCQFEATKISEAMTMLRLSSLE\*

>Peaxi162Scf00753g00338.1

MSKGIVMNSCSHEDEFELRRGPWTLEEDNLLIHYISSHGEGRWNALAKCAGLKRTGK  
SCRLRWLN YLKPDIKRGNLTPQEQLLILELH SKWGNRWSKIAQHLPGRTDNEIKNYW  
RTRVQKQARQLKVDSNSKKFVEAIKSLWMPRLLEKMEQQCSSSISSPASSSSKISIEKQ  
SSSLPSPLINHQEPYKSHDNTCNYDNEK TNSLEHPRIYTSSSMIQEEGYHVESFNQQPD  
FSSQEMSISECEMGETNWFTDEMGGSLWNMDEFWQFRKLGDVDI\*

>Peaxi162Scf00763g00441.1

MGRHSSFVKEKLRLKGLWSPEEDEKLYNYITKFGVGCWSSVPKLAGLQRCGKSCRLR  
WNYLRPDLKRGMF SQEEEDMIISLHQVLGNRTDNEIKNFWNSYLKKKLIKQGIDPNT

HQPLSENQVRNETDCKDKASTSTQIQPFNLSKRNFNYEASRQLTEASKDQLVSKQV  
FDPLFLYEFQANVNPSGYNLRPYDHNQNQIEGNTNFGFFSMPSLTNFEQGHMTETDFS  
ESSSSRMSLLYISEAKESSSNSSNMISHHNAAGIQMNEMLENSQALSWDVDNKIDSLF  
QYPYDGIKNEEDFNNPLSSLSEDLSGENLDV FHQI\*

>Peaxi162Scf00777g00521.1

MGRPPCCDKVGVKKGPWTPEEDIMLVSYVQEHGPGNWRAPVPTKTGLRRC SKSCRLR  
WTNYLRPGIKRGNFTDQEEKMIIQLQALLGNKWAAIASYLPERTDNDIKNYWNTHLK  
KKLKKLQETGDDLFSRENGYFSSSNSTSKGQWERTLQADINMAKQALHNALTLENLS  
SCVKQESQVSTYASSTENIARLLKGWMGSSTNNSDYKTSSNNVATADSSSCDGTPSA  
ESEIGLMESFKSLFGFESFESSSDQFSQTASPDASKLKGEIKKEANEQMPLSVMLENW  
LLDENTIQ GKDDL SNFSFDETNDLF\*

>Peaxi162Scf00779g00512.1

MGRAPCCDKNGLKKGPWTPEEDQKLIDYIKEHGYGNWRTL PKNAGLQRCGKSCRL  
RWTNYLRPDIKRGRFSFEEEEETIIQLHSV LGNKWSAIAARLPGRTDNEIKNYWNTHIR  
KRLLRMGIDPVTHSPRLDLLDISSILNYPALYNNSSHQVNF SRLLGHVQPLVNPEVLR  
LATSLSSQRQNSNFLMPNNVQENQICISQVQNQVHPMVQVTSQVQNPIQNIPTCTTL  
SITPSVPFYDEARLMEQFSSNLVNSSSQNCQVNEWQSSGMASNLT DQDYFNNPLQNY  
GYHHELDQSIRD PPLSDASTFQSNDSNNFSFQSVLSNLSTPSSSPTPLNSNSTTTEDERD  
NSYCSNMLNFDNIPNIWDSTNEFM\*

>Peaxi162Scf00786g00439.1

MDQNLHHQPKIMHRCCSHEVV SFVLIWKTEVNSMEW E FISM TKQEEDLIYRMHKL V  
GDRWGLIAGRIPGR TAE EIERFWIMRHSDGFAHKRRQLRKV\*

>Peaxi162Scf00797g00013.1

MGKQPCCDNVGHNRGPWTVEEDHKLTNFILNNGIQNWRHV P KLAGLVRCGKSCRL  
RWMNHLRPDLKKGAFTED E EYMLIKLQSQLGNRWSKIAAHFPGRTDNEIKNHWNTR  
IKKKLYTEQTRDIKEGSTKQKYSGQQLPSLEYLVKDQQQLKEPIEISEMG SNDVNQN  
SEPVETISIE

>Peaxi162Scf00840g00121.1

MGRTPCCDKNKVKRGQWSPDEDEILKNYLLKHGTGGNWITLPLRAGSLLSLSRHTR  
QNYVIYYLIITQVYELFLLCRWSIIASKLPGRTDNDVKNHWNTKLKKKLLAKNANPTS

SFDESNEVFNTSTPNALLFMVPKEEEKQAPYQFPFPNMDSAGLSINTNNIDQKHFIPIPS  
FTQENSKNSGTSSVSFDETNWFEKGANDSFEGFPLGFSTDEIMDGIWSTQQSLFEEIDF  
PSTFI\*

>Peaxi162Scf00847g00211.1

MGRAPCCDKANVKKGPWSPEEDAKLKEYIEKSGTGGNWIALPHKAGLRRCGKSCRL  
RWLNLYLRPNIKHGEFSDEEDRVICTLYASIGSRWSIIAAQLPGRTDNDIKNYWNTKLK  
KKLMGLVSTSQKIRPLHNQHQIITNYNYPQIPFHTSSSLASSSPYSSTTTIPCYESTIPT  
LASSSFLNTASASCTSGISGSTSGTVLQVQESYVGGPTTSSDGSYTNQMSQGRDQLEY  
DYGVSNNGENLDFHNYLYNNGIIGLEDQSTSSKFLNIEAADEKPIINANSCYVQQEQN  
PLDYSLEEIKQLISTNNVTCNSNFFLDENKIEEKVMMYY

>Peaxi162Scf00876g00221.1

MGRKPCCSKVGMRKGAWTAAEDRLLTNYIELNGEGNWRSLPMKAGLLRCGKSCRL  
RWVNYLRPGIKRGNFSPEEDDLIRLHTLLGGRWSLIAGRLSGRTDNEIKNYWNTYLL  
KKLKAAGIEPKAKTKKYSTNTRQNKEMKRRRAKNKTDNLLHQAEEKPRGKKEDCEV  
VEKIQVHRPKAIRLTKGYSSSTSSSFSSSSSQSSCQDNAPKFNPLSSEEVDNKKEEKIE  
DNAIYEKLQLFDKLLNGCDISTECSEQTSSCCYMLDE

>Peaxi162Scf00886g00028.1

MVRAPCCEKVGIKRGRWTAEEDELLKYIQANGECSWRSLPKNAGLLRCGKSCRLR  
WTNYLRPNLKRKFTSEEDETIFKLQCSLGNRWSLMASYLPGRTDNEIKNYWNSHLR  
RRIYTFGMKKKPIKTAAEMPNTIVADGLNCESLKKRGRVSRKAKKYNNNTTTTTT  
AYISTLKPSSGVGAGGGAICSEGDSIVDAGIGLDIQQHDEDHAGSAIGKPRNEETEGT  
NQKHINATAEKQEVNRGILSFEEQGQQVLDEHILIGPHEKNVGDENVHLQQPNYCLH  
DFGNQVSLSGVLEVDEESHENWWSTMNSDNFLEDELWVDQCSSLDFEGSIEECDD  
MLLPLWDDN\*

>Peaxi162Scf00911g00012.1

MGRSPCCEKLGKKGWTPPEEDQKLMACIEKHGCGSWRALPAKAGLKRCGKSCRLR  
WNYLRPDIKRGKFSLQEEQTIIQLHALLGNRTDNEIKNYWNTHLRKRLTKMGIDPITH  
KPKTNIFGSSQLSHMAQWENARLEAEARLVRESKKQISNNNIHDFGSLANTRLAHHQ  
LFNQRSRINNIVPLQAKVPPFLDVLKVVWQDSNWTKPKITKDTSSSSVLDSVLTSMNNG  
SFDSPTSTNNLFMAPNNNIPRLVDNSCLVNAGSFMENPEVEIITKEEVQTDQVQINDIS

SINYMSITDQSSGFPSFIQGFTHLENIVGSSEDNLEDNKYSYWNTILNSCTSPAGSPVF\*

>Peaxi162Scf00929g00071.1

MEGSSSTCSSSSSESSL SAGTPKTPRDGNNNKPERIKGPWSAEEDKILTRFVERYGAKN  
WSLISKYIKGRSGKSCRLRWCNQLSPEVEHRPFSPAEDDTILAAHAKYGNRWATIARL  
LHGRTDNAVKNHWNSTLKRRQQIRNNVSVVESPIIIIRNDIIVNVNNWDEVDPMTTL  
SLAPPGCRRRRCRWSFGM\*

>Peaxi162Scf00944g00140.1

MGRAPCCDKTKVKRGPWSPDEDNTLKNFVEKNGTGGNWIALPQKADINHGAFTTEE  
DNIILTLYSQIGSRWSVIAANLQGRTDNDVKNHWNSTKLKKLLAAAEITNISSNYNSV  
LNHNYCATESTCFISNTLTSLVEPNLTMSSNLVPAMLVETSCQFPLPGLMEIQENGAIT  
TLQEDGNYLMDFSSGISSTYYDILNGFDFQEKVITADPNCSSSSCSTLVQQQGYIPDID  
QYPFKGVEN\*

>Peaxi162Scf00945g00023.1

MDIITKKGKHIDRVKGPWSPEEDELTLQLVNKHGPRNWSLISK SIPGRSGKSCRLRWC  
NQLSPQVEHRAFTIEEDETIIRAHARFGNKWATIARLLNGRTDNAIKNHWNSTLKRC  
SSLSADEGNQLADQIFQNDNQPPPKRSVSAGSALPVSGFNFSPGSPSGSDSDSSFHVSS  
SSQCCVFKPVPRTAGVLPPGLACPMDTSSSPEAGDPPTLLSLALPGVDSAEHSAESTQ  
VKALLLPQATQIPPPPPPLQAVPIQHGEQQDKVFVPFSQELLGVMQEMIKTEVRNYM  
MGIEQHHPQQQRQQQQQQQYHQQQNHQLPNGIGLGLCIQQATDGRNTAANRI\*

>Peaxi162Scf00978g00214.1

MTSECVDRMTSKVGVDSSAVEEASGGGNAGGGVPLKKGPWTKAEDAILVDYITRHG  
EGNWSAVRKHSGLARCGKSCRLRWANHLRPDLRKGAFTPEEERLIIEHAKMGNKW  
ARMAAELPGRTDNEIKNYWNTRIKRQQRAGMPMYPPDICYQAFRENKQNKELGTFS  
SADSHPDFSPINSFEIPAVEFKTLELSQQRYPPALLDIAANSSLDIPATSLLAQGLNFSCN  
TRSFLSTMHPSKRIRGLESWFSGLNDDFFQACHQFENDGSLFAESLGYSSPHTDNLISV  
HHPAFSGVFNGSHASLNGNSSSEPKWAKKLELPSLQTQMASWGSPSPLESYDTLI  
QLPPSEHIDSGSLSPGNGLLDVLYESQAFRASKNNLHQETCDVDDSCPDVQATW  
GTHSGPNSPLGHSAASVFSEYTPIFGGSLEHPRSVASLFGENGCKIKQEDVDLAPTDRN  
NDVSNHQIFAWTESCFAPTVLVPQQNRVLCCLTLLPFVSPSESWAQTLLDFPPPLLQSSS  
QPATILRSSD

>Peaxi162Scf00986g00227.1

MVQEEIIRRGPWTEQEDFQLVFYVNLFGDRRWDFLAKVSGLKRTGKSCRLRWVNYL  
NPGLKRGKMTPQEERLILELHISKYGNRWSKIARKLPGRTDNEIKNYWRTHMRKQAAQ  
DQRKNAFISPSSSFSNCSSNSSANSAPVDSIPITKQNKRNLETAEEKKIYNHEEAEENQN  
MVYTMDEIWKNVESSQETETMSKLPVMASPIWDYCPDSLWMTDFNYFDNQDIPFFT  
G\*

>Peaxi162Scf01007g00117.1

MSEQMDSWGMTKQGWRKGPWTSEEDRLIEYVNLHGEGRWNSVARVAGLKRNGK  
SCRLRWVNYLRPDLKKGQITPHEEKLILELHARYGNRWSTIARNLPGRTDNEIKNYW  
RTHFKKKTKNSRDKSEKSKVRLVKRQQWQQQKQQQKLNTQTDSNRVVSLNNKKNY  
YASILNKLGNKIVSLLDKNENRILPLVTQKENQEMANLYSNTADQEEDDFLNSILNDY  
TCVSLLESSFNEDMMWDDFWNNLDEYQCNVSTTI\*

>Peaxi162Scf01010g00010.1

MEEAEQQSDFKLIDAAVNGGDTMAVDENNGGGGGGGKVKGPWSQDEDTVLSSELVS  
KFGARNWSLIARGIPGRSGKSCRLRWCNQLDPSVKRKPFTTEEDNIIQAHAVHGNRW  
ASIAKLLPGRTDNAIKNHWNSTLRRRFAGLKRVNPSHFEMLDSSNIDRVKATSEETRS  
GDDHNQSKSLEGREASVQQCKRTLLEDRAPVSEMFGVPEKVAHLVSGSCHSTINENN  
PSVSRPTAKVGAFDVHNLSSASFASRTVPIQGNLLQAFSPDFGICKLLEGLPDEPIIPSS  
CGHGCCSAHSKSSSASSLLGPEFVEYEDLPAVSSHELFAMATDLNNIAWIKSGLENAG  
KLDPKTTSGRDHQGSSTSTPMPMPMTSFVLPAQVESLS\*

>Peaxi162Scf01068g00314.1

MRLLRFCVLASCDFQEMNFLTQNSLVMDYNKGRHCLSNGSTDGKVLENPWIFHSMV  
EDENGTKLNVETEEVDLVGRKNNGGTKLCARGHWRPHEDAKLKLVAQYGPQNW  
LIAEKLGRSGKSCRLRWFNQLDPRINRRAFSEEEEEERLLTAHKMYGNKWAMIARLFP  
GRTDNAVKNHWHVIMARKHREQNSVYRRRKPSNMQQFHSMGFPHVSGSDNAIQSN  
NLNSDSTISSTTNMDEHCASTCTDLSLTPSSSKVIFMKRLTHMQHHHHPLLEASKGF  
SRDAQEVKMESGVHPKFLHGKEPRADTVDASHQYCGGSDTNSDISASESVANNMT  
NVKMYGQNHENVKLVEKQMKSKTMPAFIDFLGVGAT\*

>Peaxi162Scf01101g00048.1

MGRSPCCDETGLKKGPWTPPEEDQKLINYIKKHGHGSWRALPKLAGLNRCGKSCRLR

WTNYLRPDIKRGKFSQEEEQTILNLHAILGNKWSAIATHLPGRTDNEIKNFWNTHLKK  
KLIQMGYDPMTHRPRTDIFNSLPHLIALANLKELVEQSEVARIKYLQYLLQPSMAANL  
ANSMSTSNTCSVANISDMEAYNNLLNIGTNHLENSTNNIPPPSTTLQAIQDSITFSHLPE  
LQATPNCNCFQNSLNEENMVQTHVISQGENTPTSPWQLPSSLSPPENDNQPINSYINNIG  
GSCNPPFFGGAHPSVWPEILLEDSDLFQDIA\*

>Peaxi162Scf01194g00013.1

MDHQHAKVDLRSKEAACSTNNIIQKVEEDDMDFKRGSWTVEEDFTLINHIALHGEG  
RWNSLARSSGLKRTGKSCRLRWLNLYLRPDVRRGNITLEEQLLILELHSRWGNRWSKI  
AQHLPGRTDNEIKNYWRTRVQKHAKQLKCDVNSKQFKDTLRYLWMPRLVERIQASN  
SSKNQVIQQTSTNNNISNNIIPMSFTQENSSTTTSENSLGTQVISQVSDTSDCCYNYSTI  
NQSDTLCYGESLTPTGYFHQEGALDFRTVDIDDNQQTNQFLDVSDNLWNIEDMWFL  
QEQLN\*

>Peaxi162Scf01210g00002.1

MNTSVFTSSGVLRKGAWAEEEDILLRKCIKEYGEGKWHQVPVRAGLNRCKSCRLR  
WLNLYLRPHIKRGDFCPEEVDLIQRLHKLLGNRWSLIAGRLPGRRTANDVKNYWNTHLL  
RRSNFASPPQQHERKCTKEIRTMAKNAIIRPQPRNLSKLAKNNVSNHSTIHKDEYSKQ  
KMFIEKPTMAEVVSRDNNVEWWTNLLLDNCNGFEKAAPESSTFKNIESLLNEELLS  
ASINGGTNYPMQETGDMGWSDFCIDSDPWELLQ\*

>Peaxi162Scf01221g00042.1

MGRSPCCEKAHTNKGAWTKEEDERLIAYIKAHGEGCWRSPLKAAGLLRCGKSCRLR  
WNYLRPDLKRGNFTEDEDELIKLHSLLGNKWSLIAGRLPGRTDNEIKNYWNTHIRR  
KLLSRGIDPSTHRIMNEPSTQKVTTISFAAGNEDIKDQKISIKAEFEQIKDDEIISKPIKEQ  
CPDLNLELKISPPYQQHSDRALQQSTTGSGGASTICFTCSLGLKNNKGCSCSRNRSMN  
VAGYDFLGLKTNGLDYRTLETTRK\*

>Peaxi162Scf01251g00013.1

MGRTPCCEKLGLNRGPWSKKEDDILINYIDKHGHPNWRQLPKLAAFTWSVIAAKLPG  
RTDNEIKNIWHTRLKKKMNQSQIQEKTPIREQPSETSKSEDSTNIQENTEISSPKPNSN  
NQHEPSSSLRSSSSITSSSEGSCSNTTTTSSHIDESRDQMNLENLLEVDDNFWSEVLWA  
TPADDSKDNNLDFSLSSVEKKNYELDSSLNDNWLWDDLFSRANEFLLFPELV\*

>Peaxi162Scf01256g00017.1



MGRPPCCDKIGVKKGPWTPPEEDIILVSYIQEHGPGNWRVPTNTGLLRCSKSCRLRWT  
NYLRPGIKRGNFTEHEEKMIHLLQALLGNRWAAIASYLPQRTDNDIKNYWNTHLQKK  
LKKLQGHDDQNNQKGKSQSISKGQWERRLQTDIHTAKQALVDALSLDKKTTNVVSP  
NINSSANSLPVGQTSSYASSAENISRLLQNWMMKNPKSSQTTSNSTTSQSSFNLSMVS  
SSSPSEVTMSATTPEGLDSLFSFNSSYNNSDVSQSMILTDEVVAGIFQDGSKQNWQNFK  
DESGIFQKGSKQNMETQVPLTLLENWLFDDANAQTQEELMGIGVGMWEP\*

>Peaxi162Scf01302g00033.1

MEIHSLEILETSNPVEGGSYGGDSGGEDEMLENESGSSENVVKKNKRTSGERVKGPW  
SPEEDAILSKLVSNFGARNWSLIARGIPGRSGKSCRLRWCNQLDPSVKRKPFSDDEDR  
LILQAHAIHGKWKASIRLLPGRTDNAIKNHWNSTLRRRHNGKLRSDPSNVLEDVSA  
EKSKASSEETQSCGDVNSLKAIEGKDVSSQENQEDNHHEKSEAQVQRSDAANDPPT  
LVRPVARISAFSVYGSGLDVPEAQIQTPLTPVQAPDLGISKLLEGCFDRLVPHQCGHG  
CCGNASQENNGSSLLGPEFVDYAEPPSFSSHELAALATEISNVAWCKSGLENSNIEVIC  
NPTRATSGTSLLPNRPF\*

>Peaxi162Scf01314g00012.1

MGRAPCCDRSSVKKGPWSPEEDAKLKAYIEQNGTGGNWIALPQKIGLKRCGKSCRL  
RWLNILRPNVKHGGFSEEDRIICSLYIILQPIPYSDYEPRLNGASIRKLLIKLGGKFSE  
DDQPISGEQDPQYPMNNSIISMHSIYENPINLISSPLDVLNAQYNMNHGTALTTSPLQG  
NFTAERMICNINSQKLGDLFFI\*

>Peaxi162Scf01390g00030.1

MCTSGITGLHKGALITLGSIVAIAAGFMTVITKLENSDVCLAYLPFAHVFELATETVILT  
VRIQGYVSDGTVKKVETKGVSAKNRIETKFGAVLEDTTDITERSMVGDEKVGIPRKE  
KKKSKNNKNADISGLGMTMADAAETRKDSVKAESKPTGGSVNHDIKKKKKKK  
REDGTHPDKSNKDSDESAACVEKKKKHKKLRSHQDEQQIILDAPINTKSVAYASAR  
ERGDSENVIKILGEVSGGNAVEEIRKKKSKKSNKHAVEGDLSSSEKKLCVVGKKE  
RDKVNMETKAAGESDVCDVKKNKEREKEKHPGKSTKDSKDDLGVEKKKSKKLK  
KSCRDESETMHGIEDEQEAIVAKVNRGDISSTVEEIEEQSRTDTGKIRKKKKATIGHSSE  
DPHEKSEKKVRFSGHVEIFPSSSDPSDEKHETEEENLLRGKRFSTLEDEIVKEAVHKY  
IEMHNLGEEGLEMILNSRSHPELKGWCWEIGSAIPYRPTYAIYYRAQVLFRRSEKRW  
TEEEYEMVRKYHEVHGKWKDLADELGKHRFHVKDTWRRLKLTNRNKGQWTQEE

YQTLFDLVNTDLRLKLSEEKSKHGMRLDNIAWTAISGNLSTRTDANCCLKWYDQLT  
SPMVSKGEWADTDDYRLIDALFELDASCIEDVDWDNLVDHRPGEICRKRWNQMV LH  
IGQYVNKSFSEQVEVLAKRYRPELVEVREAWDSKPIVYYCRSKAGNASGGSDIIEELT  
VDQEQNTATETRDEGFDSVLLTKHKQKNVTESTKLWPSAAISSSGKDNNCSHSEWLT  
HSALRINAGGHRYLPSCSHPFVADVQPSSCPAMISIFLILAGFLASGGFGATATFILIKPS  
FARLVKN\*

>Peaxi162Scf01464g00024.1

MGCKIVEKTKQKHKKGLWSPDEDDKLRNYIINHGHGCWSSVPINAGLQRNGKSCRL  
RWINYLRPGLKRGAFSLEEEDTILTLHAMFGNKWSQIAQHLPGRTDNEIKNHWSYL  
KKRVAKNAENESQTQSGNRESLLFSKKWTPQNSSLDSFEHIEGSLADSDQSGSQVDFP  
KEHQKSNLPKVLFAEWLCLDKFHGQDFQNSGTFDLTKNNFGYNNSESQHAFMHGLL  
MNEGSYGSCMNQEVNNGTVDDMFQPQLKFEDSMSANGFEDFMSGEFINTDVMYI\*

>Peaxi162Scf01819g00004.1

MEGGSGGDGSAYQPYQNIPTNLSIFQQGPPLIAINRYLLSHQSQFSSQQSVNNQSIFSQ  
CGGLCDFSSYSGISHANGISWSSVPEPSFVDRIFLSHEQNGLHWNNQENGIAEEMISSQ  
QNSKEAGKKAKEGPSSTTVLVKGQWTEEDRKLVLKLVKQFGMRRWAQIAENMVGR  
AGKQCRERWHNHLRPDIKKDAWSEQEELILVEAHQQIGNKWAEIAKKIPGRTENSIKN  
HWNATKRRQHSRRNKFKKQEKDGQND SKYRSNILRDYIRSKYFSDNSPPTASTPSNSI  
STNATPPYSDDDSPSLLTRQTYDEEMNFMQNLFGENSLVENNGKVAEAMEAKTRQCP  
FDNKSSSSSCP FN SLVAGYTKSDNQIVNDNSEYGYNMYMADHYSKVTQQSDSDQCS  
GIYLSYLLDHSTSANS LPCSGSIGYGNMNAGTLVNQGSSSSKGNKEVDLMEIVSSTLY  
RQQTSHTTFFN\*

>Peaxi162Scf01969g00021.1

MRCKPVESP KKKHRKGLWSPDEDHKLKNYILEHGHGCWSSVPINAGLQRNGKSCRL  
RWINYLRPGLKRGAFSIEEEETIMTLHGMIGNKWSQMAQHLPGRTDNEIKNHWSYL  
KKRVAKIAENEAKSQNMDGLSSSSLKLT SRNSSLD SFAQIEGSLTD TDQSISQIEFLKEP  
RESNFQKVLFAEWFTLDQFKSQDFQNSGNSNHSRNNNFGYNKSDFQDGFHGLFMSE  
GTYGADINIPGVLNNETVDDMFQASQFKFEDHMSANGFEFISDEFNITEDVMYI\*

>Peaxi162Scf03779g00019.1

MRKACCDNKEEMHRGAWSKQEDQKLIDYITKHGAGCWRNLPKAAGLLRCGKSCRL

RWMNYLSPNLKRGNFSEDEEDLIHKLHALLGNRWSLIAGRLPGRTDNEVKNYWNSHL  
RRKLIKMGIDPKNHRISHYLHRKRLEYWSENSSRGTDHEVVSDAGSSCAKHQPSSLP  
DLNSPPSIHSSCAQP\*

>Peaxi162Scf03974g00003.1

MGRIPCCEKENVKRGQWTPEEDHKLSSYIAQHGTRNWRLIPKHAGLQRCGKSCRLR  
WTNYLRPDLKHGQFSEAEETIVTLHSV LGNRWSVIAAQLPGRTDNDVKNHWNTKL  
KKKLSGMGIDPVTHKPFSHLISEIATNLAPPQVPHLAEAAALGCFKDEMLHLLTKKRIGF  
QFQQFGTSTAPSTSTVKVEDNKEETIEKIKYGLSRAIKESDMLPSNKHWDPSGGARST  
NLAEPSSGFPHVSDGGFQYNFASLLHEDAAEGSPWNQSLCTGSTCTVGEQQQVHQLH  
KKLNSNDNCGEDNSDGAKETRNGSTTMFHSDCILWDISSDDL NPMV\*

>Peaxi162Scf25743g00028.1

MHFLNRMQAASRMWIGTIFLITGLESYVGNEMVRQLSGASTIEEIEDSITDNGNIRKR  
KKTKLRHNYEDLPHQKSDDRVRVFSCNVYPPSRDTIDEKHEIEEESNVDIVTGVNRGVV  
STIEEIEDSKIDDATIRKRKKTKLGHNSEDLTLEKGEKRVRFSGDVQVFPPLSYSTDEN  
HEVKDGSLLRGKRFTSEEDIINDAVYRYIEVHNLVRTCWKTIGRAIPYRPYRAVYNH  
AQLFFHRGEKHKWTEEEFEMIQKFHGEHGPKWRVLGDKLGKYWVHVGNAWQKIKL  
ANRNKGSWTQEETHPDFISKHGMLRGNICWSAISDRLSTRIKQHCCNKWYKQLTSPM  
VPTGEWADTDDYA\*
